# Supplementary material for: Social and behavioural factors associated with depressive symptoms among university students in Cambodia: a cross-sectional study
Source: PubMed Central journal article supplement — BMJ Open. 2018 Sep 28;8(9):e019918. doi: 10.1136/bmjopen-2017-019918 (PMC6169749; doi:10.1136/bmjopen-2017-019918), 2018-09-28
Supplement: bmjopen-2017-019918.draft_revisions.pdf [file bmjopen-2017-019918.draft_revisions.pdf]

# BMJ Open

BMJ Open is committed to open peer review. As part of this commitment we make the peer review history of every article we publish publicly available.

When an article is published we post the peer reviewers' comments and the authors' responses online. We also post the versions of the paper that were used during peer review. These are the versions that the peer review comments apply to.

The versions of the paper that follow are the versions that were submitted during the peer review process. They are not the versions of record or the final published versions. They should not be cited or distributed as the published version of this manuscript.

BMJ Open is an open access journal and the full, final, typeset and author-corrected version of record of the manuscript is available on our site with no access controls, subscription charges or pay-per-view fees (<http://bmjopen.bmj.com>).

If you have any questions on BMJ Open's open peer review process please email [info.bmjopen@bmj.com](mailto:info.bmjopen@bmj.com)

# BMJ Open

## Social and behavioral factors associated with depressive symptoms among university students in Cambodia: A cross-sectional study

|                                 |                                                                                                                                                                                                                                                                                                                                                                                                                                                                                             |
|---------------------------------|---------------------------------------------------------------------------------------------------------------------------------------------------------------------------------------------------------------------------------------------------------------------------------------------------------------------------------------------------------------------------------------------------------------------------------------------------------------------------------------------|
| Journal:                        | <i>BMJ Open</i>                                                                                                                                                                                                                                                                                                                                                                                                                                                                             |
| Manuscript ID                   | bmjopen-2017-019918                                                                                                                                                                                                                                                                                                                                                                                                                                                                         |
| Article Type:                   | Research                                                                                                                                                                                                                                                                                                                                                                                                                                                                                    |
| Date Submitted by the Author:   | 05-Oct-2017                                                                                                                                                                                                                                                                                                                                                                                                                                                                                 |
| Complete List of Authors:       | Ngin, Chanrith; KHANA Center for Population Health Research; Royal University of Phnom Penh, Faculty of Development Studies<br>Pal, Khuondyla; KHANA Center for Population Health Research<br>Tuot, Sovannary; KHANA, Research Center<br>Chhoun, Pheak; KHANA, Research Center<br>Yi, Rosa; Royal University of Phnom Penh, Faculty of Development Studies<br>Yi, Siyan; KHANA, KHANA Center for Population Health Research; Touro University California, Center for Global Health Research |
| <b>Primary Subject Heading</b>: | Mental health                                                                                                                                                                                                                                                                                                                                                                                                                                                                               |
| Secondary Subject Heading:      | Public health, Epidemiology, Sociology, Health services research                                                                                                                                                                                                                                                                                                                                                                                                                            |
| Keywords:                       | Cross-sectional survey, Depressive symptoms, MENTAL HEALTH, Social and behavioral factors, University students, Cambodia                                                                                                                                                                                                                                                                                                                                                                    |
|                                 |                                                                                                                                                                                                                                                                                                                                                                                                                                                                                             |

SCHOLARONE™  
Manuscripts

only

1  
2  
3 1 **Social and behavioral factors associated with depressive symptoms among university**  
4 **students in Cambodia: A cross-sectional study**  
5  
6

7 3  
8  
9 4 Chanrith Ngin,<sup>1,2</sup> Khuondyla Pal,<sup>1</sup> Sovannary Tuot,<sup>1</sup> Pheak Chhoun,<sup>1</sup> Rosa Yi,<sup>2</sup> Siyan Yi<sup>1,3,\*</sup>

10 5 <sup>1</sup>KHANA Center for Population Health Research, Cambodia

11 6 <sup>2</sup>Faculty of Development Studies, Royal University of Phnom Penh, Cambodia

12 7 <sup>3</sup>Center for Global Health Research, Touro University California, USA  
13  
14  
15  
16  
17

18 9 \*Correspondence: Siyan Yi, No. 33, Street 71, P.O. Box 2311, Phnom Penh, Cambodia

19  
20 10 Tel: +855-23-211-505 / Fax: +855-23-214-049 / Email: [siyan@doctor.com](mailto:siyan@doctor.com)  
21  
22  
23  
24  
25  
26  
27  
28  
29  
30  
31  
32  
33  
34  
35  
36  
37  
38  
39  
40  
41  
42  
43  
44  
45  
46  
47  
48  
49  
50  
51  
52  
53  
54  
55  
56  
57  
58  
59  
60

## 30 ABSTRACT

31 **Objective** To explore social and behavioral factors associated with depressive symptoms among  
32 university students in Cambodia.

33 **Design** Cross-sectional study.

34 **Settings** Two public universities, one in the capital city of Phnom Penh and another in  
35 Battambang provincial town.

36 **Participants** This study included 1,359 students randomly selected from all departments in the  
37 two universities using a multi-stage cluster sampling method for a self-administered  
38 questionnaire survey in 2015.

39 **Primary outcome measure** Depressive symptoms measured by using the Center for  
40 Epidemiologic Studies Depression scale (CES-D).

41 **Results** The proportion of students with depressive symptoms and severe depressive symptoms  
42 were 50.6% and 19.6%, respectively. Students with depressive symptoms were significantly  
43 more likely to report poor academic performance (AOR=7.31, 95% CI=2.24-23.86), having  
44 thought of ending life (AOR=1.60, 95% CI=1.01-2.56), higher consumption of unhealthy food  
45 (AOR=1.72, 95% CI=1.08-2.76), severe problem with sleeping (AOR=2.81, 95% CI=1.31-6.06), a  
46 negative perception about their body shape (AOR=0.54, 95% CI=0.29-0.99) and their general  
47 health status (AOR=2.99, 95% CI= 1.28-7.00), and limited physical activeness (AOR=0.30, 95%  
48 CI=0.16-0.58). Students with depressive symptoms were also significantly more likely to  
49 encounter physical violence (AOR=1.39, 95% CI=1.04-1.86) and psychological abuse (AOR=1.82,  
50 95% CI=1.37-2.42), and lack of general and medical care (AOR=0.51, 95% CI=0.30-0.86) by their  
51 family when they were growing up.

52 **Conclusions** The key factors associated with depressive symptoms were family-related and  
53 individual behaviors and attitudes. Thus, efforts should be invested in comprehensive screening  
54 and intervention programs to diagnose those vulnerable students early, offer immediate  
55 treatment, and cater appropriate support.

56  
57 **Strengths and limitations of this study**

- 58 • This research is among a very few studies in which standardized tools are used, and  
59 rigorous analyses were performed to explore social and behavioral factors that may  
60 determine mental health status of university students in resource-poor settings.
- 61 • It included a large sample students randomly selected from all departments in two  
62 public universities – one in the capital city and another one in a provincial town – using a  
63 multi-stage cluster sampling method.
- 64 • Several factors in different domains were identified highlighting particular efforts that  
65 should be invested in comprehensive screening and intervention programs to improve  
66 mental health of university students.
- 67 • Limitations of the study included the representativeness of the study sample, the  
68 cross-sectional nature of the data that limits causation inferences, and potential  
69 bias of self-reported measures.

## 71 INTRODUCTION

72 University students have poorer health and higher rates of mental disorders, notably  
73 depression and anxiety, compared with their peers globally.<sup>1-5</sup> Depression is one of the most  
74 prevalent mental health problems among university students, and the prevalence is rising.<sup>6 7</sup>  
75 There are varied prevalence estimates of depressive symptoms among university students,  
76 ranging from in the area of 10%<sup>8-11</sup> to in the region of 20%<sup>12</sup> and up to 40% and 80%.<sup>13-15</sup>  
77 However, the mean prevalence of depression in university students stands at 30.6%.<sup>6</sup> University  
78 students are in a critical period of life since they transition from adolescence to adulthood,  
79 which requires them to make many major decisions. During this period, they encounter  
80 tremendous pressures, chiefly from economic stress, academic demands, interpersonal  
81 relationships, and struggles with making crucial decisions.<sup>16</sup>

82 Depression manifests in a wide range of symptoms, encompassing sleep and eating  
83 disturbances, lack of self-care, poor concentration, anxiety, and disinterest in everyday  
84 activities.<sup>17</sup> For university students, depression is correlated with poor academic  
85 achievements;<sup>18</sup> drop-out;<sup>19 20</sup> relationship instability;<sup>21</sup> suicidal ideation, attempts, and  
86 conducts;<sup>18 23 23</sup> poor work performance;<sup>24</sup> substance abuse;<sup>25 26</sup> acute infectious illnesses;<sup>27</sup> and

1  
2  
3 87 poor physical and mental health in general.<sup>28 29</sup> Moreover, depression in this early period can  
4  
5 88 build up negative consequences in adult life through its impacts on career prospects and social  
6  
7 89 relationships.<sup>30 31</sup>

8  
9 90 Thus, tackling depression among university students is vital since most lifetime mental  
10  
11 91 disorders commence during the university age,<sup>32</sup> and their mental health has essential  
12  
13 92 ramifications for campus health services in particular and mental health policy-making in  
14  
15 93 general.<sup>33 34</sup> Put another way, from a public health standpoint, early detection and prevention  
16  
17 94 of mental health problems among young adults in higher education is paramount.  
18  
19 95 Comprehension of their salient psychological distress, namely depression, and its correlates,  
20  
21 96 would enable tailor-made screening and intervention programs to prevent mental health  
22  
23 97 defects in this population. This is integral for their educational performance and triumph in  
24  
25 98 their prospective profession as well as for the national advancement since they are future  
26  
27 99 leaders.

27 100 The prevalence of depression is induced by many factors, including study populations,  
28  
29 101 socio-demographics,<sup>16 35</sup> study sites,<sup>16 36</sup> diagnostic tools and sampling methods,<sup>36 37</sup> and socio-  
30  
31 102 cultural environments.<sup>16</sup> Contextualization of facets linked with depression thus is significant  
32  
33 103 for mitigation measures.

34 104 In Cambodia, little is known about social and behavioral determinants of depressive  
35  
36 105 symptoms among student populations. In 2012, a study on 1,943 students at 11 junior high and  
37  
38 106 high schools found that exposure to violence among community members, peers, or family was  
39  
40 107 a predictor for depressive symptoms in the students.<sup>38 39</sup> A 2013 study on a sample of 28  
41  
42 108 students at a Cambodian university found that life events, problems of everyday life, and  
43  
44 109 availability of social support were the main stress factors affecting students' life satisfaction.<sup>40</sup>  
45  
46 110 Moreover, exposure to daily hassles was a stress factor having a strong impact on students'  
47  
48 111 psychological and somatic responses. Nonetheless, no research has been conducted to examine  
49  
50 112 social and behavioral determinants of depression among Cambodian university students. This  
51  
52 113 study therefore intends to identify factors associated with depressive symptoms among  
53  
54 114 university students in Cambodia.

55 115

## 116 **METHODS**

### 117 **Study sites and population**

118 This cross-sectional study was conducted with students at the University of Battambang (UB) in  
119 Battambang province and the Royal University of Phnom Penh (RUPP) in the capital city of  
120 Cambodia in June and July 2015. Epi Info was used to calculate the sample size from the  
121 university student population of approximately 168,000.<sup>41</sup> The anticipated percentage  
122 frequency was not known, so 50% was put for the calculation to prevent any underestimated  
123 prevalence. Based on a 95% confidence level (CI) and a +5% margin of error, the minimum  
124 sample size required for this study was 767 students. Adjusted for 10% of incomplete  
125 responses, missing data, and rejection rate, the final minimum required sample size was 850  
126 students.

127

### 128 **Sampling and data collection procedure**

129 A multi-stage cluster sampling method was used to select the participants. First, the two  
130 universities were purposively selected, considering administration and logistic limitations. All  
131 departments of the selected universities were included in the study. In each department, non-  
132 proportion to sample size sampling method was used to select the sample from a name list  
133 provided by the department administrator to meet the required sample size. On the designated  
134 date of data collection, all selected students were approached by trained data collectors, and  
135 questionnaires and instructions were delivered to them. Students were informed that the  
136 survey concerned questions related to health, and they were asked for a written informed  
137 consent. The participants then completed the questionnaires by themselves.

138

### 139 **Questionnaire development and training**

140 We first developed a structured questionnaire in English and translated it into Khmer, the  
141 national language of Cambodia. Then, the Khmer questionnaire was back-translated into  
142 English by local experts to check its accuracy. The Khmer questionnaire was pretested with a  
143 sample of 20 students at RUPP to ensure that the wording and contents were culturally suitable  
144 and clearly understandable. We also received comments on the questionnaire from experts

1  
2  
3 145 working on health and education in Cambodia. The questionnaire was finalized based on their  
4  
5 146 feedback and findings from the piloting.  
6

7 147 All researchers spent two days to provide training on the study protocol and data  
8  
9 148 collection method to the data enumerators and supervisors. The training focused on building  
10  
11 149 familiarity with the study protocol and questionnaire, interview techniques, privacy assurance,  
12  
13 150 and confidentiality. It also addressed quality control strategies, such as rechecking and  
14  
15 151 reviewing the questionnaires after administration, and resolving issues that might arise during  
16  
17 152 the fieldwork. The data collection supervisors were instructed to perform regular reviews with  
18  
19 153 the data enumerators to monitor progress and settle any issues occurring during the process.  
20

## 21 154

### 22 155 **Variables and measurements**

#### 23 156 *Depressive symptoms*

25 157 Depressive symptoms were assessed by using the Center for Epidemiologic Studies Depression  
26  
27 158 scale (CES-D).<sup>42</sup> This scale consists of 20 questions addressing six symptoms of depression,  
28  
29 159 including depressed mood, guilt or worthlessness, helplessness or hopelessness, psychomotor  
30  
31 160 retardation, loss of appetite, and sleep disturbance experienced during the preceding week.  
32  
33 161 Each question is scored on a scale of 0 to 3 according to the frequency of the symptoms, and  
34  
35 162 the total CES-D score ranges from 0 to 60. To calculate the total score, four items (I felt I was  
36  
37 163 just as good as other people, I felt hopeful about the future, I was happy, and I enjoyed life)  
38  
39 164 were reverse coded. The criterion validity of the CES-D scale has been well established in  
40  
41 165 Western<sup>42</sup> and Asian<sup>43</sup> populations. We defined depressive symptoms as present when a  
42  
43 166 subject had a CES-D score of  $\geq 16$ . A cutoff value of  $\geq 23$  was also used to define severe  
44  
45 167 depressive state.<sup>44</sup>  
46

#### 47 169 *Socio-demographic characteristics, substance use, and sexual behaviors*

49 170 We adapted standardized tools from the most recent Cambodia Demographic and Health  
50  
51 171 Survey<sup>45</sup> as well as from our previous student and young people health surveys in Cambodia<sup>38 39</sup>  
52  
53 172 <sup>46-48</sup> to measure socioeconomic characteristics, sexual behaviors with different partners, and  
54  
55 173 substance use (alcohol, tobacco, and illicit drugs). Socio-demographic characteristics of the  
56  
57  
58  
59  
60



174 respondents included study site, gender, age, marital status, year of the study, living situations,  
175 perceived family economic status, and perceived academic performance.

176

### 177 *Health related behaviors*

178 We used the Health Behavior Survey,<sup>49</sup> which was designed as a broad survey of health-related  
179 behaviors and beliefs, components of the “national college health risk behavior survey”  
180 (1997),<sup>50</sup> and the Global School-based Student Health Survey.<sup>51</sup> Each health behavior area was  
181 addressed by only a limited number of items. For example, frequency of consumption of fast  
182 food in an average week was assessed by a question, “On average, how many times do you eat  
183 fast food per week?” with response options of 0 time, 1-2 times a week, and 3 or more times a  
184 week. Similar questions and response options were used to assess consumption of several  
185 other kinds of healthy and unhealthy food, such as high-fat snack or fruits/vegetables. Self-  
186 ratings were also used for some questions, such as perceived body size (rated from very  
187 overweight to very underweight), general health status (rated from very good to very poor),  
188 and problems with sleeping in the past 30 days (rated from none to severe).

189

### 190 *Adverse childhood experiences (ACEs)*

191 Five questions were adapted from the brief screening version of the Childhood Trauma  
192 Questionnaire to measure ACEs.<sup>52</sup> The five questions asked about the experiences of physical  
193 abuse, emotional abuse, sexual abuse, physical neglect, and emotional neglect during the time  
194 when they were growing up. The response options for each question ranged from (1) ‘never’ to  
195 (5) ‘very often.’ Participants who responded ‘never’ and ‘rarely’ were grouped together as  
196 those without ACEs. Participants who answered ‘sometimes,’ ‘often,’ and ‘very often’ were  
197 grouped together as those with ACEs.

198

### 199 *Self-rated health*

200 SF-12 Health Survey (SF-12) was used to measure self-rated health.<sup>53 54</sup> The SF-12 is a  
201 multipurpose short-form generic measure of health status. It is a subset of the larger SF-36 and  
202 monitors health in general and in specific populations. The SF-12 measures eight health

1  
2  
3 203 aspects, namely physical functioning, role limitations due to physical health problems, bodily  
4  
5 204 pain, general health, vitality (energy/fatigue), social functioning, role limitations due to  
6  
7 205 emotional problems, and mental health (psychological distress and psychological well-being).  
8  
9 206

## 10 207 **Data analyses**

11  
12 208 Double data entry was performed using EpiData version 3 (Odense, Denmark).  $\chi^2$  test, or  
13  
14 209 Fisher's exact test when the sample sizes were smaller than five in one cell, was used for  
15  
16 210 categorical variables and Student's *t*-test was used for continuous variables to compare socio-  
17  
18 211 demographic characteristics, health risk behaviors (sexual behaviors, substance use, eating  
19  
20 212 behaviors, body size, and problems with sleeping), self-rated health (SF-12), and ACEs among  
21  
22 213 students with depressive symptoms, defined by a CES-D score of  $\geq 16$ , to those without  
23  
24 214 depressive symptoms. The same comparisons were also made among students with and  
25  
26 215 without severe depressive symptoms, defined by a CES-D score of  $\geq 23$ .

27 216 To control for potential confounding factors, two multivariate logistic regression models  
28  
29 217 were constructed, one for depressive symptoms and the other for severe depressive symptoms.  
30  
31 218 In the multivariate models, we first included all variables significantly associated with the  
32  
33 219 outcome variables in the bivariate analyses at a level of *p*-value  $< 0.05$  simultaneously in the  
34  
35 220 models. Variables with a *p*-value  $> 0.05$  were then removed, and the models were refitted. The  
36  
37 221 steps were repeated until all *p*-values of the remaining variables were  $< 0.05$  in the final models.  
38  
39 222 Adjusted odds ratio (AOR) were obtained and presented with CI and *p*-values. SPSS version 22  
40  
41 223 (IBM Corporation, New York, USA) was used for all statistical analyses.  
42  
43 224

## 44 225 **Ethical considerations**

45 226 The National Ethics Committee for Health Research of the Ministry of Health, Cambodia,  
46  
47 227 approved the study protocol and materials (No. 191NECHR). Participation in this study was  
48  
49 228 voluntary. In the process of obtaining their written informed consent, participants were made  
50  
51 229 clear that they could refuse or discontinue their participation at any time and for any reason.  
52  
53 230 The confidentiality and privacy of the respondents were protected by administering the  
54  
55 231 questionnaires in a private premise and by excluding personal identifiers in the survey.  
56  
57  
58  
59  
60

232

233 **RESULTS**234 **Socio-demographic characteristics**

235 The study sample included 493 students (36.3%) from UB and 866 students (63.7%) from RUPP.

236 Of the total, 50.8% of the respondents were male, with a mean age of 21.3 years [standard

237 deviation (SD)=2.3]. The majority of the respondents (97.9%) were unmarried; and 43.4% were

238 living with their parents. Regarding their family economic status, 59.2% reported that their

239 family was neither rich nor poor. The proportion of students with depressive symptoms and

240 severe depressive symptoms were 50.6% and 19.6%, respectively.

241 Table 1 shows the comparisons of socio-demographic characteristics of students with

242 and without depressive symptoms. Compared to their comparison groups, students with

243 depressive symptoms were significantly more likely to be from UB ( $p=0.004$ ), to be from a

244 poorer family ( $p=0.002$ ), and to report poorer academic performance ( $p<0.001$ ). Similarly,

245 students with severe depressive symptoms were significantly more likely to be female

246 ( $p=0.002$ ), to be from a poorer family ( $p=0.04$ ), and to report poorer academic performance

247 ( $p<0.001$ ).

248

249 **Table 1** Comparisons of socio-demographic characteristics of university students with and without

250 depressive symptoms

| Characteristics     | Depressive symptoms <sup>†</sup> |                |                      | Severe depressive symptoms <sup>†</sup> |                |                      |
|---------------------|----------------------------------|----------------|----------------------|-----------------------------------------|----------------|----------------------|
|                     | No                               | Yes            | P-value <sup>‡</sup> | No                                      | Yes            | P-value <sup>‡</sup> |
| Study site          |                                  |                | 0.004                |                                         |                | 0.08                 |
| Battambang          | 218 (44.2)                       | 275 (55.8)     |                      | 384 (77.9)                              | 109 (22.1)     |                      |
| Phnom Penh          | 454 (52.4)                       | 412 (47.6)     |                      | 709 (81.9)                              | 157 (18.1)     |                      |
| Gender              |                                  |                | 0.20                 |                                         |                | 0.002                |
| Female              | 319 (47.7)                       | 350 (52.3)     |                      | 515 (77.0)                              | 154 (23.0)     |                      |
| Male                | 353 (51.2)                       | 337 (48.8)     |                      | 578 (83.8)                              | 112 (16.2)     |                      |
| Age (mean $\pm$ SD) | 21.3 $\pm$ 2.4                   | 21.4 $\pm$ 2.3 | 0.82                 | 21.4 $\pm$ 2.3                          | 21.1 $\pm$ 2.4 | 0.12                 |
| Marital status      |                                  |                | 0.34                 |                                         |                | 0.08                 |
| Unmarried           | 655 (49.2)                       | 675 (50.8)     |                      | 1066 (80.2)                             | 264 (19.8)     |                      |

|                                  |            |            |            |            |
|----------------------------------|------------|------------|------------|------------|
| Married                          | 17 (58.6)  | 12 (41.4)  | 27 (93.1)  | 2 (6.9)    |
| Year of study                    | 0.59       |            | 0.66       |            |
| 1                                | 240 (48.4) | 256 (51.6) | 394 (79.4) | 102 (20.6) |
| 2                                | 145 (51.6) | 136 (48.4) | 224 (79.7) | 57 (20.3)  |
| 3                                | 123 (49.0) | 128 (51.0) | 201 (80.1) | 50 (19.9)  |
| 4                                | 164 (49.5) | 167 (50.5) | 274 (82.8) | 57 (17.2)  |
| Currently living with            | 0.35       |            | 0.70       |            |
| Parents                          | 297 (49.9) | 298 (50.1) | 486 (81.7) | 109 (18.3) |
| Relatives                        | 81 (45.0)  | 99 (55.0)  | 139 (77.2) | 41 (22.8)  |
| Sibling                          | 87 (56.1)  | 68 (43.9)  | 124 (80.0) | 31 (20.0)  |
| Friend                           | 162 (50.2) | 161 (49.8) | 258 (79.9) | 65 (20.1)  |
| Spouse/partners                  | 10 (47.6)  | 11 (52.4)  | 19 (90.5)  | 2 (9.5)    |
| Alone                            | 26 (41.9)  | 36 (58.1)  | 50 (80.6)  | 12 (19.4)  |
| Other                            | 9 (39.1)   | 14 (60.9)  | 17 (73.9)  | 6 (26.1)   |
| Perceived family economic status | 0.002      |            | 0.04       |            |
| Well-off/quite well-off          | 248 (55.7) | 197 (44.3) | 374 (84.0) | 71 (16.0)  |
| Neither poor nor well-off        | 398 (47.0) | 448 (53.0) | 669 (71.1) | 177 (20.9) |
| Poor                             | 26 (38.2)  | 42 (61.8)  | 50 (73.5)  | 18 (26.5)  |
| Perceived academic performance   | <0.001     |            | <0.001     |            |
| Very good                        | 44 (77.2)  | 13 (22.8)  | 52 (91.2)  | 5 (5.8)    |
| Good                             | 180 (59.0) | 123 (40.6) | 263 (86.8) | 40 (13.2)  |
| Fairly good                      | 301 (50.5) | 295 (49.5) | 484 (81.2) | 112 (18.8) |
| Fair                             | 138 (37.7) | 228 (62.3) | 275 (75.1) | 91 (24.9)  |
| Poor                             | 9 (24.3)   | 28 (75.7)  | 19 (51.4)  | 18 (48.6)  |

251 *Abbreviation: SD, standard deviation.*

252 *Values are numbers of subjects (%) for categorical variables and means  $\pm$  standard deviation (SD) for*

253 *continuous variables.*

254 *\*Defined by a Center for Epidemiology Studies Depression Scale (CES-D) score of  $\geq 16$ .*

255 *†Defined by a CES-D score of  $\geq 23$ .*

256 *‡Chi-square test was used for categorical variables; independent Student's t-test was used for continuous*

257 *variables.*

258

## 259 Health risk behaviors

260 As shown in Table 2, compared to students without symptoms, students with symptoms were  
 261 significantly more probable to report having thought of ending life ( $p<0.001$  for both depressive  
 262 symptoms and severe depressive symptoms) and higher consumption of unhealthy food, such  
 263 as high-fat snack ( $p=0.001$  for depressive symptoms;  $p<0.001$  for severe depressive symptoms),  
 264 margarine, butter, or meat fat ( $p=0.02$  for depressive symptoms;  $p<0.001$  for severe depressive  
 265 symptoms). The students with depressive symptoms were significantly less likely to report  
 266 higher consumption of healthy food, such as fruits and vegetables ( $p=0.009$  for depressive  
 267 symptoms;  $p=0.007$  for severe depressive symptoms), or lean protein ( $p<0.001$  for depressive  
 268 symptoms;  $p=0.03$  for severe depressive symptoms). The students with depressive symptoms  
 269 were significantly more likely to report not having desert over the past week ( $p=0.003$  for  
 270 depressive symptoms;  $p=0.008$  for severe depressive symptoms). Moreover, the students with  
 271 depressive symptoms were significantly more likely to perceive that their body size was very  
 272 overweight or very underweight ( $p<0.001$  for both depressive symptoms and severe depressive  
 273 symptoms) and report having moderate or severe problems with sleeping in the past 30 days  
 274 ( $p<0.001$  for both depressive symptoms and severe depressive symptoms).

275  
 276 **Table 2** Comparisons of health risk behaviors among university students with and without depressive  
 277 symptoms

| Health and health risk behaviors      | Depressive symptoms <sup>†</sup> |            |                      | Severe depressive symptoms <sup>†</sup> |            |                      |
|---------------------------------------|----------------------------------|------------|----------------------|-----------------------------------------|------------|----------------------|
|                                       | No                               | Yes        | P-value <sup>‡</sup> | No                                      | Yes        | P-value <sup>‡</sup> |
| Current tobacco smokers               | 5 (33.3)                         | 10 (66.7)  |                      | 12 (80.0)                               | 3 (20.0)   | 0.97                 |
| Self-perception regarding alcohol use |                                  |            | 0.25                 |                                         |            | 0.004                |
| Non drinker                           | 425 (50.7)                       | 413 (49.3) |                      | 681 (81.3)                              | 157 (18.7) |                      |
| Occasional drinker                    | 247 (47.4)                       | 271 (52.6) |                      | 412 (78.7)                              | 106 (21.3) |                      |
| Regular drinker                       | 0 (0.0)                          | 3 (100)    |                      | 0 (0.0)                                 | 3 (100)    |                      |
| Current illicit drug users            | 0 (0.0)                          | 4 (100)    | 0.05                 | 1 (25.0)                                | 3 (75.0)   | 0.03                 |
| Condom use at last sex                | 39 (47.0)                        | 44 (53.0)  | 0.95                 | 73 (88.0)                               | 10 (12.0)  | 0.08                 |
| Diagnosed with an STI                 | 4 (40.0)                         | 6 (60.0)   | 0.75                 | 110 (84.0)                              | 21 (16.0)  | 0.67                 |
| Thought of ending life                | 40 (24.8)                        | 121 (75.2) | <0.001               | 84 (52.2)                               | 77 (47.8)  | <0.001               |



|                                           |            |            |            |            |
|-------------------------------------------|------------|------------|------------|------------|
| Slightly overweight                       | 161 (48.9) | 168 (51.1) | 247 (75.1) | 82 (24.9)  |
| Slightly underweight                      | 191 (49.6) | 194 (50.4) | 319 (82.9) | 66 (17.1)  |
| Very underweight                          | 18 (25.7)  | 52 (74.3)  | 44 (62.9)  | 26 (37.1)  |
| Problem with sleeping in the past 30 days |            |            | <0.001     | <0.001     |
| None                                      | 133 (61.9) | 82 (38.1)  | 194 (90.2) | 21 (9.8)   |
| Mild                                      | 283 (62.3) | 171 (37.7) | 409 (90.1) | 45 (9.9)   |
| Moderate                                  | 243 (41.4) | 344 (58.6) | 447 (76.1) | 140 (23.9) |
| Severe                                    | 13 (12.6)  | 90 (87.4)  | 43 (41.7)  | 60 (58.3)  |

278 *Abbreviations: STI, sexually transmitted infections.*

279 *Values are numbers of subjects (%).*

280 *\* Defined by a Center for Epidemiology Studies Depression Scale (CES-D) score of  $\geq 16$ .*

281 *† Defined by a CES-D score of  $\geq 23$ .*

282 *‡ Chi-square test was used or Fisher's exact test was used as appropriate.*

283

### 284 **Self-rated health (SF-12)**

285 The comparisons of self-rated health (SF-12) among students with and without depressive  
 286 symptoms and severe depressive symptoms are shown in Table 3. The students with depressive  
 287 symptoms were significantly more likely to perceive that their general health status was poor  
 288 ( $p < 0.001$  for both depressive symptoms and severe depressive symptoms). The students with  
 289 depressive symptoms were significantly more probable to report higher levels of limitation in  
 290 several daily activities, such as limitation in moderate activities ( $p < 0.001$  for depressive  
 291 symptoms;  $p = 0.02$  for severe depressive symptoms), climbing several flights of stairs ( $p < 0.001$   
 292 for depressive symptoms), or other kinds of activities in the past four weeks as a result of their  
 293 physical or emotional health problems ( $p < 0.001$  for both depressive symptoms and severe  
 294 depressive symptoms). Further, they reported higher levels of problems in several other  
 295 physical and emotional health aspects in the past four weeks, such as the feeling that they had  
 296 accomplished less than they would like ( $p < 0.001$  for both depressive symptoms and severe  
 297 depressive symptoms), pain interferes with their normal work ( $p < 0.001$  for both depressive  
 298 symptoms and severe depressive symptoms), having less energy ( $p < 0.001$  for both depressive  
 299 symptoms and severe depressive symptoms), down-hearted and blue ( $p < 0.001$  for both  
 300 depressive symptoms and severe depressive symptoms), and their physical health interferes  
 301 with their social acts ( $p < 0.001$  for both depressive symptoms and severe depressive symptoms).

302  
303 **Table 3** Comparisons of self-rated health (SF-12) among university students with and without depressive  
304 symptoms

| Self-rated health (SF-12)                                                             | Depressive symptoms |            | P-value <sup>‡</sup> | Severe depressive symptoms <sup>†</sup> |            | P-value <sup>‡</sup> |
|---------------------------------------------------------------------------------------|---------------------|------------|----------------------|-----------------------------------------|------------|----------------------|
|                                                                                       | No                  | Yes        |                      | No                                      | Yes        |                      |
| Self-perception on general health status                                              |                     |            | <0.001               |                                         |            | <0.001               |
| Very good                                                                             | 106 (64.2)          | 59 (35.8)  |                      | 147 (89.1)                              | 18 (10.9)  |                      |
| Good                                                                                  | 380 (58.5)          | 270 (41.5) |                      | 566 (87.1)                              | 84 (12.9)  |                      |
| Neither good nor poor                                                                 | 176 (38.0)          | 287 (62.0) |                      | 351 (75.8)                              | 112 (24.2) |                      |
| Poor                                                                                  | 10 (12.3)           | 71 (87.7)  |                      | 29 (35.8)                               | 52 (64.2)  |                      |
| Limitation in moderate activities on a typical day                                    |                     |            | <0.001               |                                         |            | 0.02                 |
| Greatly limited                                                                       | 20 (28.2)           | 51 (71.8)  |                      | 50 (70.4)                               | 21 (29.6)  |                      |
| Mildly limited                                                                        | 291 (45.6)          | 347 (54.4) |                      | 505 (79.2)                              | 133 (20.8) |                      |
| Not limited                                                                           | 361 (55.5)          | 289 (44.5) |                      | 538 (82.8)                              | 112 (17.2) |                      |
| Limitation in climbing several flights of stairs                                      |                     |            | <0.001               |                                         |            | 0.24                 |
| Greatly limited                                                                       | 64 (35.8)           | 115 (64.2) |                      | 140 (78.2)                              | 39 (21.8)  |                      |
| Mildly limited                                                                        | 323 (47.8)          | 353 (52.2) |                      | 536 (79.3)                              | 140 (20.7) |                      |
| Not limited                                                                           | 285 (56.5)          | 219 (43.5) |                      | 417 (82.7)                              | 87 (17.2)  |                      |
| Limitation in other kinds of activities in past 4 weeks                               | 271 (37.8)          | 446 (62.2) | <0.001               | 516 (72.0)                              | 201 (28.0) | <0.001               |
| Accomplished less than you would like in past 4 weeks as a result of emotional health | 377 (61.9)          | 232 (38.1) | <0.001               | 553 (50.6)                              | 197 (26.3) | <0.001               |
| Accomplished less than you would like in past 4 weeks as a result of physical health  | 304 (67.3)          | 148 (32.7) | <0.001               | 675 (74.4)                              | 232 (25.6) | <0.001               |
| Did activities less carefully than usual in past 4 weeks                              | 378 (41.8)          | 526 (58.2) | <0.001               | 677 (74.9)                              | 227 (25.1) | <0.001               |
| Pain interferes with your normal work in past 4 weeks                                 |                     |            | <0.001               |                                         |            | <0.001               |
| Not at all                                                                            | 141 (75.8)          | 45 (24.2)  |                      | 176 (94.6)                              | 10 (5.4)   |                      |



|                                                       |            |            |            |            |
|-------------------------------------------------------|------------|------------|------------|------------|
| A little bit                                          | 401 (57.6) | 295 (42.4) | 635 (91.2) | 61 (8.8)   |
| Moderately                                            | 106 (32.9) | 216 (31.4) | 216 (67.1) | 106 (32.9) |
| Quite a bit                                           | 23 (16.5)  | 116 (83.5) | 62 (44.6)  | 77 (55.4)  |
| Extremely                                             | 1 (6.3)    | 15 (93.8)  | 4 (25.0)   | 12 (75.0)  |
| Feeling calm and peaceful in past 4 weeks             |            |            | 0.33       | 0.06       |
| A lot of the time                                     | 22 (42.3)  | 30 (57.7)  | 38 (73.1)  | 14 (26.9)  |
| Most of the time                                      | 68 (53.5)  | 59 (46.5)  | 92 (72.9)  | 35 (27.6)  |
| A good bit of time                                    | 115 (50.9) | 111 (49.1) | 188 (83.2) | 38 (16.2)  |
| Some of the time                                      | 278 (46.8) | 316 (53.2) | 477 (80.3) | 117 (17.7) |
| A little of the time                                  | 170 (51.8) | 158 (48.2) | 274 (83.5) | 54 (16.5)  |
| None of the time                                      | 19 (59.4)  | 13 (40.6)  | 24 (75.0)  | 8 (25.0)   |
| Having a lot of energy in past 4 weeks                |            |            | <0.001     | <0.001     |
| A lot of the time                                     | 46 (61.3)  | 29 (38.7)  | 66 (88.0)  | 9 (12.0)   |
| Most of the time                                      | 111 (68.9) | 50 (31.1)  | 149 (92.5) | 12 (7.5)   |
| A good bit of time                                    | 245 (56.8) | 186 (43.2) | 383 (88.9) | 48 (11.1)  |
| Some of the time                                      | 207 (41.5) | 292 (58.5) | 364 (72.9) | 135 (27.1) |
| A little of the time                                  | 57 (33.7)  | 112 (66.3) | 116 (68.6) | 53 (31.4)  |
| None of the time                                      | 6 (25.0)   | 18 (75.0)  | 15 (62.5)  | 9 (37.5)   |
| Feeling down-hearted and blue in past 4 weeks         |            |            | <0.001     | <0.001     |
| A lot of the time                                     | 7 (21.9)   | 25 (78.1)  | 14 (43.8)  | 18 (56.3)  |
| Most of the time                                      | 8 (8.3)    | 88 (91.7)  | 36 (37.5)  | 60 (62.5)  |
| A good bit of the time                                | 42 (17.9)  | 171 (80.3) | 117 (54.9) | 96 (45.1)  |
| Some of the time                                      | 222 (46.7) | 253 (53.3) | 412 (86.7) | 63 (13.3)  |
| A little of the time                                  | 354 (71.5) | 141 (28.5) | 469 (94.7) | 26 (5.3)   |
| None of the time                                      | 39 (81.3)  | 9 (18.8)   | 45 (93.8)  | 3 (6.3)    |
| Physical health interferes social act in past 4 weeks |            |            | <0.001     | <0.001     |
| A lot of the time                                     | 4 (33.3)   | 8 (66.7)   | 6 (50.0)   | 6 (50.0)   |
| Most of the time                                      | 10 (23.3)  | 33 (76.7)  | 18 (41.9)  | 58 (58.1)  |
| Some of the time                                      | 146 (38.1) | 237 (61.9) | 275 (71.8) | 108 (28.2) |
| A little of the time                                  | 355 (53.7) | 306 (46.3) | 568 (85.9) | 93 (14.1)  |
| None of the time                                      | 157 (60.4) | 103 (39.6) | 226 (26.9) | 34 (13.2)  |

305 Values are numbers of subjects (%) for categorical variables.

306 \* Defined by a Center for Epidemiology Studies Depression Scale (CES-D) score of  $\geq 16$ .

307 † Defined by a CES-D score of  $\geq 23$ .

308 ‡ Chi-square test was used for categorical variables or Fisher's exact test was used as appropriate.

309

### 310 Adverse childhood experiences (ACEs)

311 Table 4 shows the comparisons of ACEs among students with and without depressive symptoms  
 312 and severe depressive symptoms. The students with depressive symptoms were significantly  
 313 more likely to report having been hit, slapped, or kicked by a parent or guardian ( $p < 0.001$  for  
 314 both depressive symptoms and severe depressive symptoms); that people in their family had  
 315 said hurtful or insulting things to them ( $p < 0.001$  for both depressive symptoms and severe  
 316 depressive symptoms); and that someone had tried to touch them or make them touch  
 317 him/her in a sexual way ( $p = 0.001$  for depressive symptoms;  $p < 0.001$  for severe depressive  
 318 symptoms). The students with depressive symptoms were significantly less likely to report that  
 319 there had been someone to take care of them and take them to medical care when they got  
 320 sick ( $p = 0.04$  for depressive symptoms;  $p = 0.03$  for severe depressive symptoms), and there had  
 321 been someone who helped them feel that they were loved and important ( $p = 0.03$  for  
 322 depressive symptoms;  $p < 0.001$  for severe depressive symptoms).

323

324 **Table 4** Comparisons of adverse childhood experiences among university students with and without  
 325 depressive symptoms

| Adverse childhood experiences                                       | Depressive symptoms* |            |          | Severe depressive symptoms† |            |          |
|---------------------------------------------------------------------|----------------------|------------|----------|-----------------------------|------------|----------|
|                                                                     | No                   | Yes        | P-value‡ | No                          | Yes        | P-value‡ |
| Had been hit, slapped, kicked, by a parent/guardian                 | 200 (38.2)           | 323 (61.8) | <0.001   | 384 (73.4)                  | 139 (26.6) | <0.001   |
| People in my family had said hurtful or insulting things to me      | 297 (39.0)           | 464 (61.0) | <0.001   | 558 (73.3)                  | 203 (26.7) | <0.001   |
| Someone had tried to touch me or make me touch them in a sexual way | 87 (39.2)            | 135 (60.8) | 0.001    | 159 (71.6)                  | 63 (28.4)  | <0.001   |

|    |                           |            |            |      |             |            |        |
|----|---------------------------|------------|------------|------|-------------|------------|--------|
| 1  |                           |            |            |      |             |            |        |
| 2  |                           |            |            |      |             |            |        |
| 3  | There had been someone    | 636 (50.2) | 632 (49.8) | 0.04 | 1028 (81.1) | 240 (18.9) | 0.03   |
| 4  | to take care me and take  |            |            |      |             |            |        |
| 5  | me to medical care when I |            |            |      |             |            |        |
| 6  | got sick                  |            |            |      |             |            |        |
| 7  |                           |            |            |      |             |            |        |
| 8  |                           |            |            |      |             |            |        |
| 9  | There had been someone    | 647 (50.1) | 644 (49.9) | 0.03 | 1050 (81.3) | 266 (19.6) | <0.001 |
| 10 | who helped me feel that I |            |            |      |             |            |        |
| 11 | was loved and important   |            |            |      |             |            |        |
| 12 |                           |            |            |      |             |            |        |
| 13 |                           |            |            |      |             |            |        |
| 14 |                           |            |            |      |             |            |        |

326 *Values are numbers of subjects (%).*

327 *\*Defined by a Center for Epidemiology Studies Depression Scale (CES-D) score of  $\geq 16$ .*

328 *†Defined by a CES-D score of  $\geq 23$ .*

329 *‡Chi-square test was used.*

330

### 331 Risk factors of depressive symptoms

332 The results of multivariate logistic analyses are shown in Table 5. After controlling for potential  
 333 confounding factors, the students with symptoms remained significantly more likely to report  
 334 poor academic performance (depressive symptoms: AOR=7.31, 95% CI=2.24-23.86; severe  
 335 depressive symptoms: AOR=7.38, 95% CI=1.75-10.94); having thought of ending life (depressive  
 336 symptoms: AOR=1.60, 95% CI=1.01-2.56; severe depressive symptoms: AOR=2.52, 95% CI=1.58-  
 337 4.01); higher consumption of unhealthy food, including high-fat snack, margarine, butter, or  
 338 meat fat (depressive symptoms: AOR=1.72, 95% CI=1.08-2.76; severe depressive symptoms:  
 339 AOR=2.13, 95% CI=1.15-3.95); and severe problem with sleeping in the past 30 days (depressive  
 340 symptoms: AOR=2.81, 95% CI=1.31-6.06; severe depressive symptoms: AOR=2.84, 95% CI=1.32-  
 341 6.13). They remained significantly less likely to perceive that their body size was slightly  
 342 underweight (depressive symptoms: AOR=0.54, 95% CI=0.29-0.99; severe depressive  
 343 symptoms: AOR=0.37, 95% CI=0.18-0.77).

344 Regarding self-rated health, the students with symptoms remained significantly more  
 345 likely to perceive that their general health status was poor (depressive symptoms: AOR=2.99,  
 346 95% CI=1.28-7.00; severe depressive symptoms: AOR=5.43, 95% CI=2.19-13.46), to report  
 347 higher level of limitation in moderate activities (depressive symptoms: AOR=0.30 (95% CI=0.16-  
 348 0.58), to report higher level of pain interference with their normal work (depressive symptoms:  
 349 AOR=10.43, 95% CI=1.05-10.94; severe depressive symptoms: AOR=10.02, 95% CI=1.99-9.28),

350 and to report higher level of feeling down-hearted and blue (depressive symptoms: AOR=6.69,  
351 95% CI=1.87-23.90; severe depressive symptoms: AOR=8.72, 95% CI=1.69-14.86).

352 For ACEs, they remained significantly more likely to report having been hit, slapped, or  
353 kicked by a parent or guardian (depressive symptoms: AOR=1.39, 95% CI=1.04-1.86); to report  
354 that people in their family had said hurtful or insulting things to them (depressive symptoms:  
355 AOR=1.82, 95% CI=1.37-2.42; severe depressive symptoms: AOR=2.18, 95% CI=1.46-3.24); and  
356 less likely to report that there had been someone to take care of them and take them to  
357 medical care when they got sick (depressive symptoms: AOR=0.51, 95% CI=0.30-0.86; severe  
358 depressive symptoms: AOR=0.26, 95% CI=0.13-0.52).

359  
360 **Table 5** Factors associated with depressive symptoms and severe depressive symptoms

| Variables in the final model                    | Depressive symptoms <sup>†</sup> |         | Severe depressive symptoms <sup>‡</sup> |         |
|-------------------------------------------------|----------------------------------|---------|-----------------------------------------|---------|
|                                                 | AOR (95% CI)                     | P-value | AOR (95% CI)                            | P-value |
| Perceived academic performance                  |                                  |         |                                         |         |
| Very good                                       | Reference                        |         | Reference                               |         |
| Good                                            | 2.28 (1.01-5.15)                 | 0.04    | 1.22 (0.35-4.19)                        | 0.76    |
| Fairly good                                     | 3.51 (1.58-7.78)                 | 0.002   | 2.15 (0.65-7.11)                        | 0.21    |
| Fair                                            | 5.30 (2.35-11.93)                | <0.001  | 2.52 (0.75-8.43)                        | 0.13    |
| Poor                                            | 7.31 (2.24-23.86)                | 0.001   | 7.38 (1.75-10.94)                       | 0.006   |
| Thought of ending life                          |                                  |         |                                         |         |
| No                                              | Reference                        |         | Reference                               |         |
| Yes                                             | 1.60 (1.01-2.56)                 | 0.04    | 2.52 (1.58-4.01)                        | <0.001  |
| Frequency of weekly high-fat snack consumption  |                                  |         |                                         |         |
| 0 time                                          | Reference                        |         | Reference                               |         |
| 1-2 times                                       | 0.99 (0.72-1.37)                 | 0.95    | 1.25 (0.78-1.99)                        | 0.36    |
| 3 times or more                                 | 1.72 (1.08-2.76)                 | 0.02    | 2.13 (1.15-3.95)                        | 0.02    |
| Frequency of weekly lean protein consumption    |                                  |         |                                         |         |
| 0 time                                          | Reference                        |         | Reference                               |         |
| 1-2 times                                       | 0.52 (0.34-0.79)                 | 0.002   | 0.69 (0.41-1.18)                        | 0.17    |
| 3 times or more                                 | 0.62 (0.38-0.96)                 | 0.04    | 0.80 (0.44-1.47)                        | 0.48    |
| Amount of margarine/butter/meat fat consumption |                                  |         |                                         |         |

|    |                                                       |                    |        |                   |        |
|----|-------------------------------------------------------|--------------------|--------|-------------------|--------|
| 1  |                                                       |                    |        |                   |        |
| 2  |                                                       |                    |        |                   |        |
| 3  | None/very little                                      |                    |        | Reference         |        |
| 4  |                                                       |                    |        |                   |        |
| 5  | Some                                                  |                    |        | 0.98 (0.66-1.46)  | 0.91   |
| 6  |                                                       |                    |        |                   |        |
| 7  | A lot                                                 |                    |        | 1.92 (1.02-3.64)  | 0.04   |
| 8  | Self-perception about body shape                      |                    |        |                   |        |
| 9  |                                                       |                    |        |                   |        |
| 10 | Very overweight                                       | Reference          |        |                   |        |
| 11 |                                                       |                    |        |                   |        |
| 12 | Slightly overweight                                   | 0.56 (0.31-1.07)   | 0.08   | 0.65 (0.32-1.14)  | 0.25   |
| 13 |                                                       |                    |        |                   |        |
| 14 | About right                                           | 0.58 (0.32-1.05)   | 0.07   | 0.45 (0.22-0.93)  | 0.03   |
| 15 |                                                       |                    |        |                   |        |
| 16 | Slightly underweight                                  | 0.54 (0.29-0.99)   | 0.04   | 0.37 (0.18-0.77)  | 0.008  |
| 17 |                                                       |                    |        |                   |        |
| 18 | Very underweight                                      | 0.92 (0.38-2.25)   | 0.86   | 0.38 (0.14-0.99)  | 0.04   |
| 19 | Problem with sleeping in the past 30 days             |                    |        |                   |        |
| 20 |                                                       |                    |        |                   |        |
| 21 | None                                                  | Reference          |        |                   |        |
| 22 |                                                       |                    |        |                   |        |
| 23 | Mild                                                  | 0.79 (0.53-1.19)   | 0.26   | 1.08 (0.55-2.16)  | 0.82   |
| 24 |                                                       |                    |        |                   |        |
| 25 | Moderate                                              | 1.06 (0.72-1.58)   | 0.76   | 1.45 (0.89-2.66)  | 0.26   |
| 26 |                                                       |                    |        |                   |        |
| 27 | Severe                                                | 2.81 (1.31-6.06)   | 0.008  | 2.84 (1.32-6.13)  | 0.008  |
| 28 | Self-perception on general health status              |                    |        |                   |        |
| 29 |                                                       |                    |        |                   |        |
| 30 | Very good                                             |                    |        |                   |        |
| 31 |                                                       |                    |        |                   |        |
| 32 | Good                                                  | 1.05 (0.68-1.64)   | 0.82   | 1.19 (0.60-2.38)  | 0.62   |
| 33 |                                                       |                    |        |                   |        |
| 34 | Fair                                                  | 1.58 (0.99-2.51)   | 0.05   | 1.47 (0.73-2.96)  | 0.28   |
| 35 |                                                       |                    |        |                   |        |
| 36 | Poor                                                  | 2.99 (1.28-7.00)   | 0.01   | 5.43 (2.19-13.46) | <0.001 |
| 37 | Limitation in moderate activities on a typical day    |                    |        |                   |        |
| 38 |                                                       |                    |        |                   |        |
| 39 | Greatly limited                                       | Reference          |        | Reference         |        |
| 40 |                                                       |                    |        |                   |        |
| 41 | Mildly limited                                        | 0.39 (0.20-0.74)   | 0.004  | 0.64 (0.29-1.34)  | 0.23   |
| 42 |                                                       |                    |        |                   |        |
| 43 | Not limited                                           | 0.30 (0.16-0.58)   | <0.001 | 0.63 (0.30-1.36)  | 0.24   |
| 44 | Pain interferes with your normal work in past 4 weeks |                    |        |                   |        |
| 45 |                                                       |                    |        |                   |        |
| 46 | Not at all                                            | Reference          |        | Reference         |        |
| 47 |                                                       |                    |        |                   |        |
| 48 | A little bit                                          | 1.68 (1.08-2.61)   | 0.02   | 1.01 (0.46-2.22)  | 0.99   |
| 49 |                                                       |                    |        |                   |        |
| 50 | Moderately                                            | 3.10 (1.89-5.10)   | <0.001 | 3.69 (1.68-7.11)  | 0.001  |
| 51 |                                                       |                    |        |                   |        |
| 52 | Quite a bit                                           | 4.14 (2.13-8.05)   | <0.001 | 4.68 (2.01-10.92) | <0.001 |
| 53 |                                                       |                    |        |                   |        |
| 54 | Extremely                                             | 10.43 (1.05-10.94) | 0.04   | 10.02 (1.99-9.28) | 0.005  |
| 55 | Feeling down-hearted and blue in past 4 weeks         |                    |        |                   |        |
| 56 |                                                       |                    |        |                   |        |
| 57 | None of the time                                      | Reference          |        | Reference         |        |
| 58 |                                                       |                    |        |                   |        |
| 59 | A little of the time                                  | 0.52 (0.63-3.66)   | 0.35   | 1.02 (0.24-4.29)  | 0.98   |
| 60 |                                                       |                    |        |                   |        |

|    |                                                                                       |                    |        |                   |        |
|----|---------------------------------------------------------------------------------------|--------------------|--------|-------------------|--------|
| 1  |                                                                                       |                    |        |                   |        |
| 2  |                                                                                       |                    |        |                   |        |
| 3  | Some of the time                                                                      | 3.42 (1.42-8.23)   | 0.006  | 1.83 (0.45-7.45)  | 0.40   |
| 4  | A good bit of the time                                                                | 7.70 (3.02-19.66)  | <0.001 | 6.01 (1.45-4.85)  | 0.01   |
| 5  | Most of the time                                                                      | 20.71 (6.47-66.37) | <0.001 | 9.04 (2.31-13.71) | 0.002  |
| 6  | A lot of the time                                                                     | 6.69 (1.87-23.90)  | 0.003  | 8.72 (1.69-14.86) | 0.01   |
| 7  |                                                                                       |                    |        |                   |        |
| 8  |                                                                                       |                    |        |                   |        |
| 9  |                                                                                       |                    |        |                   |        |
| 10 | Had been hit, slapped, kicked, by a parent/guardian                                   |                    |        |                   |        |
| 11 | No                                                                                    | Reference          |        | Reference         |        |
| 12 | Yes                                                                                   | 1.39 (1.04-1.86)   | 0.03   | 1.11 (0.75-1.65)  | 0.59   |
| 13 |                                                                                       |                    |        |                   |        |
| 14 | People in my family had said hurtful or insulting things to me                        |                    |        |                   |        |
| 15 | No                                                                                    | Reference          |        | Reference         |        |
| 16 | Yes                                                                                   | 1.82 (1.37-2.42)   | <0.001 | 2.18 (1.46-3.24)  | <0.001 |
| 17 |                                                                                       |                    |        |                   |        |
| 18 | There had been someone to take care of me and take me to medical care when I got sick |                    |        |                   |        |
| 19 | No                                                                                    | Reference          |        | Reference         |        |
| 20 | Yes                                                                                   | 0.51 (0.30-0.86)   | 0.01   | 0.26 (0.13-0.52)  | <0.001 |
| 21 |                                                                                       |                    |        |                   |        |
| 22 |                                                                                       |                    |        |                   |        |
| 23 |                                                                                       |                    |        |                   |        |
| 24 |                                                                                       |                    |        |                   |        |

25 361 *Abbreviations: AOR, adjusted odds ratio; CI, confidence interval.*

26 362 *\*Variables in the table were the ones that remained statistically significant in the final multivariate*  
 27 363 *logistic regression model after several steps of model fitting.*

28 364 *† Defined by a Center for Epidemiology Studies Depression Scale (CES-D) score of  $\geq 16$ .*

29 365 *‡ Defined by a CES-D score of  $\geq 23$ .*

30 366

## 31 367 **DISCUSSION**

32 368 This study unearthed a number of factors correlated with depressive symptoms among  
 33 369 university students in Cambodia. The salient factors comprised cultural and socio-economic  
 34 370 dimensions (gender, socio-economic background, and lack of general and medical care by  
 35 371 family), individual behaviors and attitudes (poor academic accomplishment, suicidal ideation,  
 36 372 consumption of unhealthy food, severe problem with sleeping, negative perception about their  
 37 373 body and their general health status, and limited physical activeness), and nurture-related  
 38 374 facets (physical violence and psychological abuse by family).

39 375 The bivariate outcomes display that students from the provincial university (UB) and a  
 40 376 poorer family were more susceptible to depressive symptoms. Likewise, students from a poorer  
 41 377 family and female students were more prone to severe depressive symptoms. Albeit not  
 42 378 manifesting in the multivariate model, these factors are corroborated by the existing  
 43 379 scholarship. Various studies revealed that university students from rural areas and low socio-

1  
2  
3 380 economic backgrounds were predisposed to higher depression.<sup>1 16 28 55 56</sup> This could be  
4  
5 381 explained by an economic situation where students with a rural background tended to stipulate  
6  
7 382 a poorer family status. Plus, financial vulnerability could further exacerbate depression in  
8  
9 383 students from low-income families. A meta-analysis of 60 studies unveiled that people in the  
10  
11 384 lowest socio-economic quintile had 1.81 the probability of depression compared with those in  
12  
13 385 the highest socio-economic quintile.<sup>57</sup> A global study on 17,348 university students from 23  
14  
15 386 high-, middle-, and low-income countries also uncovered that higher depressive symptoms  
16  
17 387 were recorded among students in low-income countries and economies with greater income  
18  
19 388 inequality.<sup>16</sup> The Cambodian economy has been growing rapidly in terms of income per capita;  
20  
21 389 yet, income gaps between the rich and the poor and between rural and urban areas remain  
22  
23 390 large.<sup>58</sup> The gaps in income and material growth, which typify economic conditions, may induce  
24  
25 391 people's mental health problems. In another word, poor economic status may bring about low  
26  
27 392 self-esteem and self-confidence, which would lead to depression.

27 393 Some research also discovered that female students were more at risk to depression.<sup>16</sup>  
28  
29 394<sup>59-62</sup> This might be due to social difficulties, physiological tenets, higher self-expectations, and  
30  
31 395 perceived lack of competence among female students.<sup>59</sup> In the Cambodian culture, young  
32  
33 396 women would perceive a great deal of challenges when living away from their family or parents  
34  
35 397 since they need to maintain the cultural behavior and meanwhile cope with independent  
36  
37 398 habitation. Over half (56.6%) of the student respondents in our study were not living with their  
38  
39 399 parents. Moreover, women tended to over-report medical and psychological symptoms as  
40  
41 400 indicated in a study on 440 undergraduate students in America.<sup>63</sup> Articulating their emotions  
42  
43 401 may be one strategy for dealing with stressful events.

44 402 Our multivariate results depict that students with depressive symptoms, regardless of  
45  
46 403 severity, tended to report poor academic performance, having thought of ending life, and  
47  
48 404 higher consumption of unhealthy food. These findings conform to a systematic review of 24  
49  
50 405 studies<sup>6</sup> and studies in Asia, such as China,<sup>7</sup> which pinpoint low scholastic merit and suicidal  
51  
52 406 ideation as consistent correlates of depression in university students probably as a culmination  
53  
54 407 of poor concentration and solitude. On the consumption of unhealthy food, the transition from  
55  
56 408 adolescence to adulthood, and thus the changes in lifestyle such as living arrangements and

1  
2  
3 409 independence, might have rendered university students to indulge in unhealthy food, as  
4  
5 410 pinpointed by a meta-analysis of 39 studies in China.<sup>7</sup> As afore-mentioned, more than half of  
6  
7 411 our sample were not living with their parents; therefore, it might have been hard for them to  
8  
9 412 maintain healthy daily food. Conversely, depression might have made students care-free about  
10  
11 413 themselves and consequently eat unhealthily.<sup>17</sup> This implies that nutrition education for both  
12  
13 414 physical and mental health, stressing healthy food for the body and mind, is imperative for  
14  
15 415 university students.

16 416 Students with depressive symptoms, regardless of magnitude, also tended to have  
17  
18 417 severe problem with sleeping and a negative perception about their body and their general  
19  
20 418 health status. This finding confirms the general perception among depressed people who are  
21  
22 419 not gratified with their body and health.<sup>17</sup> Further, depressed students were more likely to have  
23  
24 420 limited physical activeness, more pain interference with their normal work, and more dismay or  
25  
26 421 sorrow. This reflects scientific facts that lack of physical activities may cause blue feelings and  
27  
28 422 subsequently depression.<sup>64 65</sup> Therefore, physical exercises, such as sports, should be regularly  
29  
30 423 promoted among university students.

31 424 Finally, students with depressive symptoms were more likely to encounter physical  
32  
33 425 violence by their parent or guardian, psychological abuse by their family members (for both  
34  
35 426 students with depressive and severely depressive symptoms), and lack of general and medical  
36  
37 427 care by their family (for both students with depressive and severely depressive symptoms). As  
38  
39 428 for the physical violence and psychological abuse, this finding tends to acquiesce with a study in  
40  
41 429 Cambodia that postulates that exposure to violence within family is associated with depression  
42  
43 430 in high school students.<sup>38 39</sup> On the lack of general and medical care by family, a Chinese study  
44  
45 431 on 5,245 students at six universities found that students who had a poor parental relationship  
46  
47 432 were more vulnerable to depression.<sup>66</sup> Also, a global study on 17,348 university students from  
48  
49 433 23 high, middle-, and low-income countries iterated that university students with less  
50  
51 434 individualistic cultures, particularly in Asia, reported higher extents of depressive symptoms.<sup>16</sup>  
52  
53 435 Students of these cultures longed for more familial and societal ties and assistance, and thus  
54  
55 436 felt depressed once this social capital was unavailable.<sup>16</sup> This highlights a significant role of  
56  
57 437 family bonds and scaffolding in association with depression among university students. In an



1  
2  
3 438 Asian culture like Cambodian, family is an integral part for young adults and is pivotal for their  
4  
5 439 study and career advancement. Family environment and support, especially from parents,  
6  
7 440 affect students' emotional state. Poor parental relationships could cause negligence over  
8  
9 441 children, which could deteriorate their mental health. Thus, family atmosphere and support are  
10  
11 442 vital for mitigating mental health defects, such as depression, in university students.

12 443 A study on a sample of 2,671 respondents in nine provinces and a capital city in 2012  
13  
14 444 revealed that Cambodia greatly needs more and better counseling and mental health services.<sup>67</sup>  
15  
16 445 The study also pointed out the shortage of skilled professionals in the field of mental health,  
17  
18 446 particularly those with high clinical and counseling skills to treat mental disorders. In 2012,  
19  
20 447 Cambodia had only 49 trained psychiatrists and 45 psychiatric nurses working in mental health  
21  
22 448 facilities and private practices.<sup>67 68</sup> Many health staff lack training, supervision, and experience  
23  
24 449 in these areas. Only about 300 doctors completed basic mental healthcare training.<sup>69</sup> At  
25  
26 450 university level, the 2012 study called for more awareness raising for self-care and burnout  
27  
28 451 prevention and mental health counseling services for staff and students.<sup>67</sup> Given the paucity of  
29  
30 452 mental health services in general, let alone at universities, our findings fuel the needs for more  
31  
32 453 and better mental healthcare in Cambodia.

33 454 This study contains certain limitations. First, it examined students at only two public  
34  
35 455 universities, one in a city and the other in a province. Hence, its findings cannot be generalized  
36  
37 456 at a national level. Second, the cross-sectional design did not enable an establishment of the  
38  
39 457 causal linkages between depressive symptoms and the related factors. Given the temporal  
40  
41 458 order and the cross-sectional nature of the data, causal relationships between the variables  
42  
43 459 could not be derived. Potential bi-directionality of the associations could occur either way. For  
44  
45 460 instance, physical inactivity could cause depression. Nonetheless, the reverse could also be  
46  
47 461 true—that depression could lead to inactivity, and of course both could be true simultaneously,  
48  
49 462 where depressive symptoms worsen with physical inactivity, making physical activity less likely.  
50  
51 463 Third, this study employed self-reported data, which might have been subject to recall bias of  
52  
53 464 over-reporting and under-reporting. Nonetheless, the quality of the data was ensured by  
54  
55 465 thorough training of the enumerators and field supervisors on the study protocols and data  
56  
57 466 collection method. Finally, some of the measures, such as ACEs, were modified from other

1  
2  
3 467 research, and have not been validated in the Cambodian setting. Notwithstanding these  
4  
5 468 malfeasances, the findings of this study offer first and foremost implications for policy  
6  
7 469 development and future research in the Cambodian context.  
8  
9 470

10

## 11 471 **CONCLUSIONS**

12 472 This study identified social and behavioral factors associated with depressive symptoms among  
13  
14 473 Cambodian students at two universities. While causation could not be drawn between these  
15  
16 474 factors and depression, we surmise that these factors were inter-twined, and thus need to be  
17  
18 475 addressed in an integrated and holistic fashion.

19  
20 476 These findings render three major implications. First, given the current educational  
21  
22 477 reform and labor market that demand better quality and ergo more competition among  
23  
24 478 university students, the correlates of depressive symptoms could not be more critical for  
25  
26 479 tackling for the time being. Failure to ameliorate these factors would jeopardize the  
27  
28 480 qualification and career development of this populace and finally the human capital for nation-  
29  
30 481 building. Second, these findings warrant an acceleration of on-campus counseling services for  
31  
32 482 university students throughout the course of studentship. Efforts should be invested in  
33  
34 483 comprehensive screening and intervention programs to diagnose those susceptible students  
35  
36 484 early, offer immediate treatment, and cater appropriate support. Ultimately, the jurisdiction of  
37  
38 485 refining students' mental state should go beyond universities to families and pertinent  
39  
40 486 governmental bodies at large, provided we are to assist the young to overcome their academic  
41  
42 487 challenges and enjoy a prosperous post-graduation life. Further research could delve into  
43  
44 488 changing lifestyles and their associations with depressive symptoms among a larger sample of  
45  
46 489 university students.

47

48 491 **Acknowledgements** The authors thank KHANA's Senior Management Team, research  
49  
50 492 assistants, and the participants for their contribution to this study. Without their support, this  
51  
52 493 study would have been impossible.

53 494

1  
2  
3 495 **Contributions** SY, KP and TS conceived research questions, designed the study and developed  
4  
5 496 the research protocol and tools. SY and CN analyzed the data and interpreted the results and  
6  
7 497 drafted the manuscript. KP, PC and RY supported the protocol and tools development and were  
8  
9 498 responsible for training and data collection. All authors contributed to the writing and approved  
10  
11 499 the final manuscript.

12 500  
13  
14 501 **Funding** Data used for this analysis were collected as part of a larger study funded by the  
15  
16 502 United States Agency for International Development (USAID). The funder had no role in study  
17  
18 503 design, data collection and analyses, decision to publish, or preparation of the manuscript.

19 504  
20  
21 505 **Disclaimer** Content of this paper is the responsibility of the authors and does not reflect the  
22  
23 506 view of USAID or our respective institutions

24  
25 507  
26  
27 508 **Competing interests** None declared

28  
29 509  
30  
31 510 **Ethics approval** The National Ethics Committee for Health Research of the Ministry of Health,  
32  
33 511 Cambodia approved this study (Reference no. 082NECHR), and a written informed consent was  
34  
35 512 obtained from each participant.

36 513  
37  
38 514 **Data sharing statement** Data used for this analysis are available upon request from the  
39  
40 515 Principal Investigator (Dr. Siyan Yi) at [siyan@doctor.com](mailto:siyan@doctor.com). The data cannot be made publicly  
41  
42 516 available due to ethical restriction.

43 517  
44  
45 518 **REFERENCES**

- 46  
47 519 1. Bayram N, Bilgel N. The prevalence and socio-demographic correlations of depression,  
48  
49 520 anxiety and stress among a group of university students. *Soc Psychiatry Psychiatr*  
50  
51 521 *Epidemiol* 2008;43(8):667-672.

- 1  
2  
3 522 2. Stewart-Brown S, Evans J, Patterson J, et al. The health of students in institutes of higher  
4  
5 523 education: an important and neglected public health problem? *J Public Health Med*  
6  
7 524 2000;22(4):492-9.
- 8  
9 525 3. Tomoda A, Mori K, Kimura M, et al. One-year prevalence and incidence of depression  
10  
11 526 among first-year university students in Japan: a preliminary study. *Psychiatry Clin*  
12  
13 527 *Neurosci* 2000;54(5):583-8.
- 14 528 4. Voelker R. Mounting student depression taxing campus mental health services. *JAMA*  
15  
16 529 2003;289(16):2055-6.
- 17  
18 530 5. Wong JG, Cheung EP, Chan KK, et al. Web-based survey of depression, anxiety and stress  
19  
20 531 in first-year tertiary education students in Hong Kong. *Aust N Z J Psychiatry*  
21  
22 532 2006;40(9):777-82.
- 23 533 6. Ibrahim AK, Kelly SJ, Adams CE, et al. A systematic review of studies of depression  
24  
25 534 prevalence in university students. *J Psychiatr Res* 2013;47:391-400.
- 26  
27 535 7. Lei XY, Xiao LM, Liu YN, et al. Prevalence of Depression among Chinese University  
28  
29 536 Students: A Meta-Analysis. *PLoS One*. 2016;11(4):e0153454.
- 30  
31 537 8. Goebert D, Thompson D, Takeshita J, et al. Depressive symptoms in medical students  
32  
33 538 and residents: a multischool study. *Acad Med* 2009;84(2):236-41.
- 34 539 9. Vazquez F, Blanco V. Symptoms of depression and related factors among Spanish  
35  
36 540 university students. *Psychol Rep* 2006;99(2):583-90.
- 37  
38 541 10. Vazquez F, Blanco V. Prevalence of DSM-IV major depression among Spanish university  
39  
40 542 students. *J Am Coll Health* 2008;57(2):165-71.
- 41  
42 543 11. Chen L, Wang L, Qiu XH, et al. Depression among Chinese university students:  
43  
44 544 prevalence and socio-demographic correlates. *PLoS One*. 2013;8(3):e58379.
- 45 545 12. Shamsuddin K, Fadzil F, Ismail WS, et al. Correlates of depression, anxiety and stress  
46  
47 546 among Malaysian university students. *Asian J Psychiatr* 2013;6(4):318-23.
- 48  
49 547 13. Bayati A, Beigi M, Salehi M. Depression prevalence and related factors in Iranian  
50  
51 548 students. *Pak J Biol Sci* 2009;12(20):1371-5.

- 1  
2  
3 549 14. Garlow S, Rosenberg J, Moore J, et al. Depression, desperation, and suicidal ideation in  
4  
5 550 college students: results from the American Foundation for Suicide Prevention College  
6  
7 551 screening project at Emory University. *Depress Anxiety* 2008;25(6):482-8.
- 8  
9 552 15. Khan M, Mahmood S, Badshah A, et al. Prevalence of depression, anxiety and their  
10  
11 553 associated factors among medical students in Karachi, Pakistan. *J Pak Med Assoc* 2006  
12  
13 554 56(12):583-6.
- 14 555 16. Steptoe A, Tsuda A, Tanaka Y. Depressive symptoms, socio-economic background, sense  
15  
16 556 of control, and cultural factors in university students from 23 countries. *Int J Behav Med*  
17  
18 557 2007;14:97-107.
- 19  
20 558 17. National Collaborating Centre for Mental Health (UK). *Depression: The Treatment and*  
21  
22 559 *Management of Depression in Adults (Updated Edition)*. Leicester (UK): British  
23  
24 560 Psychological Society; 2010.
- 25 561 18. Hysenbegasi A, Hass S, Rowland C. The impact of depression on the academic  
26  
27 562 productivity of university students. *J Ment Health Policy Econ* 2005;8:145-51.
- 28  
29 563 19. Heiligenstein E, Guenther G, Hsu K, et al. Depression and academic impairment in  
30  
31 564 college students. *J Am Coll Health* 1996;45:59-64.
- 32 565 20. Meilman PW, Manley C, Gaylor MS, et al. Medical withdrawals from college for mental  
33  
34 566 health reasons and their relation to academic performance. *J Am Coll Health*  
35  
36 567 1992;40:217-23.
- 37  
38 568 21. Whitton S, Whisman M. Relationship satisfaction, instability and depression. *J Fam*  
39  
40 569 *Psychol* 2010;24:791-4.
- 41  
42 570 22. Jeon H. Depression and suicide. *J Korean Med Ass* 2011;54:370-5.
- 43  
44 571 23. Furr S, Westefeld J, McConnell G, et al. Suicide and depression among college students:  
45  
46 572 A decade later. *Profess Psychol* 2001;32(1):97-100.
- 47 573 24. Harvey S, Glozier N, Henderson M, et al. Depression and work performance: an  
48  
49 574 ecological study using web-based screening. *Occup Med* 2011;61:209-11.
- 50  
51 575 25. Mushquash AR, Stewart SH, Sherry SB, et al. Depressive symptoms are a vulnerability  
52  
53 576 factor for heavy episodic drinking: A short-term, four-wave longitudinal study of  
54  
55 577 undergraduate women. *Addict Behav* 2013;38:2180-6.

- 1  
2  
3 578 26. Buckner JD, Keough ME, Schmidt NB. Problematic alcohol and cannabis use among  
4  
5 579 young adults: The roles of depression and discomfort and distress tolerance. *Addict*  
6  
7 580 *Behav* 2007;32:1957-63.
- 8  
9 581 27. Adams TB, Wharton CM, Quilter L, et al. The association between mental health and  
10  
11 582 acute infectious illness among a national sample of 18-to 24-year-old college students. *J*  
12  
13 583 *Am Coll Health* 2008;56:657-64.
- 14 584 28. Bostanci M, Ozdel O, Oguzhanoglu NK, et al. Depressive symptomatology among  
15  
16 585 university students in Denizli, Turkey: Prevalence and sociodemographic correlates.  
17  
18 586 *Croat Med J* 2005;46:96-100.
- 19  
20 587 29. Eller T, Aluoja A, Vasar V, et al. Symptoms of anxiety and depression in Estonian medical  
21  
22 588 students with sleep problems. *Depress Anxiety* 2006;23:250-6.
- 23 589 30. Denise L, Terrie M, Avshalom C, et al. Psychiatric disorder in a birth cohort of young  
24  
25 590 adults: Prevalence, comorbidity, clinical significance, and new case incidence from ages  
26  
27 591 11-21. *J Consult Clin Psychol* 1996;64:552-62.
- 28  
29 592 31. Aalto-Setälä T, Marttunen M, Tuulio-Henriksson A, et al. One-month prevalence of  
30  
31 593 depression and other DSM-IV disorders among young adults. *Psychol Med* 2001;31:791-  
32  
33 594 801.
- 34 595 32. Kessler RC, Berglund P, Demler O, et al. Lifetime prevalence and age-of-onset  
35  
36 596 distributions of DSM-IV disorders in the National Comorbidity Survey Replication. *Arch*  
37  
38 597 *Gen Psychiatry* 2005;62(6):593-602.
- 39  
40 598 33. Kessler RC, Walters EE. Epidemiology of DSM-III-R major depression and minor  
41  
42 599 depression among adolescents and young adults in the National Comorbidity Survey.  
43  
44 600 *Depress Anxiety* 1998;7(1):3-14.
- 45 601 34. Vinas Poch F, Villar E, Caparros B, et al. Feelings of hopelessness in a Spanish university  
46  
47 602 population: Descriptive analysis and its relationship to adapting to university, depressive  
48  
49 603 symptomatology and suicidal ideation. *Soc Psychiatry Psychiatr Epidemiol*  
50  
51 604 2004;39(4):326-34.
- 52  
53  
54  
55  
56  
57  
58  
59  
60

- 1  
2  
3 605 35. Kaplan G, Shema S, Leite C. Socioeconomic determinants of psychological wellbeing: The  
4  
5 606 role of income, income change, and income sources during the course of 29 years. *Ann*  
6  
7 607 *Epidemiol* 2008;18:531-7.
- 8  
9 608 36. Weissman M, Bland R, Canino G, et al. Cross-national epidemiology of major depression  
10  
11 609 and bipolar disorder. *JAMA* 1996;276:293-9.
- 12  
13 610 37. Marsella A. Thoughts on cross-cultural studies on the epidemiology of depression. *Cult*  
14  
15 611 *Medicine Psychiatry* 1978;2:343-57.
- 16  
17 612 38. Yi S, Poudel KC, Yasuoka J, et al. Sibling care, school performance, and depression  
18  
19 613 among adolescent caretakers in Cambodia. *Asian J Psychiatr* 2012;5(2):132-6.
- 20  
21 614 39. Yi S, Poudel KC, Yasuoka J, et al. Exposure to violence in relation to depressive symptoms  
22  
23 615 among male and female adolescent students in Cambodia. *Soc Psychiatry Psychiatr*  
24  
25 616 *Epidemiol* 2013;48(3):397-405.
- 26  
27 617 40. Nou L. Investigating stress symptomatology among Cambodian university students. *Int*  
28  
29 618 *Rev Mod Sociol* 2013;39(1):133-64.
- 30  
31 619 41. Kwok KW, Chan S, Heng C, Kim S, Neth B, Thon V. Scoping Study: Research Capacities of  
32  
33 620 Cambodia's Universities. Phnom Penh: Development Research Forum in Cambodia;  
34  
35 621 2010.
- 36  
37 622 42. Radloff LS. The CES-D scale: A self-report depression scale for research in the general  
38  
39 623 population. *Appl Psychol Meas* 1977;1:385-401.
- 40  
41 624 43. Shima S, Shikano T, Kitamura T, et al. New self-rated scale for depression (in Japanese).  
42  
43 625 *Japanese J Clin Psychiatry* 1985;27:717-23.
- 44  
45 626 44. Wada K, Tanaka K, Theriault G, et al. Validity of the Center for Epidemiologic Studies  
46  
47 627 Depression Scale as a screening instrument of major depressive disorder among  
48  
49 628 Japanese workers. *Am J Ind Med* 2007;50:8-12.
- 50  
51 629 45. National Institute of Statistics, Directorate General for Health, and ORC Macro.  
52  
53 630 Cambodia Demographic and Health Survey 2014. Phnom Penh: National Institute of  
54  
55 631 Statistics and ORC Macro; 2014.

- 1  
2  
3 632 46. Ministry of Education, Youth, and Sport. Examining life experiences and HIV risks of  
4  
5 633 young entertainment workers in four Cambodian cities. Phnom Penh: 46. Ministry of  
6  
7 634 Education, Youth, and Sport; 2012.
- 8  
9 635 47. Yi S, Poudel KC, Yasuoka J, et al. Role of risk and protective factors in risky sexual  
10  
11 636 behavior among high school students in Cambodia. *BMC Public Health* 2010;10:477.
- 12  
13 637 48. Yi S, Poudel KC, Yasuoka J, et al. Risk vs. protective factors for substance use among  
14  
15 638 adolescents in Cambodia. *J Subst Use* 2011;16(1):14-26.
- 16  
17 639 49. Steptoe A, Wardle J. The European health and behaviour survey: The development of an  
18  
19 640 international study in health psychology. *Psychol Health* 1996;11:49-73.
- 20  
21 641 50. Center for Disease Control (CDC). Youth Risk Behavior Surveillance: National College  
22  
23 642 Health Risk Behavior Survey – United States, 1995. *MMWR* 1997;46(SS-6):1-54.
- 24  
25 643 51. Center for Disease Control (CDC)/World Health Organization (WHO). The Global School-  
26  
27 644 based Student Health Survey (GSHS). Atlanta, GA: CDC/WHO; 2012.
- 28  
29 645 52. Bernstein DP, Stein JA, Newcomb MD, et al. Development and validation of a brief  
30  
31 646 screening version of the Childhood Trauma Questionnaire. *Child Abuse Negl*  
32  
33 647 2003;27(2):169-190.
- 34  
35 648 53. Gandek BL, Ware JE, Aaronson NK, et al. Cross-validation of item selection and scoring  
36  
37 649 for the SF-12 Health Survey in nine countries: Results from the IQOLA Project.  
38  
39 650 International Quality of Life Assessment. *J Clin Epidemiol* 1998;51(11):1171-8.
- 40  
41 651 54. Ware JE, Kosinski MA, Keller SD. SF-36 Physical and Mental Health Summary Scales: A  
42  
43 652 User Manual. Boston: Health Institute, New England Medical Center; 1994.
- 44  
45 653 55. Andrews B, Wilding JM. The relation of depression and anxiety to life-stress and  
46  
47 654 achievement in students. *Br J Psychol* 2004;95:509-21.
- 48  
49 655 56. Eisenberg D, Gollust SE, Golberstein E, et al. Prevalence and correlates of depression,  
50  
51 656 anxiety, and suicidality among university students. *Am J Orthopsychiatry*  
52  
53 657 2007;77(4):534-2.
- 54  
55 658 57. Lorant V, Deliege D, Eaton W, et al. Socioeconomic inequalities in depression: A meta-  
56  
57 659 analysis. *Am J Epidemiol* 2003;157(2):98-112.



- 1  
2  
3 660 58. World Bank. Improving Macroeconomic and Financial Resilience: Cambodia Economic  
4 Update April 2016. Washington DC: World Bank; 2016.  
5 661  
6  
7 662 59. Noorbala AA, Mohammad K, Bagheri Yazdi SA, et al. Mental health survey of the adult  
8 population in Iran. *Br J Psychiatry* 2004;184:70-3.  
9 663  
10 664 60. Mikolajczyk R, Maxwell A, El Ansari W, Naydenova V, Stock C, Ilieva S, Dudziak U,  
11 Nagyova I. Prevalence of depressive symptoms in university students from Germany,  
12 Denmark, Poland and Bulgaria. *Soc Psychiatry Psychiatr Epidemiol* 2008;43(2):105-12.  
13 665  
14 666 61. Franko DL, Striegel-Moore RH, Bean J, et al. Self-reported symptoms of depression in  
15 late adolescence to early adulthood: A comparison of African-American and Caucasian  
16 females. *J Adolesc Health* 2005;37(6):526-9.  
17 667  
18 668 62. Wade TJ, Cairney J, Pevalin DJ. Emergence of gender differences in depression during  
19 adolescence: National panel results from three countries. *J Am Acad Child Adolesc*  
20 *Psychiatry* 2002;41(2):190-8.  
21 670  
22 671 63. Vrana S, Lauterbach D. Prevalence of traumatic events and post-traumatic psychological  
23 symptoms in a nonclinical sample of college students. *J Trauma Stress* 1994;7:289-302.  
24 672  
25 673 64. Teychenne M, Ball K, Salmon J. Physical activity and likelihood of depression in adults: A  
26 review. *Prev Med* 2008;46(5):397-411.  
27 674  
28 675 65. Azar D, Ball K, Salmon J, et al. The association between physical activity and depressive  
29 symptoms in young women: A review. *Ment Health Physic Act* 2008;1(2):82-8.  
30 676  
31 677 66. Chen L, Wang L, Qiu XH, et al. Depression among Chinese University Students:  
32 Prevalence and Socio-Demographic Correlates. *PLoS One* 2013;8(3):e58379.  
33 678  
34 679 67. Schunert T, Khann S, Kao S, et al. Cambodian Mental Health Survey 2012. Phnom Penh:  
35 Royal University of Phnom Penh; 2012.  
36 680  
37 681 68. McLaughlin D, Wickeri E (2012) Special Report: Mental Health and Human Rights in  
38 Cambodia. New York: Leitner Center for International Law and Justice; 2012.  
39 682  
40 683 69. Aberdein C, Zimmerman C. Access to mental health and psychosocial services in  
41 Cambodia by survivors of trafficking and exploitation: a qualitative study. *Int J Ment*  
42 *Health Syst* 2015;9:16.  
43 684  
44 685  
45 686  
46 687  
47 688

1  
2  
3 689  
4  
5 690  
6  
7 691  
8  
9 692  
10  
11 693  
12  
13 694  
14 695  
15  
16  
17  
18  
19  
20  
21  
22  
23  
24  
25  
26  
27  
28  
29  
30  
31  
32  
33  
34  
35  
36  
37  
38  
39  
40  
41  
42  
43  
44  
45  
46  
47  
48  
49  
50  
51  
52  
53  
54  
55  
56  
57  
58  
59  
60

For peer review only

STROBE Statement—Checklist of items that should be included in reports of *cross-sectional studies*

|                              | Item No | Recommendation                                                                                                                                                                                                                                                                                                                                                                                                                                                                                                               |
|------------------------------|---------|------------------------------------------------------------------------------------------------------------------------------------------------------------------------------------------------------------------------------------------------------------------------------------------------------------------------------------------------------------------------------------------------------------------------------------------------------------------------------------------------------------------------------|
| <b>Title and abstract</b>    | 1       | (a) Indicate the study's design with a commonly used term in the title or the abstract <a href="#">Confirmed (Lines 1-55)</a><br>(b) Provide in the abstract an informative and balanced summary of what was done and what was found. <a href="#">Confirmed (Lines 30-55)</a>                                                                                                                                                                                                                                                |
| <b>Introduction</b>          |         |                                                                                                                                                                                                                                                                                                                                                                                                                                                                                                                              |
| Background/rationale         | 2       | Explain the scientific background and rationale for the investigation being reported. <a href="#">Confirmed (Lines 71-110)</a>                                                                                                                                                                                                                                                                                                                                                                                               |
| Objectives                   | 3       | State specific objectives, including any prespecified hypotheses. <a href="#">Confirmed (Lines 110-112)</a>                                                                                                                                                                                                                                                                                                                                                                                                                  |
| <b>Methods</b>               |         |                                                                                                                                                                                                                                                                                                                                                                                                                                                                                                                              |
| Study design                 | 4       | Present key elements of study design early in the paper. <a href="#">Confirmed (Line 116)</a>                                                                                                                                                                                                                                                                                                                                                                                                                                |
| Setting                      | 5       | Describe the setting, locations, and relevant dates, including periods of recruitment, exposure, follow-up, and data collection. <a href="#">Confirmed (Line 1160-118)</a>                                                                                                                                                                                                                                                                                                                                                   |
| Participants                 | 6       | (a) Give the eligibility criteria, and the sources and methods of selection of participants. <a href="#">Confirmed (Lines 118-134)</a>                                                                                                                                                                                                                                                                                                                                                                                       |
| Variables                    | 7       | Clearly define all outcomes, exposures, predictors, potential confounders, and effect modifiers. Give diagnostic criteria, if applicable. <a href="#">Confirmed (Lines 152-201)</a>                                                                                                                                                                                                                                                                                                                                          |
| Data sources/<br>measurement | 8*      | For each variable of interest, give sources of data and details of methods of assessment (measurement). Describe comparability of assessment methods if there is more than one group. <a href="#">Confirmed (Lines 152-201)</a>                                                                                                                                                                                                                                                                                              |
| Bias                         | 9       | Describe any efforts to address potential sources of bias. <a href="#">Confirmed (Lines 136-150)</a>                                                                                                                                                                                                                                                                                                                                                                                                                         |
| Study size                   | 10      | Explain how the study size was arrived at. <a href="#">Confirmed (118-123)</a>                                                                                                                                                                                                                                                                                                                                                                                                                                               |
| Quantitative variables       | 11      | Explain how quantitative variables were handled in the analyses. If applicable, describe which groupings were chosen and why. <a href="#">Confirmed (Lines 203-219)</a>                                                                                                                                                                                                                                                                                                                                                      |
| Statistical methods          | 12      | (a) Describe all statistical methods, including those used to control for confounding. <a href="#">Confirmed (Lines 204-218)</a><br>(b) Describe any methods used to examine subgroups and interactions. <a href="#">(Not applicable)</a><br>(c) Explain how missing data were addressed <a href="#">(Not applicable)</a><br>(d) If applicable, describe analytical methods taking account of sampling strategy. <a href="#">(Not applicable)</a><br>(e) Describe any sensitivity analyses. <a href="#">(Not applicable)</a> |
| <b>Results</b>               |         |                                                                                                                                                                                                                                                                                                                                                                                                                                                                                                                              |
| Participants                 | 13*     | (a) Report numbers of individuals at each stage of study—eg numbers potentially eligible, examined for eligibility, confirmed eligible, included in the study, completing follow-up, and analysed. <a href="#">Confirmed (Lines 231)</a><br>(b) Give reasons for non-participation at each stage <a href="#">(Not applicable)</a><br>(c) Consider use of a flow diagram <a href="#">(Not applicable)</a>                                                                                                                     |
| Descriptive data             | 14*     | (a) Give characteristics of study participants (eg demographic, clinical, social) and information on exposures and potential confounders. <a href="#">Confirmed (Lines 231-242)</a><br>(b) Indicate number of participants with missing data for each variable of interest. <a href="#">(Not applicable)</a>                                                                                                                                                                                                                 |
| Outcome data                 | 15*     | Report numbers of outcome events or summary measures. <a href="#">Confirmed (235-236)</a>                                                                                                                                                                                                                                                                                                                                                                                                                                    |
| Main results                 | 16      | (a) Give unadjusted estimates and, if applicable, confounder-adjusted estimates and                                                                                                                                                                                                                                                                                                                                                                                                                                          |

their precision (eg, 95% confidence interval). Make clear which confounders were adjusted for and why they were included. [Confirmed \(237-242, 254-269, 279-296, 305-317, 326-353\)](#)

(b) Report category boundaries when continuous variables were categorized. [\(Not applicable\)](#)

(c) If relevant, consider translating estimates of relative risk into absolute risk for a meaningful time period. [\(Not applicable\)](#)

|                          |    |                                                                                                                                                                                                                       |
|--------------------------|----|-----------------------------------------------------------------------------------------------------------------------------------------------------------------------------------------------------------------------|
| Other analyses           | 17 | Report other analyses done—eg analyses of subgroups and interactions, and sensitivity analyses. <a href="#">Confirmed (320-325)</a>                                                                                   |
| <b>Discussion</b>        |    |                                                                                                                                                                                                                       |
| Key results              | 18 | Summarise key results with reference to study objectives. <a href="#">Confirmed (Lines 363-369)</a>                                                                                                                   |
| Limitations              | 19 | Discuss limitations of the study, taking into account sources of potential bias or imprecision. Discuss both direction and magnitude of any potential bias. <a href="#">Confirmed (Lines 449-464)</a>                 |
| Interpretation           | 20 | Give a cautious overall interpretation of results considering objectives, limitations, multiplicity of analyses, results from similar studies, and other relevant evidence. <a href="#">Confirmed (Lines 370-448)</a> |
| Generalisability         | 21 | Discuss the generalisability (external validity) of the study results. <a href="#">Confirmed (Lines 449-451)</a>                                                                                                      |
| <b>Other information</b> |    |                                                                                                                                                                                                                       |
| Funding                  | 22 | Give the source of funding and the role of the funders for the present study and, if applicable, for the original study on which the present article is based. <a href="#">Confirmed (Lines 496-498)</a>              |

\*Give information separately for exposed and unexposed groups.

**Note:** An Explanation and Elaboration article discusses each checklist item and gives methodological background and published examples of transparent reporting. The STROBE checklist is best used in conjunction with this article (freely available on the Web sites of PLoS Medicine at <http://www.plosmedicine.org/>, Annals of Internal Medicine at <http://www.annals.org/>, and Epidemiology at <http://www.epidem.com/>). Information on the STROBE Initiative is available at [www.strobe-statement.org](http://www.strobe-statement.org).

# BMJ Open

## Social and behavioral factors associated with depressive symptoms among university students in Cambodia: A cross-sectional study

|                                 |                                                                                                                                                                                                                                                                                                                                                                                                                                                                                             |
|---------------------------------|---------------------------------------------------------------------------------------------------------------------------------------------------------------------------------------------------------------------------------------------------------------------------------------------------------------------------------------------------------------------------------------------------------------------------------------------------------------------------------------------|
| Journal:                        | <i>BMJ Open</i>                                                                                                                                                                                                                                                                                                                                                                                                                                                                             |
| Manuscript ID                   | bmjopen-2017-019918.R1                                                                                                                                                                                                                                                                                                                                                                                                                                                                      |
| Article Type:                   | Research                                                                                                                                                                                                                                                                                                                                                                                                                                                                                    |
| Date Submitted by the Author:   | 17-May-2018                                                                                                                                                                                                                                                                                                                                                                                                                                                                                 |
| Complete List of Authors:       | Ngin, Chanrith; KHANA Center for Population Health Research; Royal University of Phnom Penh, Faculty of Development Studies<br>Pal, Khuondyla; KHANA Center for Population Health Research<br>Tuot, Sovannary; KHANA, Research Center<br>Chhoun, Pheak; KHANA, Research Center<br>Yi, Rosa; Royal University of Phnom Penh, Faculty of Development Studies<br>Yi, Siyan; KHANA, KHANA Center for Population Health Research; Touro University California, Center for Global Health Research |
| <b>Primary Subject Heading</b>: | Mental health                                                                                                                                                                                                                                                                                                                                                                                                                                                                               |
| Secondary Subject Heading:      | Public health, Epidemiology, Sociology, Health services research                                                                                                                                                                                                                                                                                                                                                                                                                            |
| Keywords:                       | Cross-sectional survey, Depressive symptoms, MENTAL HEALTH, Social and behavioral factors, University students, Cambodia                                                                                                                                                                                                                                                                                                                                                                    |
|                                 |                                                                                                                                                                                                                                                                                                                                                                                                                                                                                             |

SCHOLARONE™  
Manuscripts

only

1  
2  
3 1 **Social and behavioral factors associated with depressive symptoms among university**  
4 **students in Cambodia: A cross-sectional study**  
5  
6

7 3  
8  
9 4 Chanrith Ngin,<sup>1,2</sup> Khuondyla Pal,<sup>1</sup> Sovannary Tuot,<sup>1</sup> Pheak Chhoun,<sup>1</sup> Rosa Yi,<sup>2</sup> Siyan Yi<sup>1,3,\*</sup>

10 5 <sup>1</sup>KHANA Center for Population Health Research, Cambodia

11 6 <sup>2</sup>Faculty of Development Studies, Royal University of Phnom Penh, Cambodia

12 7 <sup>3</sup>Center for Global Health Research, Touro University California, USA  
13  
14  
15  
16  
17

18 9 \*Correspondence: Siyan Yi, No. 33, Street 71, P.O. Box 2311, Phnom Penh, Cambodia

19  
20 10 Tel: +855-23-211-505 / Fax: +855-23-214-049 / Email: [siyan@doctor.com](mailto:siyan@doctor.com)  
21  
22  
23  
24  
25  
26  
27  
28  
29  
30  
31  
32  
33  
34  
35  
36  
37  
38  
39  
40  
41  
42  
43  
44  
45  
46  
47  
48  
49  
50  
51  
52  
53  
54  
55  
56  
57  
58  
59  
60

## 30 ABSTRACT

31 **Objective** To explore social and behavioral factors associated with depressive symptoms among  
32 university students in Cambodia.

33 **Design** Cross-sectional study.

34 **Settings** Two public universities, one in the capital city of Phnom Penh and another in  
35 Battambang provincial town.

36 **Participants** This study included 1,359 students randomly selected from all departments in the  
37 two universities using a multi-stage cluster sampling method for a self-administered  
38 questionnaire survey in 2015.

39 **Primary outcome measure** Depressive symptoms measured by using the Center for  
40 Epidemiologic Studies Depression scale (CES-D).

41 **Results** The proportion of students with depressive symptoms and severe depressive symptoms  
42 were 50.6% and 19.6%, respectively. After adjustment in multivariate logistic regression  
43 analysis, depressive symptoms remained significantly associated with poor academic  
44 performance (AOR=7.31, 95% CI=2.24-23.86), higher consumption of unhealthy food  
45 (AOR=1.72, 95% CI=1.08-2.76), a negative self-perception about body shape (AOR=0.54, 95%  
46 CI=0.29-0.99) and general health status (AOR=2.99, 95% CI= 1.28-7.00), and limited physical  
47 activeness (AOR=0.30, 95% CI=0.16-0.58). Depressive symptoms also remained significantly  
48 associated with adverse childhood experiences including physical violence (AOR=1.39, 95%  
49 CI=1.04-1.86), psychological abuse (AOR=1.82, 95% CI=1.37-2.42), and lack of general and  
50 medical care (AOR=0.51, 95% CI=0.30-0.86) by family during childhood.

51 **Conclusions** The key factors associated with depressive symptoms were family-related and  
52 individual behaviors and attitudes. Thus, efforts should be invested in comprehensive screening  
53 and intervention programs to diagnose those vulnerable students early, offer immediate  
54 treatment, and cater appropriate support.

55

### 56 **Strengths and limitations of this study**

- 57 • This research is among a very few studies in which standardized tools are used and  
58 rigorous analyses are performed.

- 1  
2  
3 59 • It included a large sample of students randomly selected from all departments in two  
4 public universities – one in the capital city and the other in a provincial town – using a  
5 60 multi-stage cluster sampling method.  
6  
7 61  
8  
9 62 • Limitations of the study, however, included the representativeness of the study sample,  
10 the cross-sectional nature of the data that limits causation inferences, unknown validity  
11 63 of the scales used to measure important constructs in Cambodian contexts, and  
12 64 potential bias of self-reported measures.  
13  
14 65  
15  
16 66  
17

## 18 67 INTRODUCTION

19  
20 68 Several studies have suggested that the aspects of mental health among university students are  
21 69 considerably poorer than that of their peers in the general population.<sup>1-5</sup> Depression is one of  
22 the most prevalent mental health problems among university students, and the prevalence is  
23 70 rising.<sup>6-7</sup> There are varied prevalence estimates of depressive symptoms among university  
24 71 students, ranging from in the area of 10%<sup>8-11</sup> to in the region of 20%<sup>12</sup> and up to 40% and  
25 72 80%.<sup>13-15</sup> However, the mean prevalence of depression in university students stands at 30.6%.<sup>6</sup>  
26  
27 73  
28 74 University students are in a critical period of life since they transition from adolescence to  
29 75 adulthood, which requires them to make many major decisions. During this period, they  
30 76 encounter tremendous pressures, chiefly from economic stress, academic demands,  
31 77 interpersonal relationships, and struggles with making crucial decisions.<sup>16</sup>  
32  
33 78

34 79 Depression manifests in a wide range of symptoms, encompassing sleep and eating  
35 80 disturbances, lack of self-care, poor concentration, anxiety, and disinterest in everyday  
36 81 activities.<sup>17</sup> For university students, depression is correlated with poor academic  
37 82 achievements;<sup>18</sup> drop-out;<sup>19-20</sup> relationship instability;<sup>21</sup> suicidal ideation, attempts, and  
38 83 commitments;<sup>18-22-23</sup> poor work performance;<sup>24</sup> substance abuse;<sup>25-26</sup> acute infectious  
39 84 illnesses;<sup>27</sup> and poor physical and mental health in general.<sup>28-29</sup> Moreover, depression in this  
40 85 early period can build up negative consequences in adult life through its impacts on career  
41 86 prospects and social relationships.<sup>30-31</sup>  
42  
43 87

44 88 Thus, tackling depression among university students is vital since most lifetime mental  
45 89 disorders commence during the university age,<sup>32</sup> and their mental health has essential  
46  
47  
48  
49  
50  
51  
52



1  
2  
3 88 ramifications for campus health services in particular and mental health policy-making in  
4  
5 89 general.<sup>33 34</sup> Put another way, from a public health standpoint, early detection and prevention  
6  
7 90 of mental health problems among young adults in higher education is paramount.  
8  
9 91 Comprehension of their salient psychological distress, namely depression, and its correlates,  
10  
11 92 would enable tailor-made and early screening and intervention programs to reduce mental  
12  
13 93 health problems in this population. This is integral for their educational performance and  
14  
15 94 triumph in their prospective profession as well as for the national advancement since they are  
16  
17 95 future leaders.

18 96 The prevalence of depression is induced by many factors, including study populations,  
19  
20 97 socio-demographics,<sup>16 35</sup> study sites,<sup>16 36</sup> diagnostic tools and sampling methods,<sup>36 37</sup> and socio-  
21  
22 98 cultural environments.<sup>16</sup> Contextualization of facets linked with depression thus is significant  
23  
24 99 for mitigation measures.

25 100 In Cambodia, little is known about social and behavioral determinants of depressive  
26  
27 101 symptoms among student populations. In 2012, a study on 1,943 students at 11 junior high and  
28  
29 102 high schools found that exposure to violence among community members, peers, or family was  
30  
31 103 a predictor for depressive symptoms in the students.<sup>38 39</sup> A 2013 qualitative study on a sample  
32  
33 104 of 28 students at a Cambodian university found that life events, problems of everyday life, and  
34  
35 105 availability of social support were the main stress factors affecting students' life satisfaction.<sup>40</sup>  
36  
37 106 Moreover, exposure to daily hassles was a stress factor having a strong impact on students'  
38  
39 107 psychological and somatic responses. Nonetheless, no research has been conducted to examine  
40  
41 108 social and behavioral determinants of depression among Cambodian university students. This  
42  
43 109 study therefore intends to identify factors associated with depressive symptoms among  
44  
45 110 university students in Cambodia.

46 111

## 47 112 **METHODS**

### 48 113 **Study sites and population**

49 114 This cross-sectional study was conducted with students at the University of Battambang (UB) in  
50  
51 115 Battambang province and the Royal University of Phnom Penh (RUPP) in the capital city of  
52  
53 116 Cambodia in June and July 2015. Epi Info (Centers for Disease Control and Prevention, Atlanta,  
54  
55  
56  
57  
58  
59  
60

1  
2  
3 117 GA) was used to calculate the sample size from the university student population of  
4  
5 118 approximately 168,000.<sup>41</sup> The anticipated percentage frequency was not known, so 50% was  
6  
7 119 put for the calculation to prevent any underestimated prevalence. Based on a 95% confidence  
8  
9 120 interval (CI) and a +5% margin of error, the minimum sample size required for this study was  
10  
11 121 767 students. Adjusted for 10% of incomplete responses, missing data, and rejection rate, the  
12  
13 122 final minimum required sample size was 850 students.  
14  
15

123

### 124 **Patient and public involvement**

125 The development of the research questions and outcome measures was informed by university  
126 students' priorities, experience, and preferences gathered through consultative meetings with  
127 representatives of students, faculty members, and school administrators. The workshops aimed  
128 to collect inputs from the representatives for designing the study and developing the study  
129 protocol and materials. The representatives were also invited to participate in the study finding  
130 dissemination workshops in each participating university.  
131

131

### 132 **Sampling and data collection procedure**

133 A multi-stage cluster sampling method was used to select the participants. First, the two  
134 universities were purposively selected, considering administration and logistic limitations. All  
135 departments of the selected universities were included in the study. In each department, non-  
136 proportion to sample size sampling method was used to select the sample from a name list  
137 provided by the department administrator to meet the required sample size. On the designated  
138 date of data collection, all selected students were approached by trained data collectors with  
139 support from a school administrator. Questionnaires and instructions were then distributed to  
140 them in a classroom for self-administration, which took approximately 30min to complete. The  
141 participants then completed the questionnaires by themselves.  
142

142

### 143 **Questionnaire development and training**

144 We first developed a structured questionnaire in English and translated it into Khmer, the  
145 national language of Cambodia. Then, the Khmer questionnaire was back-translated into

1  
2  
3 146 English by a local expert to check its accuracy. The Khmer questionnaire was pretested with a  
4  
5 147 sample of 20 students at RUPP to ensure that the wording and contents were culturally suitable  
6  
7 148 and clearly understandable. We also received comments on the questionnaire from experts  
8  
9 149 working on health and education in Cambodia. The questionnaire was finalized based on their  
10  
11 150 feedback and findings from the pretest.

12  
13 151 A two-day training on the study protocol and data collection methods was provided to  
14  
15 152 the data enumerators and supervisors. The training focused on building familiarity with the  
16  
17 153 study protocol and questionnaire, interview techniques, privacy assurance, and confidentiality.  
18  
19 154 It also addressed quality control strategies, such as rechecking and reviewing the  
20  
21 155 questionnaires after administration, and resolving issues that might arise during the fieldwork.  
22  
23 156 The data collection supervisors were instructed to perform regular reviews with the data  
24  
25 157 enumerators to monitor progress and settle any issues occurring during the process.  
26

25 158

## 27 159 **Variables and measurements**

### 29 160 *Depressive symptoms*

30  
31 161 Depressive symptoms were assessed by using the Center for Epidemiologic Studies Depression  
32  
33 162 scale (CES-D).<sup>42</sup> This scale consists of 20 questions addressing six symptoms of depression,  
34  
35 163 including depressed mood, guilt or worthlessness, helplessness or hopelessness, psychomotor  
36  
37 164 retardation, loss of appetite, and sleep disturbance experienced during the preceding week.  
38  
39 165 Each question is scored on a scale of 0 to 3 according to the frequency of the symptoms, and  
40  
41 166 the total CES-D score ranges from 0 to 60. To calculate the total score, four items (I felt I was  
42  
43 167 just as good as other people, I felt hopeful about the future, I was happy, and I enjoyed life)  
44  
45 168 were reverse coded. The criterion validity of the CES-D scale has been well established in  
46  
47 169 Western<sup>42</sup> and Asian<sup>43</sup> populations. We defined depressive symptoms as present when a  
48  
49 170 subject had a CES-D score of  $\geq 16$ . A cutoff value of  $\geq 23$  was also used to define severe  
50  
51 171 depressive state.<sup>44</sup>

51 172

### 53 173 *Socio-demographic characteristics, substance use, and sexual behaviors*

1  
2  
3 174 We adapted standardized tools from the most recent Cambodia Demographic and Health  
4  
5 175 Survey<sup>45</sup> as well as from our previous student and young people health surveys in Cambodia<sup>38 39</sup>  
6  
7 176 <sup>46-48</sup> to measure socioeconomic characteristics, sexual behaviors with different partners, and  
8  
9 177 substance use (alcohol, tobacco, and illicit drugs). Socio-demographic characteristics of the  
10  
11 178 respondents included study site, gender, age, marital status, academic year, living situations,  
12  
13 179 perceived family economic status, and perceived academic performance.  
14  
15 180

### 16 181 *Health related behaviors*

17  
18 182 We used the Health Behavior Survey,<sup>49</sup> which was designed as a broad survey of health-related  
19  
20 183 behaviors and beliefs, components of the “National College Health Risk Behavior Survey”  
21  
22 184 (1997),<sup>50</sup> and the Global School-based Student Health Survey.<sup>51</sup> Each health behavior area was  
23  
24 185 addressed by only a limited number of items. For example, frequency of consumption of fast  
25  
26 186 food in an average week was assessed by a question, “On average, how many times do you eat  
27  
28 187 fast food per week?” with response options of 0 time, 1-2 times a week, and 3 or more times a  
29  
30 188 week. Similar questions and response options were used to assess consumption of several  
31  
32 189 other kinds of healthy and unhealthy food, such as high-fat snack or fruits/vegetables. Self-  
33  
34 190 ratings were also used for some questions, such as perceived body size (rated from very  
35  
36 191 overweight to very underweight) and general health status (rated from very good to very poor).  
37

### 38 193 *Adverse childhood experiences (ACEs)*

39  
40 194 Five questions were adapted from the brief screening version of the Childhood Trauma  
41  
42 195 Questionnaire to measure ACEs.<sup>52</sup> The five yes/no questions asked about the experiences of  
43  
44 196 physical abuse, emotional abuse, sexual abuse, physical neglect, and emotional neglect during  
45  
46 197 childhood.  
47

### 48 49 199 *Self-rated health*

50  
51 200 SF-12 Health Survey (SF-12) was used to measure self-rated health.<sup>53 54</sup> The SF-12 is a  
52  
53 201 multipurpose short-form generic measure of health status. It is a subset of the larger SF-36 and  
54  
55 202 monitors health in general and in specific populations. The SF-12 measures eight health  
56  
57  
58  
59  
60

1  
2  
3 203 aspects, namely physical functioning, role limitations due to physical health problems, bodily  
4  
5 204 pain, general health, vitality (energy/fatigue), social functioning, role limitations due to  
6  
7 205 emotional problems, and mental health (psychological distress and psychological well-being).  
8  
9 206

### 10 207 **Data analyses**

11  
12 208 Double data entry was performed using EpiData version 3 (Odense, Denmark).  $\chi^2$  test, or  
13  
14 209 Fisher's exact test when a sample size was smaller than five in one cell, was used for categorical  
15  
16 210 variables, and Student's *t*-test was used for continuous variables to compare socio-  
17  
18 211 demographic characteristics, health risk behaviors (sexual behaviors, substance use, and eating  
19  
20 212 behaviors), self-rated health (SF-12), and ACEs among students with depressive symptoms,  
21  
22 213 defined by a CES-D score of  $\geq 16$ , to those without depressive symptoms. The same comparisons  
23  
24 214 were also made among students with and without severe depressive symptoms, defined by a  
25  
26 215 CES-D score of  $\geq 23$ .

27 216 In multivariate models, we first included all variables significantly associated with  
28  
29 217 depressive symptoms in the bivariate analyses at a level of *p*-value  $< 0.05$  simultaneously in the  
30  
31 218 models. Variables with a *p*-value  $> 0.05$  were then removed, and the models were refitted. The  
32  
33 219 steps were repeated until all *p*-values of the remaining variables were  $< 0.05$  in the final models.  
34  
35 220 Adjusted odds ratio (AOR) were obtained and presented with CI and *p*-values. SPSS version 22  
36  
37 221 (IBM Corporation, New York) was used for all statistical analyses.  
38  
39 222

### 40 223 **Ethical considerations**

41 224 The National Ethics Committee for Health Research of the Ministry of Health, Cambodia,  
42  
43 225 approved the study protocol and materials (No. 191NECHR). Participation in this study was  
44  
45 226 voluntary. In the process of obtaining a written informed consent, students were made clear  
46  
47 227 that they could refuse or discontinue their participation at any time and for any reason. The  
48  
49 228 confidentiality and privacy of the respondents were protected by administering the  
50  
51 229 questionnaires in a private premise and by excluding personal identifiers from the data and  
52  
53 230 field notes. After completing the survey, each participant received a small gift (costing  
54  
55 231 approximately \$US 2.0) for their time compensation.  
56  
57  
58  
59  
60

232

233 **RESULTS**234 **Socio-demographic characteristics**

235 The study sample included 493 students (36.3%) from UB and 866 students (63.7%) from RUPP.  
 236 About half (50.8%) of the respondents were male, with a mean age of 21.3 years [standard  
 237 deviation (SD)=2.3]. Less than 2.0% ( $n= 26$ ) of the students initially selected for the study  
 238 declined the participation, mostly due to their time constrains. They were then replaced by the  
 239 next gender-matched student in the student name list. The majority of the respondents (97.9%)  
 240 were unmarried, and 43.4% were living with their parents. Regarding their family economic  
 241 status, 59.2% reported that their family was neither rich nor poor. The proportion of students  
 242 with depressive symptoms and severe depressive symptoms were 50.6% and 19.6%,  
 243 respectively.

244 Table 1 that a significantly higher proportion of students with depressive symptoms  
 245 were from UB ( $p=0.004$ ) and from a poorer family ( $p=0.002$ ) and reported poorer academic  
 246 performance ( $p<0.001$ ). Similarly, a significantly higher proportion of students with severe  
 247 depressive symptoms were female ( $p=0.002$ ) and from a poorer family ( $p=0.04$ ) and reported  
 248 poorer academic performance ( $p<0.001$ ).

249

250 **Table 1** Comparisons of socio-demographic characteristics of university students with and without  
 251 depressive symptoms

| Characteristics     | Depressive symptoms <sup>†</sup> |                |                      | Severe depressive symptoms <sup>†</sup> |                |                      |
|---------------------|----------------------------------|----------------|----------------------|-----------------------------------------|----------------|----------------------|
|                     | No                               | Yes            | P-value <sup>‡</sup> | No                                      | Yes            | P-value <sup>‡</sup> |
| Study site          |                                  |                | 0.004                |                                         |                | 0.08                 |
| Battambang          | 218 (44.2)                       | 275 (55.8)     |                      | 384 (77.9)                              | 109 (22.1)     |                      |
| Phnom Penh          | 454 (52.4)                       | 412 (47.6)     |                      | 709 (81.9)                              | 157 (18.1)     |                      |
| Gender              |                                  |                | 0.20                 |                                         |                | 0.002                |
| Female              | 319 (47.7)                       | 350 (52.3)     |                      | 515 (77.0)                              | 154 (23.0)     |                      |
| Male                | 353 (51.2)                       | 337 (48.8)     |                      | 578 (83.8)                              | 112 (16.2)     |                      |
| Age (mean $\pm$ SD) | 21.3 $\pm$ 2.4                   | 21.4 $\pm$ 2.3 | 0.82                 | 21.4 $\pm$ 2.3                          | 21.1 $\pm$ 2.4 | 0.12                 |
| Marital status      |                                  |                | 0.34                 |                                         |                | 0.08                 |

|                                  |            |            |             |            |
|----------------------------------|------------|------------|-------------|------------|
| Unmarried                        | 655 (49.2) | 675 (50.8) | 1066 (80.2) | 264 (19.8) |
| Married                          | 17 (58.6)  | 12 (41.4)  | 27 (93.1)   | 2 (6.9)    |
| Academic year                    |            |            | 0.59        | 0.66       |
| 1                                | 240 (48.4) | 256 (51.6) | 394 (79.4)  | 102 (20.6) |
| 2                                | 145 (51.6) | 136 (48.4) | 224 (79.7)  | 57 (20.3)  |
| 3                                | 123 (49.0) | 128 (51.0) | 201 (80.1)  | 50 (19.9)  |
| 4                                | 164 (49.5) | 167 (50.5) | 274 (82.8)  | 57 (17.2)  |
| Currently living with            |            |            | 0.35        | 0.70       |
| Parents                          | 297 (49.9) | 298 (50.1) | 486 (81.7)  | 109 (18.3) |
| Relatives                        | 81 (45.0)  | 99 (55.0)  | 139 (77.2)  | 41 (22.8)  |
| Sibling                          | 87 (56.1)  | 68 (43.9)  | 124 (80.0)  | 31 (20.0)  |
| Friend                           | 162 (50.2) | 161 (49.8) | 258 (79.9)  | 65 (20.1)  |
| Spouse/partners                  | 10 (47.6)  | 11 (52.4)  | 19 (90.5)   | 2 (9.5)    |
| Alone                            | 26 (41.9)  | 36 (58.1)  | 50 (80.6)   | 12 (19.4)  |
| Other                            | 9 (39.1)   | 14 (60.9)  | 17 (73.9)   | 6 (26.1)   |
| Perceived family economic status |            |            | 0.002       | 0.04       |
| Well-off/quite well-off          | 248 (55.7) | 197 (44.3) | 374 (84.0)  | 71 (16.0)  |
| Neither poor nor well-off        | 398 (47.0) | 448 (53.0) | 669 (71.1)  | 177 (20.9) |
| Poor                             | 26 (38.2)  | 42 (61.8)  | 50 (73.5)   | 18 (26.5)  |
| Perceived academic performance   |            |            | <0.001      | <0.001     |
| Very good                        | 44 (77.2)  | 13 (22.8)  | 52 (91.2)   | 5 (5.8)    |
| Good                             | 180 (59.0) | 123 (40.6) | 263 (86.8)  | 40 (13.2)  |
| Fairly good                      | 301 (50.5) | 295 (49.5) | 484 (81.2)  | 112 (18.8) |
| Fair                             | 138 (37.7) | 228 (62.3) | 275 (75.1)  | 91 (24.9)  |
| Poor                             | 9 (24.3)   | 28 (75.7)  | 19 (51.4)   | 18 (48.6)  |

252 Abbreviation: SD, standard deviation.

253 Values are numbers of subjects (%) for categorical variables and means  $\pm$  standard deviation (SD) for  
254 continuous variables.

255 \* Defined by a Center for Epidemiology Studies Depression Scale (CES-D) score of  $\geq 16$ .

256 † Defined by a CES-D score of  $\geq 23$ .

257 ‡ Chi-square test was used for categorical variables; independent Student's t-test was used for continuous  
258 variables.

259

260 **Health risk behaviors**

261 As shown in Table 2, a significantly higher proportion of students with depressive symptoms  
 262 reported consuming unhealthy food frequently, such as high-fat snack ( $p=0.001$  for depressive  
 263 symptoms;  $p<0.001$  for severe depressive symptoms), margarine, butter, or meat fat ( $p=0.02$   
 264 for depressive symptoms;  $p<0.001$  for severe depressive symptoms). A significantly lower  
 265 proportion of students with depressive symptoms reported consuming of healthy food  
 266 frequently, such as fruits and vegetables ( $p=0.009$  for depressive symptoms;  $p=0.007$  for severe  
 267 depressive symptoms), or lean protein ( $p<0.001$  for depressive symptoms;  $p=0.03$  for severe  
 268 depressive symptoms). A significantly higher proportion of students with depressive symptoms  
 269 reported not having desert over the past week ( $p=0.003$  for depressive symptoms;  $p=0.008$  for  
 270 severe depressive symptoms). Moreover, a significantly higher proportion of students with  
 271 depressive symptoms perceived that their body size was very overweight or very underweight  
 272 ( $p<0.001$  for both depressive symptoms and severe depressive symptoms).

273

274 **Table 2** Comparisons of health risk behaviors among university students with and without depressive  
 275 symptoms

| Health and health risk behaviors       | Depressive symptoms <sup>*</sup> |            |                      | Severe depressive symptoms <sup>†</sup> |            |                      |
|----------------------------------------|----------------------------------|------------|----------------------|-----------------------------------------|------------|----------------------|
|                                        | No                               | Yes        | P-value <sup>‡</sup> | No                                      | Yes        | P-value <sup>‡</sup> |
| Current tobacco smokers                | 5 (33.3)                         | 10 (66.7)  |                      | 12 (80.0)                               | 3 (20.0)   | 0.97                 |
| Self-perception regarding alcohol use  |                                  |            | 0.25                 |                                         |            | 0.004                |
| Non drinker                            | 425 (50.7)                       | 413 (49.3) |                      | 681 (81.3)                              | 157 (18.7) |                      |
| Occasional drinker                     | 247 (47.4)                       | 271 (52.6) |                      | 412 (78.7)                              | 106 (21.3) |                      |
| Regular drinker                        | 0 (0.0)                          | 3 (100)    |                      | 0 (0.0)                                 | 3 (100)    |                      |
| Current illicit drug users             | 0 (0.0)                          | 4 (100)    | 0.05                 | 1 (25.0)                                | 3 (75.0)   | 0.03                 |
| Condom use at last sex                 | 39 (47.0)                        | 44 (53.0)  | 0.95                 | 73 (88.0)                               | 10 (12.0)  | 0.08                 |
| Diagnosed with an STI                  | 4 (40.0)                         | 6 (60.0)   | 0.75                 | 110 (84.0)                              | 21 (16.0)  | 0.67                 |
| Thought of ending life                 | 40 (24.8)                        | 121 (75.2) | <0.001               | 84 (52.2)                               | 77 (47.8)  | <0.001               |
| Attempted to end life                  | 5 (20.0)                         | 20 (80.0)  | 0.63                 | 11 (44.0)                               | 14 (56.0)  | 0.47                 |
| Frequency of eating fast food per week |                                  |            | 0.49                 |                                         |            | 0.24                 |



|                                                 |            |            |            |            |
|-------------------------------------------------|------------|------------|------------|------------|
| 0 time                                          | 410 (49.3) | 421 (50.7) | 679 (81.7) | 152 (18.3) |
| 1-2 times                                       | 231 (50.7) | 225 (49.3) | 360 (78.9) | 96 (21.1)  |
| 3 times or more                                 | 31 (43.1)  | 41 (56.9)  | 54 (75.0)  | 18 (25.0)  |
| Frequency of daily soft drink consumption       |            |            | 0.31       | 0.01       |
| 0 time                                          | 105 (46.5) | 121 (53.5) | 178 (78.8) | 48 (21.2)  |
| 1-2 times                                       | 399 (51.2) | 380 (48.8) | 647 (83.1) | 132 (16.9) |
| 3 times or more                                 | 168 (47.5) | 186 (52.5) | 268 (75.7) | 86 (24.3)  |
| Frequency of weekly high-fat snack consumption  |            |            | 0.001      | <0.001     |
| 0 time                                          | 162 (52.8) | 145 (47.2) | 260 (84.7) | 47 (15.3)  |
| 1-2 times                                       | 443 (51.0) | 426 (49.0) | 711 (81.8) | 158 (18.2) |
| 3 times or more                                 | 67 (36.6)  | 116 (63.4) | 122 (66.7) | 61 (33.3)  |
| Frequency of weekly desert consumption          |            |            | 0.003      | 0.008      |
| 0 time                                          | 106 (40.6) | 155 (59.4) | 192 (73.6) | 69 (26.4)  |
| 1-2 times                                       | 434 (52.7) | 389 (47.3) | 676 (82.1) | 147 (17.9) |
| 3 times or more                                 | 132 (48.0) | 143 (52.0) | 225 (81.8) | 50 (18.2)  |
| Frequency of weekly fruit/vegetable consumption |            |            | 0.009      | 0.007      |
| 0 time                                          | 50 (37.3)  | 84 (62.7)  | 94 (70.1)  | 40 (29.9)  |
| 1-2 times                                       | 390 (51.7) | 365 (48.3) | 617 (81.7) | 138 (18.3) |
| 3 times or more                                 | 232 (49.4) | 238 (50.6) | 382 (81.3) | 88 (12.7)  |
| Frequency of weekly lean protein consumption    |            |            | <0.001     | 0.03       |
| 0 time                                          | 57 (34.8)  | 107 (65.2) | 119 (72.6) | 45 (27.4)  |
| 1-2 times                                       | 453 (51.8) | 421 (48.2) | 714 (81.7) | 160 (18.3) |
| 3 times or more                                 | 162 (50.5) | 159 (49.5) | 260 (81.0) | 61 (19.0)  |
| Amount of margarine/butter/meat fat consumption |            |            | 0.02       | <0.001     |
| None/very little                                | 296 (52.4) | 269 (47.6) | 471 (83.4) | 94 (16.6)  |
| Some                                            | 339 (48.7) | 357 (51.3) | 558 (80.2) | 138 (19.8) |
| A lot                                           | 37 (37.8)  | 61 (62.2)  | 64 (65.3)  | 34 (34.7)  |
| Self-perception about body size                 |            |            | <0.001     | <0.001     |
| About right                                     | 275 (55.4) | 221 (44.6) | 428 (86.3) | 68 (13.7)  |
| Very overweight                                 | 27 (34.2)  | 52 (65.8)  | 55 (69.6)  | 24 (30.4)  |
| Slightly overweight                             | 161 (48.9) | 168 (51.1) | 247 (75.1) | 82 (24.9)  |
| Slightly underweight                            | 191 (49.6) | 194 (50.4) | 319 (82.9) | 66 (17.1)  |

|                  |           |           |           |           |
|------------------|-----------|-----------|-----------|-----------|
| Very underweight | 18 (25.7) | 52 (74.3) | 44 (62.9) | 26 (37.1) |
|------------------|-----------|-----------|-----------|-----------|

276 *Abbreviations: STI, sexually transmitted infections.*

277 *Values are numbers of subjects (%).*

278 *\*Defined by a Center for Epidemiology Studies Depression Scale (CES-D) score of  $\geq 16$ .*

279 *†Defined by a CES-D score of  $\geq 23$ .*

280 *‡Chi-square test was used or Fisher's exact test was used as appropriate.*

281

## 282 Self-rated health (SF-12)

283 Table 3 shows that significantly higher proportion of students with depressive symptoms  
 284 perceived that their general health status was poor ( $p < 0.001$  for both depressive symptoms and  
 285 severe depressive symptoms). A significantly higher proportion of students with depressive  
 286 symptoms reported higher levels of limitation in several daily activities, such as limitation in  
 287 moderate activities ( $p < 0.001$  for depressive symptoms;  $p = 0.02$  for severe depressive  
 288 symptoms), climbing several flights of stairs ( $p < 0.001$  for depressive symptoms), or other kinds  
 289 of activities in the past four weeks as a result of their physical or emotional health problems  
 290 ( $p < 0.001$  for both depressive symptoms and severe depressive symptoms). Further, they  
 291 reported higher levels of problems in several other physical and emotional health aspects in the  
 292 past four weeks, such as the feeling that they had accomplished less than they would like  
 293 ( $p < 0.001$  for both depressive symptoms and severe depressive symptoms), pain interferes with  
 294 their normal work ( $p < 0.001$  for both depressive symptoms and severe depressive symptoms),  
 295 having less energy ( $p < 0.001$  for both depressive symptoms and severe depressive symptoms),  
 296 down-hearted and blue ( $p < 0.001$  for both depressive symptoms and severe depressive  
 297 symptoms), and that their physical health interferes with their social acts ( $p < 0.001$  for both  
 298 depressive symptoms and severe depressive symptoms).

299

300 **Table 3** Comparisons of self-rated health (SF-12) among university students with and without depressive  
 301 symptoms

| Self-rated health (SF-12)                | Depressive symptoms* |            |          | Severe depressive symptoms† |           |          |
|------------------------------------------|----------------------|------------|----------|-----------------------------|-----------|----------|
|                                          | No                   | Yes        | P-value‡ | No                          | Yes       | P-value‡ |
| Self-perception on general health status |                      |            | <0.001   |                             |           | <0.001   |
| Very good                                | 106 (64.2)           | 59 (35.8)  |          | 147 (89.1)                  | 18 (10.9) |          |
| Good                                     | 380 (58.5)           | 270 (41.5) |          | 566 (87.1)                  | 84 (12.9) |          |

|                                                                                       |            |            |        |            |            |        |
|---------------------------------------------------------------------------------------|------------|------------|--------|------------|------------|--------|
| Neither good nor poor                                                                 | 176 (38.0) | 287 (62.0) |        | 351 (75.8) | 112 (24.2) |        |
| Poor                                                                                  | 10 (12.3)  | 71 (87.7)  |        | 29 (35.8)  | 52 (64.2)  |        |
| Limitation in moderate activities on a typical day                                    |            |            | <0.001 |            |            | 0.02   |
| Greatly limited                                                                       | 20 (28.2)  | 51 (71.8)  |        | 50 (70.4)  | 21 (29.6)  |        |
| Mildly limited                                                                        | 291 (45.6) | 347 (54.4) |        | 505 (79.2) | 133 (20.8) |        |
| Not limited                                                                           | 361 (55.5) | 289 (44.5) |        | 538 (82.8) | 112 (17.2) |        |
| Limitation in climbing several flights of stairs                                      |            |            | <0.001 |            |            | 0.24   |
| Greatly limited                                                                       | 64 (35.8)  | 115 (64.2) |        | 140 (78.2) | 39 (21.8)  |        |
| Mildly limited                                                                        | 323 (47.8) | 353 (52.2) |        | 536 (79.3) | 140 (20.7) |        |
| Not limited                                                                           | 285 (56.5) | 219 (43.5) |        | 417 (82.7) | 87 (17.2)  |        |
| Limitation in other kinds of activities in past 4 weeks                               | 271 (37.8) | 446 (62.2) | <0.001 | 516 (72.0) | 201 (28.0) | <0.001 |
| Accomplished less than you would like in past 4 weeks as a result of emotional health | 377 (61.9) | 232 (38.1) | <0.001 | 553 (50.6) | 197 (26.3) | <0.001 |
| Accomplished less than you would like in past 4 weeks as a result of physical health  | 304 (67.3) | 148 (32.7) | <0.001 | 675 (74.4) | 232 (25.6) | <0.001 |
| Did activities less carefully than usual in past 4 weeks                              | 378 (41.8) | 526 (58.2) | <0.001 | 677 (74.9) | 227 (25.1) | <0.001 |
| Pain interferes with your normal work in past 4 weeks                                 |            |            | <0.001 |            |            | <0.001 |
| Not at all                                                                            | 141 (75.8) | 45 (24.2)  |        | 176 (94.6) | 10 (5.4)   |        |
| A little bit                                                                          | 401 (57.6) | 295 (42.4) |        | 635 (91.2) | 61 (8.8)   |        |
| Moderately                                                                            | 106 (32.9) | 216 (31.4) |        | 216 (67.1) | 106 (32.9) |        |
| Quite a bit                                                                           | 23 (16.5)  | 116 (83.5) |        | 62 (44.6)  | 77 (55.4)  |        |
| Extremely                                                                             | 1 (6.3)    | 15 (93.8)  |        | 4 (25.0)   | 12 (75.0)  |        |
| Feeling calm and peaceful in past 4 weeks                                             |            |            | 0.33   |            |            | 0.06   |
| A lot of the time                                                                     | 22 (42.3)  | 30 (57.7)  |        | 38 (73.1)  | 14 (26.9)  |        |
| Most of the time                                                                      | 68 (53.5)  | 59 (46.5)  |        | 92 (72.9)  | 35 (27.6)  |        |
| A good bit of time                                                                    | 115 (50.9) | 111 (49.1) |        | 188 (83.2) | 38 (16.2)  |        |

|                                                       |            |            |            |            |
|-------------------------------------------------------|------------|------------|------------|------------|
| Some of the time                                      | 278 (46.8) | 316 (53.2) | 477 (80.3) | 117 (17.7) |
| A little of the time                                  | 170 (51.8) | 158 (48.2) | 274 (83.5) | 54 (16.5)  |
| None of the time                                      | 19 (59.4)  | 13 (40.6)  | 24 (75.0)  | 8 (25.0)   |
| Having a lot of energy in past 4 weeks                |            |            | <0.001     | <0.001     |
| A lot of the time                                     | 46 (61.3)  | 29 (38.7)  | 66 (88.0)  | 9 (12.0)   |
| Most of the time                                      | 111 (68.9) | 50 (31.1)  | 149 (92.5) | 12 (7.5)   |
| A good bit of time                                    | 245 (56.8) | 186 (43.2) | 383 (88.9) | 48 (11.1)  |
| Some of the time                                      | 207 (41.5) | 292 (58.5) | 364 (72.9) | 135 (27.1) |
| A little of the time                                  | 57 (33.7)  | 112 (66.3) | 116 (68.6) | 53 (31.4)  |
| None of the time                                      | 6 (25.0)   | 18 (75.0)  | 15 (62.5)  | 9 (37.5)   |
| Feeling down-hearted and blue in past 4 weeks         |            |            | <0.001     | <0.001     |
| A lot of the time                                     | 7 (21.9)   | 25 (78.1)  | 14 (43.8)  | 18 (56.3)  |
| Most of the time                                      | 8 (8.3)    | 88 (91.7)  | 36 (37.5)  | 60 (62.5)  |
| A good bit of the time                                | 42 (17.9)  | 171 (80.3) | 117 (54.9) | 96 (45.1)  |
| Some of the time                                      | 222 (46.7) | 253 (53.3) | 412 (86.7) | 63 (13.3)  |
| A little of the time                                  | 354 (71.5) | 141 (28.5) | 469 (94.7) | 26 (5.3)   |
| None of the time                                      | 39 (81.3)  | 9 (18.8)   | 45 (93.8)  | 3 (6.3)    |
| Physical health interferes social act in past 4 weeks |            |            | <0.001     | <0.001     |
| A lot of the time                                     | 4 (33.3)   | 8 (66.7)   | 6 (50.0)   | 6 (50.0)   |
| Most of the time                                      | 10 (23.3)  | 33 (76.7)  | 18 (41.9)  | 58 (58.1)  |
| Some of the time                                      | 146 (38.1) | 237 (61.9) | 275 (71.8) | 108 (28.2) |
| A little of the time                                  | 355 (53.7) | 306 (46.3) | 568 (85.9) | 93 (14.1)  |
| None of the time                                      | 157 (60.4) | 103 (39.6) | 226 (26.9) | 34 (13.2)  |

302 *Values are numbers of subjects (%) for categorical variables.*

303 *\*Defined by a Center for Epidemiology Studies Depression Scale (CES-D) score of  $\geq 16$ .*

304 *†Defined by a CES-D score of  $\geq 23$ .*

305 *‡Chi-square test was used for categorical variables or Fisher's exact test was used as appropriate.*

306

### 307 **Adverse childhood experiences (ACEs)**

308 Table 4 shows that a significantly higher proportion of students with depressive symptoms  
 309 reported having been hit, slapped, or kicked by a parent or guardian ( $p < 0.001$  for both  
 310 depressive symptoms and severe depressive symptoms); that people in their family had said  
 311 hurtful or insulting things to them ( $p < 0.001$  for both depressive symptoms and severe

depressive symptoms); and that someone had tried to touch them or make them touch him/her in a sexual way ( $p=0.001$  for depressive symptoms;  $p<0.001$  for severe depressive symptoms). In contrast, significantly lower proportion of students with depressive symptoms reported that there had been someone to take care of them and take them to medical care when they got sick ( $p=0.04$  for depressive symptoms;  $p=0.03$  for severe depressive symptoms), and someone who helped them feel that they were loved and important ( $p=0.03$  for depressive symptoms;  $p<0.001$  for severe depressive symptoms).

**Table 4** Comparisons of adverse childhood experiences among university students with and without depressive symptoms

| Adverse childhood experiences                                                      | Depressive symptoms* |            |                      | Severe depressive symptoms <sup>†</sup> |            |                      |
|------------------------------------------------------------------------------------|----------------------|------------|----------------------|-----------------------------------------|------------|----------------------|
|                                                                                    | No                   | Yes        | P-value <sup>‡</sup> | No                                      | Yes        | P-value <sup>‡</sup> |
| Had been hit, slapped, kicked, by a parent/guardian                                | 200 (38.2)           | 323 (61.8) | <0.001               | 384 (73.4)                              | 139 (26.6) | <0.001               |
| People in my family had said hurtful or insulting things to me                     | 297 (39.0)           | 464 (61.0) | <0.001               | 558 (73.3)                              | 203 (26.7) | <0.001               |
| Someone had tried to touch me or make me touch them in a sexual way                | 87 (39.2)            | 135 (60.8) | 0.001                | 159 (71.6)                              | 63 (28.4)  | <0.001               |
| There had been someone to take care me and take me to medical care when I got sick | 636 (50.2)           | 632 (49.8) | 0.04                 | 1028 (81.1)                             | 240 (18.9) | 0.03                 |
| There had been someone who helped me feel that I was loved and important           | 647 (50.1)           | 644 (49.9) | 0.03                 | 1050 (81.3)                             | 266 (19.6) | <0.001               |

Values are numbers of subjects (%).

\*Defined by a Center for Epidemiology Studies Depression Scale (CES-D) score of  $\geq 16$ .

<sup>†</sup>Defined by a CES-D score of  $\geq 23$ .

<sup>‡</sup>Chi-square test was used.

326

**327 Risk factors of depressive symptoms**

328 Results of multivariate logistic analyses are shown in Table 5. After controlling for potential  
329 confounding factors, the odds of depressive symptoms increased significantly with self-  
330 reported poor academic performance (depressive symptoms: AOR=7.31, 95% CI=2.24-23.86;  
331 severe depressive symptoms: AOR=7.38, 95% CI=1.75-10.94) and high consumption of  
332 unhealthy food, including high-fat snack, margarine, butter, or meat fat (depressive symptoms:  
333 AOR=1.72, 95% CI=1.08-2.76; severe depressive symptoms: AOR=2.13, 95% CI=1.15-3.95). The  
334 odds decreased significantly with the perception that their body size was slightly underweight  
335 compared to the perception that their body size was very overweight (depressive symptoms:  
336 AOR=0.54, 95% CI=0.29-0.99; severe depressive symptoms: AOR=0.37, 95% CI=0.18-0.77).

337 Regarding self-rated health, the odds of depressive symptoms increased significantly  
338 with the perception that their general health status was poor (depressive symptoms: AOR=2.99,  
339 95% CI=1.28-7.00; severe depressive symptoms: AOR=5.43, 95% CI=2.19-13.46) and the report  
340 of higher level of limitation in moderate activities (depressive symptoms: AOR=0.30 (95%  
341 CI=0.16-0.58), higher level of pain interference with their normal work (depressive symptoms:  
342 AOR=10.43, 95% CI=1.05-10.94; severe depressive symptoms: AOR=10.02, 95% CI=1.99-9.28),  
343 and higher level of feeling down-hearted and blue (depressive symptoms: AOR=6.69, 95%  
344 CI=1.87-23.90; severe depressive symptoms: AOR=8.72, 95% CI=1.69-14.86).

345 For ACEs, the odds of depressive symptoms increased significantly with the report of  
346 having been hit, slapped, or kicked by a parent or guardian (depressive symptoms: AOR=1.39,  
347 95% CI=1.04-1.86) and that people in their family had said hurtful or insulting things to them  
348 (depressive symptoms: AOR=1.82, 95% CI=1.37-2.42; severe depressive symptoms: AOR=2.18,  
349 95% CI=1.46-3.24) during their childhood. In contrast, the odds of depressive symptoms  
350 decreased significantly with the report that there had been someone to take care of them and  
351 take them to medical care when they got sick (depressive symptoms: AOR=0.51, 95% CI=0.30-  
352 0.86; severe depressive symptoms: AOR=0.26, 95% CI=0.13-0.52).

353

**354 Table 5** Factors associated with depressive symptoms and severe depressive symptoms

| Variables in the final model                       | Depressive symptoms <sup>†</sup> |         | Severe depressive symptoms <sup>‡</sup> |         |
|----------------------------------------------------|----------------------------------|---------|-----------------------------------------|---------|
|                                                    | AOR (95% CI)                     | P-value | AOR (95% CI)                            | P-value |
| Perceived academic performance                     |                                  |         |                                         |         |
| Very good                                          | Reference                        |         | Reference                               |         |
| Good                                               | 2.28 (1.01-5.15)                 | 0.04    | 1.22 (0.35-4.19)                        | 0.76    |
| Fairly good                                        | 3.51 (1.58-7.78)                 | 0.002   | 2.15 (0.65-7.11)                        | 0.21    |
| Fair                                               | 5.30 (2.35-11.93)                | <0.001  | 2.52 (0.75-8.43)                        | 0.13    |
| Poor                                               | 7.31 (2.24-23.86)                | 0.001   | 7.38 (1.75-10.94)                       | 0.006   |
| Frequency of weekly high-fat snack consumption     |                                  |         |                                         |         |
| 0 time                                             | Reference                        |         | Reference                               |         |
| 1-2 times                                          | 0.99 (0.72-1.37)                 | 0.95    | 1.25 (0.78-1.99)                        | 0.36    |
| 3 times or more                                    | 1.72 (1.08-2.76)                 | 0.02    | 2.13 (1.15-3.95)                        | 0.02    |
| Frequency of weekly lean protein consumption       |                                  |         |                                         |         |
| 0 time                                             | Reference                        |         | Reference                               |         |
| 1-2 times                                          | 0.52 (0.34-0.79)                 | 0.002   | 0.69 (0.41-1.18)                        | 0.17    |
| 3 times or more                                    | 0.62 (0.38-0.96)                 | 0.04    | 0.80 (0.44-1.47)                        | 0.48    |
| Amount of margarine/butter/meat fat consumption    |                                  |         |                                         |         |
| None/very little                                   |                                  |         | Reference                               |         |
| Some                                               |                                  |         | 0.98 (0.66-1.46)                        | 0.91    |
| A lot                                              |                                  |         | 1.92 (1.02-3.64)                        | 0.04    |
| Self-perception about body shape                   |                                  |         |                                         |         |
| Very overweight                                    | Reference                        |         |                                         |         |
| Slightly overweight                                | 0.56 (0.31-1.07)                 | 0.08    | 0.65 (0.32-1.14)                        | 0.25    |
| About right                                        | 0.58 (0.32-1.05)                 | 0.07    | 0.45 (0.22-0.93)                        | 0.03    |
| Slightly underweight                               | 0.54 (0.29-0.99)                 | 0.04    | 0.37 (0.18-0.77)                        | 0.008   |
| Very underweight                                   | 0.92 (0.38-2.25)                 | 0.86    | 0.38 (0.14-0.99)                        | 0.04    |
| Self-perception on general health status           |                                  |         |                                         |         |
| Very good                                          |                                  |         |                                         |         |
| Good                                               | 1.05 (0.68-1.64)                 | 0.82    | 1.19 (0.60-2.38)                        | 0.62    |
| Fair                                               | 1.58 (0.99-2.51)                 | 0.05    | 1.47 (0.73-2.96)                        | 0.28    |
| Poor                                               | 2.99 (1.28-7.00)                 | 0.01    | 5.43 (2.19-13.46)                       | <0.001  |
| Limitation in moderate activities on a typical day |                                  |         |                                         |         |

|    |                                                                                       |                    |        |                   |        |
|----|---------------------------------------------------------------------------------------|--------------------|--------|-------------------|--------|
| 1  |                                                                                       |                    |        |                   |        |
| 2  |                                                                                       |                    |        |                   |        |
| 3  | Greatly limited                                                                       | Reference          |        | Reference         |        |
| 4  |                                                                                       |                    |        |                   |        |
| 5  | Mildly limited                                                                        | 0.39 (0.20-0.74)   | 0.004  | 0.64 (0.29-1.34)  | 0.23   |
| 6  |                                                                                       |                    |        |                   |        |
| 7  | Not limited                                                                           | 0.30 (0.16-0.58)   | <0.001 | 0.63 (0.30-1.36)  | 0.24   |
| 8  | Pain interferes with your normal work in past 4 weeks                                 |                    |        |                   |        |
| 9  |                                                                                       |                    |        |                   |        |
| 10 | Not at all                                                                            | Reference          |        | Reference         |        |
| 11 |                                                                                       |                    |        |                   |        |
| 12 | A little bit                                                                          | 1.68 (1.08-2.61)   | 0.02   | 1.01 (0.46-2.22)  | 0.99   |
| 13 |                                                                                       |                    |        |                   |        |
| 14 | Moderately                                                                            | 3.10 (1.89-5.10)   | <0.001 | 3.69 (1.68-7.11)  | 0.001  |
| 15 |                                                                                       |                    |        |                   |        |
| 16 | Quite a bit                                                                           | 4.14 (2.13-8.05)   | <0.001 | 4.68 (2.01-10.92) | <0.001 |
| 17 |                                                                                       |                    |        |                   |        |
| 18 | Extremely                                                                             | 10.43 (1.05-10.94) | 0.04   | 10.02 (1.99-9.28) | 0.005  |
| 19 | Feeling down-hearted and blue in past 4 weeks                                         |                    |        |                   |        |
| 20 |                                                                                       |                    |        |                   |        |
| 21 | None of the time                                                                      | Reference          |        | Reference         |        |
| 22 |                                                                                       |                    |        |                   |        |
| 23 | A little of the time                                                                  | 0.52 (0.63-3.66)   | 0.35   | 1.02 (0.24-4.29)  | 0.98   |
| 24 |                                                                                       |                    |        |                   |        |
| 25 | Some of the time                                                                      | 3.42 (1.42-8.23)   | 0.006  | 1.83 (0.45-7.45)  | 0.40   |
| 26 |                                                                                       |                    |        |                   |        |
| 27 | A good bit of the time                                                                | 7.70 (3.02-19.66)  | <0.001 | 6.01 (1.45-4.85)  | 0.01   |
| 28 |                                                                                       |                    |        |                   |        |
| 29 | Most of the time                                                                      | 20.71 (6.47-66.37) | <0.001 | 9.04 (2.31-13.71) | 0.002  |
| 30 |                                                                                       |                    |        |                   |        |
| 31 | A lot of the time                                                                     | 6.69 (1.87-23.90)  | 0.003  | 8.72 (1.69-14.86) | 0.01   |
| 32 | Had been hit, slapped, kicked, by a parent/guardian                                   |                    |        |                   |        |
| 33 |                                                                                       |                    |        |                   |        |
| 34 | No                                                                                    | Reference          |        | Reference         |        |
| 35 |                                                                                       |                    |        |                   |        |
| 36 | Yes                                                                                   | 1.39 (1.04-1.86)   | 0.03   | 1.11 (0.75-1.65)  | 0.59   |
| 37 | People in my family had said hurtful or insulting things to me                        |                    |        |                   |        |
| 38 |                                                                                       |                    |        |                   |        |
| 39 | No                                                                                    | Reference          |        | Reference         |        |
| 40 |                                                                                       |                    |        |                   |        |
| 41 | Yes                                                                                   | 1.82 (1.37-2.42)   | <0.001 | 2.18 (1.46-3.24)  | <0.001 |
| 42 | There had been someone to take care of me and take me to medical care when I got sick |                    |        |                   |        |
| 43 |                                                                                       |                    |        |                   |        |
| 44 | No                                                                                    | Reference          |        | Reference         |        |
| 45 |                                                                                       |                    |        |                   |        |
| 46 | Yes                                                                                   | 0.51 (0.30-0.86)   | 0.01   | 0.26 (0.13-0.52)  | <0.001 |

355 Abbreviations: AOR, adjusted odds ratio; CI, confidence interval.

356 \*Variables in the table were the ones that remained statistically significant in the final multivariate  
357 logistic regression model after several steps of model fitting.

358 † Defined by a Center for Epidemiology Studies Depression Scale (CES-D) score of  $\geq 16$ .

359 ‡ Defined by a CES-D score of  $\geq 23$ .

360

## 361 DISCUSSION



1  
2  
3 362 This study unearthed a number of factors correlated with depressive symptoms among  
4  
5 363 university students in Cambodia. The salient factors comprised cultural and socio-economic  
6  
7 364 dimensions (gender, socio-economic background, and lack of general and medical care by  
8  
9 365 family during their childhood), individual behaviors and attitudes (poor academic  
10  
11 366 accomplishment, consumption of unhealthy food, negative perception about their body and  
12  
13 367 their general health status, and limited physical activeness), and nurture-related facets  
14  
15 368 (physical violence and psychological abuse by family during their childhood).

16 369 The bivariate outcomes display that students from the provincial university (UB) and a  
17  
18 370 poorer family were more susceptible to depressive symptoms. Likewise, students from a poorer  
19  
20 371 family and female students were more prone to severe depressive symptoms. Albeit not  
21  
22 372 manifesting in the multivariate model, these factors are corroborated by the existing  
23  
24 373 scholarship. Various studies revealed that university students from rural areas and low socio-  
25  
26 374 economic backgrounds were predisposed to higher depression.<sup>1 16 28 55 56</sup> This could be  
27  
28 375 explained by an economic situation where students with a rural background tended to stipulate  
29  
30 376 a poorer family status. Plus, financial vulnerability could further exacerbate depression in  
31  
32 377 students from low-income families. A meta-analysis of 60 studies unveiled that people in the  
33  
34 378 lowest socio-economic quintile had 1.81 the probability of depression compared with those in  
35  
36 379 the highest socio-economic quintile.<sup>57</sup> A global study on 17,348 university students from 23  
37  
38 380 high-, middle-, and low-income countries also uncovered that higher depressive symptoms  
39  
40 381 were recorded among students in low-income countries and economies with greater income  
41  
42 382 inequality.<sup>16</sup> The Cambodian economy has been growing rapidly in terms of income per capita;  
43  
44 383 yet, income gaps between the rich and the poor and between rural and urban areas remain  
45  
46 384 large.<sup>58</sup> The gaps in income and material growth, which typify economic conditions, may induce  
47  
48 385 people's mental health problems. In another word, poor economic status may bring about low  
49  
50 386 self-esteem and self-confidence, which would lead to depression.

51 387 Some research also discovered that female students were more at risk to depression.<sup>16</sup>  
52  
53 388 <sup>59-62</sup> This might be due to social difficulties, physiological tenets, higher self-expectations, and  
54  
55 389 perceived lack of competence among female students.<sup>59</sup> In the Cambodian culture, young  
56  
57 390 women would perceive a great deal of challenges when living away from their family or parents

1  
2  
3 391 since they need to maintain the cultural behaviors and meanwhile cope with independent  
4  
5 392 habitation. Over half (56.6%) of the student respondents in our study were not living with their  
6  
7 393 parents. Moreover, women tended to over-report medical and psychological symptoms as  
8  
9 394 indicated in a study on 440 undergraduate students in America.<sup>63</sup> Articulating their emotions  
10  
11 395 may be one strategy for dealing with stressful events.

12 396 Our multivariate results depict that students with depressive symptoms, regardless of  
13  
14 397 severity, tended to report poor academic performance and higher consumption of unhealthy  
15  
16 398 food. These findings conform to a systematic review of 24 studies<sup>6</sup> and studies in Asia, such as  
17  
18 399 China,<sup>7</sup> which pinpoint low scholastic merit and suicidal ideation as consistent correlates of  
19  
20 400 depression in university students probably as a culmination of poor concentration and solitude.  
21  
22 401 On the consumption of unhealthy food, the transition from adolescence to adulthood, and thus  
23  
24 402 the changes in lifestyle such as living arrangements and independence, might have rendered  
25  
26 403 university students to indulge in unhealthy food, as pinpointed by a meta-analysis of 39 studies  
27  
28 404 in China.<sup>7</sup> As afore-mentioned, more than half of our sample were not living with their parents;  
29  
30 405 therefore, it might have been hard for them to maintain healthy daily food. Conversely,  
31  
32 406 depression might have made students care-free about themselves and consequently eat  
33  
34 407 unhealthily.<sup>17</sup> This implies that nutrition education for both physical and mental health,  
35  
36 408 stressing healthy food for the body and mind, is imperative for university students.

37 409 Students with depressive symptoms, regardless of magnitude, also tended to have a  
38  
39 410 negative perception about their body and their general health status. These findings confirms  
40  
41 411 the general perception among depressed people who are not gratified with their body and  
42  
43 412 health,<sup>17</sup> although these relationships require a cautious interpretation given that CES-D also  
44  
45 413 measures some aspects of negative self-perception. Further, depressed students were more  
46  
47 414 likely to have limited physical activeness, more pain interference with their normal work, and  
48  
49 415 more dismay or sorrow.<sup>64 65</sup> Therefore, physical exercises, such as sports, should be regularly  
50  
51 416 promoted among university students.

52 417 Finally, students with depressive symptoms, disregard of severity, were more likely to  
53  
54 418 encounter physical violence by their parent or guardian, psychological abuse by their family  
55  
56 419 members, and lack of general and medical care by their family when they were growing up. As

1  
2  
3 420 for the physical violence and psychological abuse, this finding tends to acquiesce with a study in  
4  
5 421 Cambodia that postulates that exposure to violence within family is associated with depression  
6  
7 422 in high school students.<sup>38 39</sup> On the lack of general and medical care by family, a Chinese study  
8  
9 423 on 5,245 students at six universities found that students who had a poor parental relationship  
10  
11 424 were more vulnerable to depression.<sup>66</sup> Also, a global study on 17,348 university students from  
12  
13 425 23 high, middle-, and low-income countries iterated that university students with less  
14  
15 426 individualistic cultures, particularly in Asia, reported higher extents of depressive symptoms.<sup>16</sup>  
16  
17 427 Students of these cultures longed for more familial and societal ties and assistance, and thus  
18  
19 428 felt depressed once this social capital was unavailable.<sup>16</sup> This highlights a significant role of  
20  
21 429 family bonds and scaffolding in association with depression among university students. The lack  
22  
23 430 of social support from the family presumably would only be a factor for students living  
24  
25 431 independently. But, for those living with relatives, friends, or spouse, they would still have such  
26  
27 432 support.

27 433 A study on a sample of 2,671 respondents in nine provinces and a capital city in 2012  
28  
29 434 revealed that Cambodia greatly needs more and better counseling and mental health services.<sup>67</sup>  
30  
31 435 The study also pointed out the shortage of skilled professionals in the field of mental health,  
32  
33 436 particularly those with high clinical and counseling skills to treat mental disorders. In 2012,  
34  
35 437 Cambodia had only 49 trained psychiatrists and 45 psychiatric nurses working in mental health  
36  
37 438 facilities and private practices.<sup>67 68</sup> Many health staff lack training, supervision, and experience  
38  
39 439 in these areas. Only about 300 doctors completed basic mental healthcare training.<sup>69</sup> At  
40  
41 440 university level, the 2012 study called for more awareness raising for self-care and burnout  
42  
43 441 prevention and mental health counseling services for staff and students.<sup>67</sup> Given the paucity of  
44  
45 442 mental health services in general, let alone at universities, our findings fuel the needs for more  
46  
47 443 and better mental healthcare in Cambodia. Further to medical care, universities should provide  
48  
49 444 measures, such as student loans and healthy canteens, to mitigate some key predictors of  
50  
51 445 depression among students, such as financial hardship and poor diets.

51 446 This study contains certain limitations. First, it examined students at only two public  
52  
53 447 universities, one in a city and the other in a province. Hence, its findings cannot be generalized  
54  
55 448 at a national level. Second, the cross-sectional design did not enable an establishment of the

1  
2  
3 449 causal linkages between depressive symptoms and the related factors. Given the temporal  
4  
5 450 order and the cross-sectional nature of the data, causal relationships between the variables  
6  
7 451 could not be derived. Potential bi-directionality of the associations could occur either way. For  
8  
9 452 instance, physical inactivity could cause depression. Nonetheless, the reverse could also be  
10  
11 453 true—that depression could lead to inactivity, and of course both could be true simultaneously,  
12  
13 454 where depressive symptoms worsen with physical inactivity, making physical activity less likely.  
14  
15 455 Third, this study employed self-reported data, which might have been subject to recall bias of  
16  
17 456 over-reporting and under-reporting. Future studies should attempt to use more objective data  
18  
19 457 (e.g., linking participants' responses to university records of academic performance) to increase  
20  
21 458 validity of the information. Nonetheless, the quality of the data was ensured by thorough  
22  
23 459 training of the enumerators and field supervisors on the study protocols and data collection  
24  
25 460 method. Finally, the main outcome measure (CES-D) and some other measures, such as ACEs  
26  
27 461 and SF-12, were modified from other research and have not been validated in the Cambodian  
28  
29 462 settings. Therefore, the interpretation of the findings must be made with caution.  
30  
31 463 Notwithstanding these malfeasances, the findings of this study offer first and foremost  
32  
33 464 implications for policy development and future research in the Cambodian context.  
34

465

## 466 **CONCLUSIONS**

36 467 This study identified social and behavioral factors associated with depressive symptoms among  
37  
38 468 Cambodian students at two universities. While causation could not be drawn between these  
39  
40 469 factors and depression, we surmise that these factors were inter-twined, and thus need to be  
41  
42 470 addressed in an integrated and holistic fashion.

43  
44 471 These findings render three major implications. First, given the current educational  
45  
46 472 reform and labor market that demand better quality and ergo more competition among  
47  
48 473 university students, the correlates of depressive symptoms could not be more critical for  
49  
50 474 tackling for the time being. Failure to ameliorate these factors would jeopardize the  
51  
52 475 qualification and career development of this populace and finally the human capital for nation-  
53  
54 476 building. Second, these findings warrant an acceleration of on-campus counseling services for  
55  
56 477 university students throughout the course of studentship. Efforts should be invested in

1  
2  
3 478 comprehensive screening and intervention programs to diagnose those susceptible students  
4  
5 479 early, offer immediate treatment, and cater appropriate support. Ultimately, the jurisdiction of  
6  
7 480 refining students' mental state should go beyond universities to families and pertinent  
8  
9 481 governmental bodies at large, provided we are to assist the young to overcome their academic  
10  
11 482 challenges and enjoy a prosperous post-graduation life. Further research could delve into  
12  
13 483 changing lifestyles and their associations with depressive symptoms among a larger sample of  
14  
15 484 university students. Furthermore, validation studies are required to develop and validate  
16  
17 485 reliable instruments for use in Cambodian populations.  
18  
19 486

20 487 **Acknowledgements** The authors thank research assistants; representatives of students, faculty  
21  
22 488 members, and school administrators who supported the development of the study design and  
23  
24 489 tools; and the study participants for their contribution to this study.  
25  
26 490

27 491 **Contributions** SY, KP and TS conceived research questions, designed the study and developed  
28  
29 492 the research protocol and tools. SY and CN analyzed the data and interpreted the results and  
30  
31 493 drafted the manuscript. KP, PC and RY supported the protocol and tools development and were  
32  
33 494 responsible for training and data collection. All authors contributed to the writing and approved  
34  
35 495 the final manuscript.  
36  
37 496

38 497 **Funding** Data used for this analysis were collected as part of a larger study funded by the  
39  
40 498 United States Agency for International Development (USAID). The funder had no role in study  
41  
42 499 design, data collection and analyses, decision to publish, or preparation of the manuscript.  
43  
44 500

45 501 **Disclaimer** Content of this paper is the responsibility of the authors and does not reflect the  
46  
47 502 view of USAID or our respective institutions  
48  
49 503

50  
51 504 **Competing interests** None declared  
52  
53 505

1  
2  
3 506 **Ethics approval** The National Ethics Committee for Health Research of the Ministry of Health,  
4 507 Cambodia approved this study (Reference no. 082NECHR), and a written informed consent was  
5 508 obtained from each participant.  
6  
7  
8

9 509  
10 510 **Data sharing statement** Data used for this analysis are available upon request from the  
11 511 Principal Investigator (Dr. Siyan Yi) at [siyan@doctor.com](mailto:siyan@doctor.com). The data cannot be made publicly  
12 512 available due to ethical restriction.  
13  
14  
15

16 513

## 17 514 REFERENCES

- 18  
19  
20 515 1. Bayram N, Bilgel N. The prevalence and socio-demographic correlations of depression,  
21 516 anxiety and stress among a group of university students. *Soc Psychiatry Psychiatr*  
22 517 *Epidemiol* 2008;43(8):667-672.  
23  
24 518 2. Stewart-Brown S, Evans J, Patterson J, et al. The health of students in institutes of higher  
25 519 education: an important and neglected public health problem? *J Public Health Med*  
26 520 2000;22(4):492-9.  
27  
28 521 3. Tomoda A, Mori K, Kimura M, et al. One-year prevalence and incidence of depression  
29 522 among first-year university students in Japan: a preliminary study. *Psychiatry Clin*  
30 523 *Neurosci* 2000;54(5):583-8.  
31  
32 524 4. Voelker R. Mounting student depression taxing campus mental health services. *JAMA*  
33 525 2003;289(16):2055-6.  
34  
35 526 5. Wong JG, Cheung EP, Chan KK, et al. Web-based survey of depression, anxiety and stress  
36 527 in first-year tertiary education students in Hong Kong. *Aust N Z J Psychiatry*  
37 528 2006;40(9):777-82.  
38  
39 529 6. Ibrahim AK, Kelly SJ, Adams CE, et al. A systematic review of studies of depression  
40 530 prevalence in university students. *J Psychiatr Res* 2013;47:391-400.  
41  
42 531 7. Lei XY, Xiao LM, Liu YN, et al. Prevalence of Depression among Chinese University  
43 532 Students: A Meta-Analysis. *PLoS One*. 2016;11(4):e0153454.  
44  
45 533 8. Goebert D, Thompson D, Takeshita J, et al. Depressive symptoms in medical students  
46 534 and residents: a multischool study. *Acad Med* 2009;84(2):236-41.  
47  
48  
49  
50  
51  
52  
53  
54  
55  
56  
57  
58  
59  
60

- 1  
2  
3 535 9. Vazquez F, Blanco V. Symptoms of depression and related factors among Spanish  
4  
5 536 university students. *Psychol Rep* 2006;99(2):583-90.  
6
- 7 537 10. Vazquez F, Blanco V. Prevalence of DSM-IV major depression among Spanish university  
8  
9 538 students. *J Am Coll Health* 2008;57(2):165-71.
- 10  
11 539 11. Chen L, Wang L, Qiu XH, et al. Depression among Chinese university students:  
12  
13 540 prevalence and socio-demographic correlates. *PLoS One*. 2013;8(3):e58379.
- 14  
15 541 12. Shamsuddin K, Fadzil F, Ismail WS, et al. Correlates of depression, anxiety and stress  
16  
17 542 among Malaysian university students. *Asian J Psychiatr* 2013;6(4):318-23.
- 18  
19 543 13. Bayati A, Beigi M, Salehi M. Depression prevalence and related factors in Iranian  
20  
21 544 students. *Pak J Biol Sci* 2009;12(20):1371-5.
- 22  
23 545 14. Garlow S, Rosenberg J, Moore J, et al. Depression, desperation, and suicidal ideation in  
24  
25 546 college students: results from the American Foundation for Suicide Prevention College  
26  
27 547 screening project at Emory University. *Depress Anxiety* 2008;25(6):482-8.
- 28  
29 548 15. Khan M, Mahmood S, Badshah A, et al. Prevalence of depression, anxiety and their  
30  
31 549 associated factors among medical students in Karachi, Pakistan. *J Pak Med Assoc* 2006  
32  
33 550 56(12):583-6.
- 34  
35 551 16. Steptoe A, Tsuda A, Tanaka Y. Depressive symptoms, socio-economic background, sense  
36  
37 552 of control, and cultural factors in university students from 23 countries. *Int J Behav Med*  
38  
39 553 2007;14:97-107.
- 40  
41 554 17. National Collaborating Centre for Mental Health (UK). *Depression: The Treatment and*  
42  
43 555 *Management of Depression in Adults (Updated Edition)*. Leicester (UK): British  
44  
45 556 Psychological Society; 2010.
- 46  
47 557 18. Hysenbegasi A, Hass S, Rowland C. The impact of depression on the academic  
48  
49 558 productivity of university students. *J Ment Health Policy Econ* 2005;8:145-51.
- 50  
51 559 19. Heiligenstein E, Guenther G, Hsu K, et al. Depression and academic impairment in  
52  
53 560 college students. *J Am Coll Health* 1996;45:59-64.
- 54  
55 561 20. Meilman PW, Manley C, Gaylor MS, et al. Medical withdrawals from college for mental  
56  
57 562 health reasons and their relation to academic performance. *J Am Coll Health*  
58  
59 563 1992;40:217-23.

- 1  
2  
3 564 21. Whitton S, Whisman M. Relationship satisfaction, instability and depression. *J Fam*  
4  
5 565 Psychol 2010;24:791-4.  
6  
7 566 22. Jeon H. Depression and suicide. *J Korean Med Ass* 2011;54:370-5.  
8  
9 567 23. Furr S, Westefeld J, McConnell G, et al. Suicide and depression among college students:  
10  
11 568 A decade later. *Profess Psychol* 2001;32(1):97-100.  
12  
13 569 24. Harvey S, Glozier N, Henderson M, et al. Depression and work performance: an  
14  
15 570 ecological study using web-based screening. *Occup Med* 2011;61:209-11.  
16  
17 571 25. Mushquash AR, Stewart SH, Sherry SB, et al. Depressive symptoms are a vulnerability  
18  
19 572 factor for heavy episodic drinking: A short-term, four-wave longitudinal study of  
20  
21 573 undergraduate women. *Addict Behav* 2013;38:2180-6.  
22  
23 574 26. Buckner JD, Keough ME, Schmidt NB. Problematic alcohol and cannabis use among  
24  
25 575 young adults: The roles of depression and discomfort and distress tolerance. *Addict*  
26  
27 576 *Behav* 2007;32:1957-63.  
28  
29 577 27. Adams TB, Wharton CM, Quilter L, et al. The association between mental health and  
30  
31 578 acute infectious illness among a national sample of 18-to 24-year-old college students. *J*  
32  
33 579 *Am Coll Health* 2008;56:657-64.  
34  
35 580 28. Bostanci M, Ozdel O, Oguzhanoglu NK, et al. Depressive symptomatology among  
36  
37 581 university students in Denizli, Turkey: Prevalence and sociodemographic correlates.  
38  
39 582 *Croat Med J* 2005;46:96-100.  
40  
41 583 29. Eller T, Aluoja A, Vasar V, et al. Symptoms of anxiety and depression in Estonian medical  
42  
43 584 students with sleep problems. *Depress Anxiety* 2006;23:250-6.  
44  
45 585 30. Denise L, Terrie M, Avshalom C, et al. Psychiatric disorder in a birth cohort of young  
46  
47 586 adults: Prevalence, comorbidity, clinical significance, and new case incidence from ages  
48  
49 587 11-21. *J Consult Clin Psychol* 1996;64:552-62.  
50  
51 588 31. Aalto-Setälä T, Marttunen M, Tuulio-Henriksson A, et al. One-month prevalence of  
52  
53 589 depression and other DSM-IV disorders among young adults. *Psychol Med* 2001;31:791-  
54  
55 590 801.  
56  
57  
58  
59  
60



- 1  
2  
3 591 32. Kessler RC, Berglund P, Demler O, et al. Lifetime prevalence and age-of-onset  
4 592 distributions of DSM-IV disorders in the National Comorbidity Survey Replication. Arch  
5 593 Gen Psychiatry 2005;62(6):593-602.  
6  
7 594 33. Kessler RC, Walters EE. Epidemiology of DSM-III-R major depression and minor  
8 595 depression among adolescents and young adults in the National Comorbidity Survey.  
9 596 Depress Anxiety 1998;7(1):3-14.  
10  
11 597 34. Vinas Poch F, Villar E, Caparros B, et al. Feelings of hopelessness in a Spanish university  
12 598 population: Descriptive analysis and its relationship to adapting to university, depressive  
13 599 symptomatology and suicidal ideation. Soc Psychiatry Psychiatr Epidemiol  
14 600 2004;39(4):326-34.  
15  
16 601 35. Kaplan G, Shema S, Leite C. Socioeconomic determinants of psychological wellbeing: The  
17 602 role of income, income change, and income sources during the course of 29 years. Ann  
18 603 Epidemiol 2008;18:531-7.  
19  
20 604 36. Weissman M, Bland R, Canino G, et al. Cross-national epidemiology of major depression  
21 605 and bipolar disorder. JAMA 1996;276:293-9.  
22  
23 606 37. Marsella A. Thoughts on cross-cultural studies on the epidemiology of depression. Cult  
24 607 Medicine Psychiatry 1978;2:343-57.  
25  
26 608 38. Yi S, Poudel KC, Yasuoka J, et al. Sibling care, school performance, and depression  
27 609 among adolescent caretakers in Cambodia. Asian J Psychiatr 2012;5(2):132-6.  
28  
29 610 39. Yi S, Poudel KC, Yasuoka J, et al. Exposure to violence in relation to depressive symptoms  
30 611 among male and female adolescent students in Cambodia. Soc Psychiatry Psychiatr  
31 612 Epidemiol 2013;48(3):397-405.  
32  
33 613 40. Nou L. Investigating stress symptomatology among Cambodian university students. Int  
34 614 Rev Mod Sociol 2013;39(1):133-64.  
35  
36 615 41. Kwok KW, Chan S, Heng C, Kim S, Neth B, Thon V. Scoping Study: Research Capacities of  
37 616 Cambodia's Universities. Phnom Penh: Development Research Forum in Cambodia;  
38 617 2010.  
39  
40 618 42. Radloff LS. The CES-D scale: A self-report depression scale for research in the general  
41 619 population. Appl Psychol Meas 1977;1:385-401.  
42  
43  
44  
45  
46  
47  
48  
49  
50  
51  
52  
53  
54  
55  
56  
57  
58  
59  
60

- 1  
2  
3 620 43. Shima S, Shikano T, Kitamura T, et al. New self-rated scale for depression (in Japanese).  
4  
5 621 Japanese J Clin Psychiatry 1985;27:717-23.  
6  
7 622 44. Wada K, Tanaka K, Theriault G, et al. Validity of the Center for Epidemiologic Studies  
8  
9 623 Depression Scale as a screening instrument of major depressive disorder among  
10  
11 624 Japanese workers. Am J Ind Med 2007;50:8-12.  
12  
13 625 45. National Institute of Statistics, Directorate General for Health, and ORC Macro.  
14  
15 626 Cambodia Demographic and Health Survey 2014. Phnom Penh: National Institute of  
16  
17 627 Statistics and ORC Macro; 2014.  
18  
19 628 46. Ministry of Education, Youth, and Sport. Examining life experiences and HIV risks of  
20  
21 629 young entertainment workers in four Cambodian cities. Phnom Penh: 46. Ministry of  
22  
23 630 Education, Youth, and Sport; 2012.  
24  
25 631 47. Yi S, Poudel KC, Yasuoka J, et al. Role of risk and protective factors in risky sexual  
26  
27 632 behavior among high school students in Cambodia. BMC Public Health 2010;10:477.  
28  
29 633 48. Yi S, Poudel KC, Yasuoka J, et al. Risk vs. protective factors for substance use among  
30  
31 634 adolescents in Cambodia. J Subst Use 2011;16(1):14-26.  
32  
33 635 49. Steptoe A, Wardle J. The European health and behaviour survey: The development of an  
34  
35 636 international study in health psychology. Psychol Health 1996;11:49-73.  
36  
37 637 50. Center for Disease Control (CDC). Youth Risk Behavior Surveillance: National College  
38  
39 638 Health Risk Behavior Survey – United States, 1995. MMWR 1997;46(SS-6):1-54.  
40  
41 639 51. Center for Disease Control (CDC)/World Health Organization (WHO). The Global School-  
42  
43 640 based Student Health Survey (GSHS). Atlanta, GA: CDC/WHO; 2012.  
44  
45 641 52. Bernstein DP, Stein JA, Newcomb MD, et al. Development and validation of a brief  
46  
47 642 screening version of the Childhood Trauma Questionnaire. Child Abuse Negl  
48  
49 643 2003;27(2):169-190.  
50  
51 644 53. Gandek BL, Ware JE, Aaronson NK, et al. Cross-validation of item selection and scoring  
52  
53 645 for the SF-12 Health Survey in nine countries: Results from the IQOLA Project.  
54  
55 646 International Quality of Life Assessment. J Clin Epidemiol 1998;51(11):1171-8.  
56  
57 647 54. Ware JE, Kosinski MA, Keller SD. SF-36 Physical and Mental Health Summary Scales: A  
58  
59 648 User Manual. Boston: Health Institute, New England Medical Center; 1994.  
60

- 1  
2  
3 649 55. Andrews B, Wilding JM. The relation of depression and anxiety to life-stress and  
4  
5 650 achievement in students. *Br J Psychol* 2004;95:509-21.  
6  
7 651 56. Eisenberg D, Gollust SE, Golberstein E, et al. Prevalence and correlates of depression,  
8  
9 652 anxiety, and suicidality among university students. *Am J Orthopsychiatry*  
10  
11 653 2007;77(4):534-2.  
12  
13 654 57. Lorant V, Deliege D, Eaton W, et al. Socioeconomic inequalities in depression: A meta-  
14  
15 655 analysis. *Am J Epidemiol* 2003;157(2):98-112.  
16  
17 656 58. World Bank. Improving Macroeconomic and Financial Resilience: Cambodia Economic  
18  
19 657 Update April 2016. Washington DC: World Bank; 2016.  
20  
21 658 59. Noorbala AA, Mohammad K, Bagheri Yazdi SA, et al. Mental health survey of the adult  
22  
23 659 population in Iran. *Br J Psychiatry* 2004;184:70-3.  
24  
25 660 60. Mikolajczyk R, Maxwell A, El Ansari W, Naydenova V, Stock C, Ilieva S, Dudziak U,  
26  
27 661 Nagyova I. Prevalence of depressive symptoms in university students from Germany,  
28  
29 662 Denmark, Poland and Bulgaria. *Soc Psychiatry Psychiatr Epidemiol* 2008;43(2):105-12.  
30  
31 663 61. Franko DL, Striegel-Moore RH, Bean J, et al. Self-reported symptoms of depression in  
32  
33 664 late adolescence to early adulthood: A comparison of African-American and Caucasian  
34  
35 665 females. *J Adolesc Health* 2005;37(6):526-9.  
36  
37 666 62. Wade TJ, Cairney J, Pevalin DJ. Emergence of gender differences in depression during  
38  
39 667 adolescence: National panel results from three countries. *J Am Acad Child Adolesc*  
40  
41 668 *Psychiatry* 2002;41(2):190-8.  
42  
43 669 63. Vrana S, Lauterbach D. Prevalence of traumatic events and post-traumatic psychological  
44  
45 670 symptoms in a nonclinical sample of college students. *J Trauma Stress* 1994;7:289-302.  
46  
47 671 64. Teychenne M, Ball K, Salmon J. Physical activity and likelihood of depression in adults: A  
48  
49 672 review. *Prev Med* 2008;46(5):397-411.  
50  
51 673 65. Azar D, Ball K, Salmon J, et al. The association between physical activity and depressive  
52  
53 674 symptoms in young women: A review. *Ment Health Physic Act* 2008;1(2):82-8.  
54  
55 675 66. Chen L, Wang L, Qiu XH, et al. Depression among Chinese University Students:  
56  
57 676 Prevalence and Socio-Demographic Correlates. *PLoS One* 2013;8(3):e58379.

- 1  
2  
3 677 67. Schunert T, Khann S, Kao S, et al. Cambodian Mental Health Survey 2012. Phnom Penh:  
4  
5 678 Royal University of Phnom Penh; 2012.  
6  
7 679 68. McLaughlin D, Wickeri E (2012) Special Report: Mental Health and Human Rights in  
8  
9 680 Cambodia. New York: Leitner Center for International Law and Justice; 2012.  
10  
11 681 69. Aberdein C, Zimmerman C. Access to mental health and psychosocial services in  
12  
13 682 Cambodia by survivors of trafficking and exploitation: a qualitative study. Int J Ment  
14  
15 683 Health Syst 2015;9:16.  
16  
17  
18  
19  
20  
21  
22  
23  
24  
25  
26  
27  
28  
29  
30  
31  
32  
33  
34  
35  
36  
37  
38  
39  
40  
41  
42  
43  
44  
45  
46  
47  
48  
49  
50  
51  
52  
53  
54  
55  
56  
57  
58  
59  
60

STROBE Statement—Checklist of items that should be included in reports of *cross-sectional studies*

|                              | Item No | Recommendation                                                                                                                                                                                                                                                                                                                                                                                                                                                                                                               |
|------------------------------|---------|------------------------------------------------------------------------------------------------------------------------------------------------------------------------------------------------------------------------------------------------------------------------------------------------------------------------------------------------------------------------------------------------------------------------------------------------------------------------------------------------------------------------------|
| <b>Title and abstract</b>    | 1       | (a) Indicate the study's design with a commonly used term in the title or the abstract <a href="#">Confirmed (Lines 1-54)</a><br>(b) Provide in the abstract an informative and balanced summary of what was done and what was found. <a href="#">Confirmed (Lines 30-54)</a>                                                                                                                                                                                                                                                |
| <b>Introduction</b>          |         |                                                                                                                                                                                                                                                                                                                                                                                                                                                                                                                              |
| Background/rationale         | 2       | Explain the scientific background and rationale for the investigation being reported. <a href="#">Confirmed (Lines 67-110)</a>                                                                                                                                                                                                                                                                                                                                                                                               |
| Objectives                   | 3       | State specific objectives, including any prespecified hypotheses. <a href="#">Confirmed (Lines 108-110)</a>                                                                                                                                                                                                                                                                                                                                                                                                                  |
| <b>Methods</b>               |         |                                                                                                                                                                                                                                                                                                                                                                                                                                                                                                                              |
| Study design                 | 4       | Present key elements of study design early in the paper. <a href="#">Confirmed (Line 114)</a>                                                                                                                                                                                                                                                                                                                                                                                                                                |
| Setting                      | 5       | Describe the setting, locations, and relevant dates, including periods of recruitment, exposure, follow-up, and data collection. <a href="#">Confirmed (Line 114-116)</a>                                                                                                                                                                                                                                                                                                                                                    |
| Participants                 | 6       | (a) Give the eligibility criteria, and the sources and methods of selection of participants. <a href="#">Confirmed (Lines 124-133)</a>                                                                                                                                                                                                                                                                                                                                                                                       |
| Variables                    | 7       | Clearly define all outcomes, exposures, predictors, potential confounders, and effect modifiers. Give diagnostic criteria, if applicable. <a href="#">Confirmed (Lines 152-201)</a>                                                                                                                                                                                                                                                                                                                                          |
| Data sources/<br>measurement | 8*      | For each variable of interest, give sources of data and details of methods of assessment (measurement). Describe comparability of assessment methods if there is more than one group. <a href="#">Confirmed (Lines 159-205)</a>                                                                                                                                                                                                                                                                                              |
| Bias                         | 9       | Describe any efforts to address potential sources of bias. <a href="#">Confirmed (Lines 143-157)</a>                                                                                                                                                                                                                                                                                                                                                                                                                         |
| Study size                   | 10      | Explain how the study size was arrived at. <a href="#">Confirmed (116-122)</a>                                                                                                                                                                                                                                                                                                                                                                                                                                               |
| Quantitative variables       | 11      | Explain how quantitative variables were handled in the analyses. If applicable, describe which groupings were chosen and why. <a href="#">Confirmed (Lines 207-215)</a>                                                                                                                                                                                                                                                                                                                                                      |
| Statistical methods          | 12      | (a) Describe all statistical methods, including those used to control for confounding. <a href="#">Confirmed (Lines 216-221)</a><br>(b) Describe any methods used to examine subgroups and interactions. <a href="#">(Not applicable)</a><br>(c) Explain how missing data were addressed <a href="#">(Not applicable)</a><br>(d) If applicable, describe analytical methods taking account of sampling strategy. <a href="#">(Not applicable)</a><br>(e) Describe any sensitivity analyses. <a href="#">(Not applicable)</a> |
| <b>Results</b>               |         |                                                                                                                                                                                                                                                                                                                                                                                                                                                                                                                              |
| Participants                 | 13*     | (a) Report numbers of individuals at each stage of study—eg numbers potentially eligible, examined for eligibility, confirmed eligible, included in the study, completing follow-up, and analysed. <a href="#">Confirmed (Lines 235)</a><br>(b) Give reasons for non-participation at each stage <a href="#">(Not applicable)</a><br>(c) Consider use of a flow diagram <a href="#">(Not applicable)</a>                                                                                                                     |
| Descriptive data             | 14*     | (a) Give characteristics of study participants (eg demographic, clinical, social) and information on exposures and potential confounders. <a href="#">Confirmed (Lines 236-243)</a><br>(b) Indicate number of participants with missing data for each variable of interest. <a href="#">(Not applicable)</a>                                                                                                                                                                                                                 |
| Outcome data                 | 15*     | Report numbers of outcome events or summary measures. <a href="#">Confirmed (241-243)</a>                                                                                                                                                                                                                                                                                                                                                                                                                                    |
| Main results                 | 16      | (a) Give unadjusted estimates and, if applicable, confounder-adjusted estimates and                                                                                                                                                                                                                                                                                                                                                                                                                                          |

|                          |    |                                                                                                                                                                                                                       |
|--------------------------|----|-----------------------------------------------------------------------------------------------------------------------------------------------------------------------------------------------------------------------|
|                          |    | their precision (eg, 95% confidence interval). Make clear which confounders were adjusted for and why they were included. <a href="#">Confirmed (244-359)</a>                                                         |
|                          |    | (b) Report category boundaries when continuous variables were categorized. <a href="#">(Not applicable)</a>                                                                                                           |
|                          |    | (c) If relevant, consider translating estimates of relative risk into absolute risk for a meaningful time period. <a href="#">(Not applicable)</a>                                                                    |
| Other analyses           | 17 | Report other analyses done—eg analyses of subgroups and interactions, and sensitivity analyses. <a href="#">Not applicable.</a>                                                                                       |
| <b>Discussion</b>        |    |                                                                                                                                                                                                                       |
| Key results              | 18 | Summarise key results with reference to study objectives. <a href="#">Confirmed (Lines 362-368)</a>                                                                                                                   |
| Limitations              | 19 | Discuss limitations of the study, taking into account sources of potential bias or imprecision. Discuss both direction and magnitude of any potential bias. <a href="#">Confirmed (Lines 446-464)</a>                 |
| Interpretation           | 20 | Give a cautious overall interpretation of results considering objectives, limitations, multiplicity of analyses, results from similar studies, and other relevant evidence. <a href="#">Confirmed (Lines 369-445)</a> |
| Generalisability         | 21 | Discuss the generalisability (external validity) of the study results. <a href="#">Confirmed (Lines 446-448)</a>                                                                                                      |
| <b>Other information</b> |    |                                                                                                                                                                                                                       |
| Funding                  | 22 | Give the source of funding and the role of the funders for the present study and, if applicable, for the original study on which the present article is based. <a href="#">Confirmed (Lines 497-499)</a>              |

\*Give information separately for exposed and unexposed groups.

**Note:** An Explanation and Elaboration article discusses each checklist item and gives methodological background and published examples of transparent reporting. The STROBE checklist is best used in conjunction with this article (freely available on the Web sites of PLoS Medicine at <http://www.plosmedicine.org/>, Annals of Internal Medicine at <http://www.annals.org/>, and Epidemiology at <http://www.epidem.com/>). Information on the STROBE Initiative is available at [www.strobe-statement.org](http://www.strobe-statement.org).

# BMJ Open

## Social and behavioral factors associated with depressive symptoms among university students in Cambodia: A cross-sectional study

|                                 |                                                                                                                                                                                                                                                                                                                                                                                                                                                                                                                                                     |
|---------------------------------|-----------------------------------------------------------------------------------------------------------------------------------------------------------------------------------------------------------------------------------------------------------------------------------------------------------------------------------------------------------------------------------------------------------------------------------------------------------------------------------------------------------------------------------------------------|
| Journal:                        | <i>BMJ Open</i>                                                                                                                                                                                                                                                                                                                                                                                                                                                                                                                                     |
| Manuscript ID                   | bmjopen-2017-019918.R2                                                                                                                                                                                                                                                                                                                                                                                                                                                                                                                              |
| Article Type:                   | Research                                                                                                                                                                                                                                                                                                                                                                                                                                                                                                                                            |
| Date Submitted by the Author:   | 03-Sep-2018                                                                                                                                                                                                                                                                                                                                                                                                                                                                                                                                         |
| Complete List of Authors:       | Ngin, Chanrith; KHANA Center for Population Health Research; Royal University of Phnom Penh, Faculty of Development Studies<br>Pal, Khuondyla; KHANA Center for Population Health Research<br>Tuot, Sovannary; KHANA, KHANA Center for Population Health Research<br>Chhoun, Pheak; KHANA, KHANA Center for Population Health Research<br>Yi, Rosa; Royal University of Phnom Penh, Faculty of Development Studies<br>Yi, Siyan; KHANA, KHANA Center for Population Health Research; Touro University California, Center for Global Health Research |
| <b>Primary Subject Heading</b>: | Mental health                                                                                                                                                                                                                                                                                                                                                                                                                                                                                                                                       |
| Secondary Subject Heading:      | Public health, Epidemiology, Sociology, Health services research                                                                                                                                                                                                                                                                                                                                                                                                                                                                                    |
| Keywords:                       | Cross-sectional survey, Depressive symptoms, MENTAL HEALTH, Social and behavioral factors, University students, Cambodia                                                                                                                                                                                                                                                                                                                                                                                                                            |
|                                 |                                                                                                                                                                                                                                                                                                                                                                                                                                                                                                                                                     |

SCHOLARONE™  
Manuscripts

only

1  
2  
3 1 **Social and behavioral factors associated with depressive symptoms among university**  
4 **students in Cambodia: A cross-sectional study**  
5 2  
6

7 3  
8 4 Chanrith Ngin,<sup>1,2</sup> Khuondyla Pal,<sup>1</sup> Sovannary Tuot,<sup>1</sup> Pheak Chhoun,<sup>1</sup> Rosa Yi,<sup>2</sup> Siyan Yi<sup>1,3,4,\*</sup>

9  
10 5 <sup>1</sup>KHANA Center for Population Health Research, Cambodia

11 6 <sup>2</sup>Faculty of Development Studies, Royal University of Phnom Penh, Cambodia

12 7 <sup>3</sup>Center for Global Health Research, Touro University California, the United States

13 8 <sup>4</sup>Saw Swee Hock School of Public Health, National University of Singapore and National

14 9 University Health System, Singapore  
15  
16  
17  
18  
19

20 10  
21 11 \*Correspondence: Siyan Yi, No. 33, Street 71, Phnom Penh, Cambodia

22 12 Tel: +855-23-211-505 / Fax: +855-23-214-049 / Email: [siyan@doctor.com](mailto:siyan@doctor.com)  
23  
24  
25  
26  
27  
28  
29  
30  
31  
32  
33  
34  
35  
36  
37  
38  
39  
40  
41  
42  
43  
44  
45  
46  
47  
48  
49  
50  
51  
52  
53  
54  
55  
56  
57  
58  
59  
60



## 30 ABSTRACT

31 **Objective** To explore social and behavioral factors associated with depressive symptoms among  
32 university students in Cambodia.

33 **Design** Cross-sectional study.

34 **Settings** Two public universities, one in the capital city of Phnom Penh and another in  
35 Battambang provincial town.

36 **Participants** This study included 1,359 students randomly selected from all departments in the  
37 two universities using a multi-stage cluster sampling method for a self-administered  
38 questionnaire survey in 2015.

39 **Primary outcome measure** Depressive symptoms measured by using the Center for  
40 Epidemiologic Studies Depression scale (CES-D). All measures in the study were self-reported.

41 **Results** The proportion of students with depressive symptoms and severe depressive symptoms  
42 were 50.6% and 19.6%, respectively. After adjustment in multivariate logistic regression  
43 analysis, depressive symptoms remained significantly associated with poor academic  
44 performance (AOR= 7.31, 95% CI= 2.24-23.86), higher consumption of unhealthy food (AOR=  
45 1.72, 95% CI= 1.08-2.76), a negative self-perception about body shape (AOR= 0.54, 95% CI=  
46 0.29-0.99) and general health status (AOR= 2.99, 95% CI= 1.28-7.00), and limited physical  
47 activeness (AOR= 0.30, 95% CI= 0.16-0.58). Depressive symptoms also remained significantly  
48 associated with adverse childhood experiences including physical violence (AOR= 1.39, 95% CI=  
49 1.04-1.86), psychological abuse (AOR= 1.82, 95% CI= 1.37-2.42), and lack of general and medical  
50 care (AOR= 0.51, 95% CI= 0.30-0.86) by family during childhood.

51 **Conclusions** The key factors associated with depressive symptoms were family-related and  
52 individual behaviors and attitudes. Thus, efforts should be invested in comprehensive screening  
53 and intervention programs to diagnose those vulnerable students early, offer immediate  
54 treatment, and cater appropriate support.

55

### 56 **Strengths and limitations of this study**

- 57 • This research is among a very few studies in developing countries in which standardized  
58 tools are used and rigorous analyses are performed.

- 1  
2  
3 59 • It included a large sample of students randomly selected from all departments in two  
4 public universities – one in the capital city and the other in a provincial town – using a  
5 60 multi-stage cluster sampling method.  
6  
7 61  
8  
9 62 • Limitations of the study, however, included the representativeness of the study sample,  
10 the cross-sectional nature of the data that limits causation inferences, unknown validity  
11 63 of the scales used to measure important constructs in Cambodian contexts, and  
12 64 potential bias of self-reported measures.  
13  
14 65  
15  
16 66  
17

## 18 67 INTRODUCTION

19  
20 68 Several studies have suggested that the aspects of mental health among university students are  
21 69 considerably poorer than that of their peers in the general population.<sup>1-5</sup> Depression is one of  
22 the most prevalent mental health problems among university students, and the prevalence is  
23 70 rising.<sup>6-7</sup> There are varied prevalence estimates of depressive symptoms among university  
24 71 students, ranging from in the area of 10%<sup>8-11</sup> to in the region of 20%<sup>12</sup> and up to 40% and  
25 72 80%.<sup>13-15</sup> However, the mean prevalence of depression in university students stands at 30.6%.<sup>6</sup>  
26  
27 73  
28  
29 74 University students are in a critical period of life since they transition from adolescence to  
30 75 adulthood, which requires them to make many major decisions. During this period, they  
31 76 encounter tremendous pressures, chiefly from economic stress, academic demands,  
32 77 interpersonal relationships, and struggles with making crucial decisions.<sup>16</sup>  
33  
34  
35  
36  
37

38 78 Depression manifests in a wide range of symptoms, encompassing sleep and eating  
39 79 disturbances, lack of self-care, poor concentration, anxiety, and disinterest in everyday  
40 80 activities.<sup>17</sup> For university students, depression is correlated with poor academic  
41 81 achievements,<sup>18</sup> drop-out,<sup>19-20</sup> relationship instability,<sup>21</sup> suicidal ideation and attempts,<sup>18-22-23</sup>  
42 82 poor work performance,<sup>24</sup> substance abuse,<sup>25-26</sup> acute infectious illnesses,<sup>27</sup> and poor physical  
43 83 and mental health in general.<sup>28-29</sup> Moreover, depression in this early period can build up  
44 84 negative consequences in adult life through its impacts on career prospects and social  
45 85 relationships.<sup>30-31</sup>  
46  
47  
48  
49  
50  
51  
52

53 86 Thus, tackling depression among university students is vital since most lifetime mental  
54 87 disorders commence during the university age,<sup>32</sup> and their mental health has essential  
55  
56  
57  
58  
59  
60

1  
2  
3 88 ramifications for campus health services in particular and mental health policy-making in  
4 general.<sup>33 34</sup> Put another way, from a public health standpoint, early detection and prevention  
5 89 of mental health problems among young adults in higher education is paramount.  
6  
7 90 Comprehension of their salient psychological distress, namely depression, and its correlates  
8  
9 91 would enable tailor-made and early screening and intervention programs to reduce mental  
10  
11 92 health problems in this population. This is integral for their educational performance and  
12  
13 93 triumph in their prospective profession as well as for the national advancement since they are  
14  
15 94 future leaders.  
16

17  
18 96 The prevalence of depression is induced by many factors, including study populations,  
19  
20 97 socio-demographics,<sup>16 35</sup> study sites,<sup>16 36</sup> diagnostic tools and sampling methods,<sup>36 37</sup> and socio-  
21  
22 98 cultural environments.<sup>16</sup> Contextualization of facets linked with depression thus is significant  
23  
24 99 for mitigation measures.

25 100 In Cambodia, little is known about social and behavioral determinants of depressive  
26  
27 101 symptoms among student populations. In 2012, a study on 1,943 students at 11 junior high and  
28  
29 102 high schools found that exposure to violence among community members, peers, or family was  
30  
31 103 a predictor for depressive symptoms in the students.<sup>38 39</sup> A 2013 qualitative study on a sample  
32  
33 104 of 28 students at a Cambodian university found that life events, problems of everyday life, and  
34  
35 105 availability of social support were the main stress factors affecting university students' life  
36  
37 106 satisfaction.<sup>40</sup> Moreover, exposure to daily hassles was a stress factor having a strong impact on  
38  
39 107 students' psychological and somatic responses. Nonetheless, no research has been conducted  
40  
41 108 to examine social and behavioral determinants of depression among Cambodian university  
42  
43 109 students. This study therefore intends to identify factors associated with depressive symptoms  
44  
45 110 among university students in Cambodia.

46 111

## 47 112 **METHODS**

### 48 113 **Study sites and population**

49 114 This cross-sectional study was conducted with students at the University of Battambang (UB) in  
50  
51 115 Battambang province and the Royal University of Phnom Penh (RUPP) in the capital city of  
52  
53 116 Cambodia in June and July 2015. Epi Info (Centers for Disease Control and Prevention, Atlanta,  
54  
55  
56  
57  
58  
59  
60

1  
2  
3 117 GA) was used to calculate the sample size from the university student population of  
4  
5 118 approximately 168,000.<sup>41</sup> The anticipated percentage frequency was not known, so 50% was  
6  
7 119 put for the calculation to prevent any underestimated prevalence. Based on a 95% confidence  
8  
9 120 interval (CI) and a +5% margin of error, the minimum sample size required for this study was  
10  
11 121 767 students. Adjusted for 10% of incomplete responses, missing data, and rejection rate, the  
12  
13 122 final minimum required sample size was 850 students.  
14  
15

### 16 124 **Patient and public involvement**

17  
18 125 The development of the research questions and outcome measures was informed by university  
19  
20 126 students' priorities, experience, and preferences gathered through consultative meetings with  
21  
22 127 representatives of students, faculty members, and school administrators. The workshops aimed  
23  
24 128 to collect inputs from the representatives for designing the study and developing the study  
25  
26 129 protocol and materials. The representatives were also invited to participate in the study finding  
27  
28 130 dissemination workshops in each participating university.  
29

### 30 131

### 31 132 **Sampling and data collection procedure**

32 133 A multi-stage cluster sampling method was used to select the participants. First, the two  
33  
34 134 universities were purposively selected, considering administration and logistic limitations. All  
35  
36 135 departments of the selected universities were included in the study. In each department, a non-  
37  
38 136 proportionate quota sampling method was used to select the sample from a name list provided  
39  
40 137 by the department administrator to meet the required sample size. On the designated date of  
41  
42 138 data collection, all selected students were approached by trained data collectors with support  
43  
44 139 from a school administrator. Questionnaires and instructions were then distributed to them in a  
45  
46 140 classroom for self-administration, which took approximately 30min to complete.  
47

### 48 141

### 49 142 **Questionnaire development and training**

50  
51 143 We first developed a structured questionnaire in English and translated it into Khmer, the  
52  
53 144 national language of Cambodia. Then, the Khmer questionnaire was back-translated into  
54  
55 145 English by a local expert to check its accuracy. The Khmer questionnaire was pretested with a  
56  
57  
58  
59  
60

1  
2  
3 146 sample of 20 students at RUPP to ensure that the wording and contents were culturally suitable  
4  
5 147 and clearly understandable. We also received comments on the questionnaire from experts  
6  
7 148 working on health and education in Cambodia. The questionnaire was finalized based on their  
8  
9 149 feedback and findings from the pretest. The questionnaire is available on request from the  
10  
11 150 corresponding author.

12 151 A two-day training on the study protocol and data collection methods was provided to  
13  
14 152 the data enumerators and supervisors. The training focused on building familiarity with the  
15  
16 153 study protocol and questionnaire, interview techniques, privacy assurance, and confidentiality.  
17  
18 154 It also addressed quality control strategies, such as rechecking and reviewing the  
19  
20 155 questionnaires after administration, and resolving issues that might arise during the fieldwork.  
21  
22 156 The data collection supervisors were instructed to perform regular reviews with the data  
23  
24 157 enumerators to monitor progress and settle any issues occurring during the process.

25 158

## 27 159 **Variables and measurements**

### 29 160 *Depressive symptoms*

30  
31 161 Depressive symptoms were assessed by using the Center for Epidemiologic Studies Depression  
32  
33 162 scale (CES-D).<sup>42</sup> This scale consists of 20 questions addressing six symptoms of depression,  
34  
35 163 including depressed mood, guilt or worthlessness, helplessness or hopelessness, psychomotor  
36  
37 164 retardation, loss of appetite, and sleep disturbance experienced during the preceding week.  
38  
39 165 Each question is scored on a scale of 0 to 3 according to the frequency of the symptoms, and  
40  
41 166 the total CES-D score ranges from 0 to 60. To calculate the total score, four items (I felt I was  
42  
43 167 just as good as other people, I felt hopeful about the future, I was happy, and I enjoyed life)  
44  
45 168 were reverse coded. The criterion validity of the CES-D scale has been well established in  
46  
47 169 Western<sup>42</sup> and Asian<sup>43</sup> populations. We defined depressive symptoms as present when a  
48  
49 170 subject had a CES-D score of  $\geq 16$ . A cutoff value of  $\geq 23$  was also used to define severe  
50  
51 171 depressive state.<sup>44</sup>

52 172

### 53 173 *Socio-demographic characteristics, substance use, and sexual behaviors*

1  
2  
3 174 We adapted standardized tools from the most recent Cambodia Demographic and Health  
4  
5 175 Survey<sup>45</sup> as well as from our previous student and young people health surveys in Cambodia<sup>38 39</sup>  
6  
7 176 <sup>46-48</sup> to measure socioeconomic characteristics, sexual behaviors with different partners, and  
8  
9 177 substance use (alcohol, tobacco, and illicit drugs). Socio-demographic characteristics of the  
10  
11 178 respondents included study site, gender, age, marital status, academic year, living situations,  
12  
13 179 perceived family economic status, and perceived academic performance.  
14  
15

### 16 181 *Health related behaviors*

17  
18 182 We used the Health Behavior Survey,<sup>49</sup> which was designed as a broad survey of health-related  
19  
20 183 behaviors and beliefs, components of the “National College Health Risk Behavior Survey”  
21  
22 184 (1997),<sup>50</sup> and the Global School-based Student Health Survey.<sup>51</sup> Each health behavior area was  
23  
24 185 addressed by only a limited number of items. For example, frequency of consumption of fast  
25  
26 186 food in an average week was assessed by a question, “On average, how many times do you eat  
27  
28 187 fast food per week?” with response options of 0 time, 1-2 times a week, and 3 or more times a  
29  
30 188 week. Similar questions and response options were used to assess consumption of several  
31  
32 189 other kinds of healthy and unhealthy food, such as high-fat snack or fruits/vegetables. Self-  
33  
34 190 ratings were also used for some questions, such as perceived body size (rated from very  
35  
36 191 overweight to very underweight) and general health status (rated from very good to very poor).  
37

### 38 193 *Adverse childhood experiences (ACEs)*

39  
40 194 Five questions were adapted from the brief screening version of the Childhood Trauma  
41  
42 195 Questionnaire to measure ACEs.<sup>52</sup> The five yes/no questions asked about the experiences of  
43  
44 196 physical abuse, emotional abuse, sexual abuse, physical neglect, and emotional neglect during  
45  
46 197 childhood.  
47

### 48 49 199 *Self-rated health*

50  
51 200 SF-12 Health Survey (SF-12) was used to measure self-rated health.<sup>53 54</sup> The SF-12 is a  
52  
53 201 multipurpose short-form generic measure of health status. It is a subset of the larger SF-36 and  
54  
55 202 monitors health in general and in specific populations. The SF-12 measures eight health  
56  
57  
58  
59  
60

1  
2  
3 203 aspects, namely physical functioning, role limitations due to physical health problems, bodily  
4  
5 204 pain, general health, vitality (energy/fatigue), social functioning, role limitations due to  
6  
7 205 emotional problems, and mental health (psychological distress and psychological well-being).  
8  
9 206

## 10 207 **Data analyses**

11  
12 208 Double data entry was performed using EpiData version 3 (Odense, Denmark).  $\chi^2$  test, or  
13  
14 209 Fisher's exact test when a sample size was smaller than five in one cell, was used for categorical  
15  
16 210 variables, and Student's *t*-test was used for continuous variables to compare socio-  
17  
18 211 demographic characteristics, health risk behaviors (sexual behaviors, substance use, and eating  
19  
20 212 behaviors), self-rated health (SF-12), and ACEs among students with depressive symptoms,  
21  
22 213 defined by a CES-D score of  $\geq 16$ , to those among students without depressive symptoms. The  
23  
24 214 same comparisons were also made among students with and without severe depressive  
25  
26 215 symptoms, defined by a CES-D score of  $\geq 23$ .

27 216 In multivariate models, we first included all variables significantly associated with  
28  
29 217 depressive symptoms in the bivariate analyses at a level of *p*-value  $< 0.05$  simultaneously in the  
30  
31 218 models. Variables with a *p*-value  $> 0.05$  were then removed, and the models were refitted. The  
32  
33 219 steps were repeated until all *p*-values of the remaining variables were  $< 0.05$  in the final models.  
34  
35 220 Adjusted odds ratios (AOR) were obtained and presented with CI and *p*-values. SPSS version 22  
36  
37 221 (IBM Corporation, New York) was used for all statistical analyses.  
38  
39 222

## 40 223 **Ethical considerations**

41  
42 224 The National Ethics Committee for Health Research of the Ministry of Health, Cambodia,  
43  
44 225 approved the study protocol and materials (No. 191NECHR). Participation in this study was  
45  
46 226 voluntary. In the process of obtaining a written informed consent, students were made clear  
47  
48 227 that they could refuse or discontinue their participation at any time and for any reason. The  
49  
50 228 confidentiality and privacy of the respondents were protected by administering the  
51  
52 229 questionnaires in a private premise and by excluding personal identifiers from the data and  
53  
54 230 field notes. After completing the survey, each participant received a small gift (costing  
55  
56 231 approximately \$US 2.0) for their time compensation.  
57  
58  
59  
60

232

233 **RESULTS**234 **Socio-demographic characteristics**

235 The study sample included 493 students (36.3%) from UB and 866 students (63.7%) from RUPP.  
 236 About half (50.8%) of the respondents were male, with a mean age of 21.3 years [standard  
 237 deviation (SD)= 2.3]. Less than 2.0% ( $n= 26$ ) of the students initially selected for the study  
 238 declined the participation, mostly due to their time constrains. They were then replaced by the  
 239 next gender-matched student in the student name list. The majority of the respondents (97.9%)  
 240 were unmarried, and 43.4% were living with their parents. Regarding their family economic  
 241 status, 59.2% reported that their family was neither rich nor poor. The proportion of students  
 242 with depressive symptoms and severe depressive symptoms were 50.6% and 19.6%,  
 243 respectively.

244 Table 1 shows that a significantly higher proportion of students with depressive  
 245 symptoms were from UB ( $p= 0.004$ ) and from a poorer family ( $p= 0.002$ ) and reported poorer  
 246 academic performance ( $p< 0.001$ ). Similarly, a significantly higher proportion of students with  
 247 severe depressive symptoms were female ( $p= 0.002$ ) and from a poorer family ( $p= 0.04$ ) and  
 248 reported poorer academic performance ( $p< 0.001$ ).

249

250 **Table 1** Comparisons of socio-demographic characteristics of university students with and without  
 251 depressive symptoms

| Characteristics     | Depressive symptoms |                |                      | Severe depressive symptoms <sup>†</sup> |                |                      |
|---------------------|---------------------|----------------|----------------------|-----------------------------------------|----------------|----------------------|
|                     | No                  | Yes            | P-value <sup>‡</sup> | No                                      | Yes            | P-value <sup>‡</sup> |
| Study site          |                     |                | 0.004                |                                         |                | 0.08                 |
| Battambang          | 218 (44.2)          | 275 (55.8)     |                      | 384 (77.9)                              | 109 (22.1)     |                      |
| Phnom Penh          | 454 (52.4)          | 412 (47.6)     |                      | 709 (81.9)                              | 157 (18.1)     |                      |
| Gender              |                     |                | 0.20                 |                                         |                | 0.002                |
| Female              | 319 (47.7)          | 350 (52.3)     |                      | 515 (77.0)                              | 154 (23.0)     |                      |
| Male                | 353 (51.2)          | 337 (48.8)     |                      | 578 (83.8)                              | 112 (16.2)     |                      |
| Age (mean $\pm$ SD) | 21.3 $\pm$ 2.4      | 21.4 $\pm$ 2.3 | 0.82                 | 21.4 $\pm$ 2.3                          | 21.1 $\pm$ 2.4 | 0.12                 |
| Marital status      |                     |                | 0.34                 |                                         |                | 0.08                 |



|    |                                  |            |            |             |            |
|----|----------------------------------|------------|------------|-------------|------------|
| 1  |                                  |            |            |             |            |
| 2  |                                  |            |            |             |            |
| 3  | Unmarried                        | 655 (49.2) | 675 (50.8) | 1066 (80.2) | 264 (19.8) |
| 4  |                                  |            |            |             |            |
| 5  | Married                          | 17 (58.6)  | 12 (41.4)  | 27 (93.1)   | 2 (6.9)    |
| 6  |                                  |            |            |             |            |
| 7  | Academic year                    |            |            | 0.59        | 0.66       |
| 8  | 1                                | 240 (48.4) | 256 (51.6) | 394 (79.4)  | 102 (20.6) |
| 9  |                                  |            |            |             |            |
| 10 | 2                                | 145 (51.6) | 136 (48.4) | 224 (79.7)  | 57 (20.3)  |
| 11 |                                  |            |            |             |            |
| 12 | 3                                | 123 (49.0) | 128 (51.0) | 201 (80.1)  | 50 (19.9)  |
| 13 |                                  |            |            |             |            |
| 14 | 4                                | 164 (49.5) | 167 (50.5) | 274 (82.8)  | 57 (17.2)  |
| 15 | Currently living with            |            |            | 0.35        | 0.70       |
| 16 | Parents                          | 297 (49.9) | 298 (50.1) | 486 (81.7)  | 109 (18.3) |
| 17 |                                  |            |            |             |            |
| 18 | Relatives                        | 81 (45.0)  | 99 (55.0)  | 139 (77.2)  | 41 (22.8)  |
| 19 |                                  |            |            |             |            |
| 20 | Sibling                          | 87 (56.1)  | 68 (43.9)  | 124 (80.0)  | 31 (20.0)  |
| 21 |                                  |            |            |             |            |
| 22 | Friend                           | 162 (50.2) | 161 (49.8) | 258 (79.9)  | 65 (20.1)  |
| 23 |                                  |            |            |             |            |
| 24 | Spouse/partners                  | 10 (47.6)  | 11 (52.4)  | 19 (90.5)   | 2 (9.5)    |
| 25 |                                  |            |            |             |            |
| 26 | Alone                            | 26 (41.9)  | 36 (58.1)  | 50 (80.6)   | 12 (19.4)  |
| 27 |                                  |            |            |             |            |
| 28 | Other                            | 9 (39.1)   | 14 (60.9)  | 17 (73.9)   | 6 (26.1)   |
| 29 | Perceived family economic status |            |            | 0.002       | 0.04       |
| 30 | Well-off/quite                   | 248 (55.7) | 197 (44.3) | 374 (84.0)  | 71 (16.0)  |
| 31 |                                  |            |            |             |            |
| 32 | well-off                         |            |            |             |            |
| 33 | Neither poor nor                 | 398 (47.0) | 448 (53.0) | 669 (71.1)  | 177 (20.9) |
| 34 |                                  |            |            |             |            |
| 35 | well-off                         |            |            |             |            |
| 36 | Poor                             | 26 (38.2)  | 42 (61.8)  | 50 (73.5)   | 18 (26.5)  |
| 37 |                                  |            |            |             |            |
| 38 | Perceived academic performance   |            |            | <0.001      | <0.001     |
| 39 |                                  |            |            |             |            |
| 40 | Very good                        | 44 (77.2)  | 13 (22.8)  | 52 (91.2)   | 5 (5.8)    |
| 41 |                                  |            |            |             |            |
| 42 | Good                             | 180 (59.0) | 123 (40.6) | 263 (86.8)  | 40 (13.2)  |
| 43 |                                  |            |            |             |            |
| 44 | Fairly good                      | 301 (50.5) | 295 (49.5) | 484 (81.2)  | 112 (18.8) |
| 45 |                                  |            |            |             |            |
| 46 | Fair                             | 138 (37.7) | 228 (62.3) | 275 (75.1)  | 91 (24.9)  |
| 47 |                                  |            |            |             |            |
| 48 | Poor                             | 9 (24.3)   | 28 (75.7)  | 19 (51.4)   | 18 (48.6)  |

252 Abbreviation: SD, standard deviation.

253 Values are numbers of subjects (%) for categorical variables and means  $\pm$  standard deviation (SD) for  
254 continuous variables.

255 \* Defined by a Center for Epidemiology Studies Depression Scale (CES-D) score of  $\geq 16$ .

256 † Defined by a CES-D score of  $\geq 23$ .

257 ‡ Chi-square test was used for categorical variables; independent Student's t-test was used for continuous  
258 variables.

259

260 **Health risk behaviors**

261 As shown in Table 2, a significantly higher proportion of students with depressive symptoms  
 262 reported consuming unhealthy food frequently, such as high-fat snack ( $p= 0.001$  for depressive  
 263 symptoms;  $p< 0.001$  for severe depressive symptoms), margarine, butter, or meat fat ( $p= 0.02$   
 264 for depressive symptoms;  $p< 0.001$  for severe depressive symptoms). A significantly lower  
 265 proportion of students with depressive symptoms reported consuming of healthy food  
 266 frequently, such as fruits and vegetables ( $p= 0.009$  for depressive symptoms;  $p= 0.007$  for  
 267 severe depressive symptoms), or lean protein ( $p< 0.001$  for depressive symptoms;  $p= 0.03$  for  
 268 severe depressive symptoms). A significantly higher proportion of students with depressive  
 269 symptoms reported not having desert over the past week ( $p= 0.003$  for depressive symptoms;  
 270  $p= 0.008$  for severe depressive symptoms). Moreover, a significantly higher proportion of  
 271 students with depressive symptoms perceived that their body size was very overweight or very  
 272 underweight ( $p< 0.001$  for both depressive symptoms and severe depressive symptoms).

273

274 **Table 2** Comparisons of health risk behaviors among university students with and without depressive  
 275 symptoms

| Health and health risk behaviors       | Depressive symptoms <sup>*</sup> |            |                      | Severe depressive symptoms <sup>†</sup> |            |                      |
|----------------------------------------|----------------------------------|------------|----------------------|-----------------------------------------|------------|----------------------|
|                                        | No                               | Yes        | P-value <sup>‡</sup> | No                                      | Yes        | P-value <sup>‡</sup> |
| Current tobacco smokers                | 5 (33.3)                         | 10 (66.7)  |                      | 12 (80.0)                               | 3 (20.0)   | 0.97                 |
| Self-perception regarding alcohol use  |                                  |            | 0.25                 |                                         |            | 0.004                |
| Non drinker                            | 425 (50.7)                       | 413 (49.3) |                      | 681 (81.3)                              | 157 (18.7) |                      |
| Occasional drinker                     | 247 (47.4)                       | 271 (52.6) |                      | 412 (78.7)                              | 106 (21.3) |                      |
| Regular drinker                        | 0 (0.0)                          | 3 (100)    |                      | 0 (0.0)                                 | 3 (100)    |                      |
| Current illicit drug users             | 0 (0.0)                          | 4 (100)    | 0.05                 | 1 (25.0)                                | 3 (75.0)   | 0.03                 |
| Condom use at last sex                 | 39 (47.0)                        | 44 (53.0)  | 0.95                 | 73 (88.0)                               | 10 (12.0)  | 0.08                 |
| Diagnosed with an STI                  | 4 (40.0)                         | 6 (60.0)   | 0.75                 | 110 (84.0)                              | 21 (16.0)  | 0.67                 |
| Thought of ending life                 | 40 (24.8)                        | 121 (75.2) | <0.001               | 84 (52.2)                               | 77 (47.8)  | <0.001               |
| Attempted to end life                  | 5 (20.0)                         | 20 (80.0)  | 0.63                 | 11 (44.0)                               | 14 (56.0)  | 0.47                 |
| Frequency of eating fast food per week |                                  |            | 0.49                 |                                         |            | 0.24                 |

|                                                 |            |            |            |            |
|-------------------------------------------------|------------|------------|------------|------------|
| 0 time                                          | 410 (49.3) | 421 (50.7) | 679 (81.7) | 152 (18.3) |
| 1-2 times                                       | 231 (50.7) | 225 (49.3) | 360 (78.9) | 96 (21.1)  |
| 3 times or more                                 | 31 (43.1)  | 41 (56.9)  | 54 (75.0)  | 18 (25.0)  |
| Frequency of daily soft drink consumption       |            |            | 0.31       | 0.01       |
| 0 time                                          | 105 (46.5) | 121 (53.5) | 178 (78.8) | 48 (21.2)  |
| 1-2 times                                       | 399 (51.2) | 380 (48.8) | 647 (83.1) | 132 (16.9) |
| 3 times or more                                 | 168 (47.5) | 186 (52.5) | 268 (75.7) | 86 (24.3)  |
| Frequency of weekly high-fat snack consumption  |            |            | 0.001      | <0.001     |
| 0 time                                          | 162 (52.8) | 145 (47.2) | 260 (84.7) | 47 (15.3)  |
| 1-2 times                                       | 443 (51.0) | 426 (49.0) | 711 (81.8) | 158 (18.2) |
| 3 times or more                                 | 67 (36.6)  | 116 (63.4) | 122 (66.7) | 61 (33.3)  |
| Frequency of weekly dessert consumption         |            |            | 0.003      | 0.008      |
| 0 time                                          | 106 (40.6) | 155 (59.4) | 192 (73.6) | 69 (26.4)  |
| 1-2 times                                       | 434 (52.7) | 389 (47.3) | 676 (82.1) | 147 (17.9) |
| 3 times or more                                 | 132 (48.0) | 143 (52.0) | 225 (81.8) | 50 (18.2)  |
| Frequency of weekly fruit/vegetable consumption |            |            | 0.009      | 0.007      |
| 0 time                                          | 50 (37.3)  | 84 (62.7)  | 94 (70.1)  | 40 (29.9)  |
| 1-2 times                                       | 390 (51.7) | 365 (48.3) | 617 (81.7) | 138 (18.3) |
| 3 times or more                                 | 232 (49.4) | 238 (50.6) | 382 (81.3) | 88 (12.7)  |
| Frequency of weekly lean protein consumption    |            |            | <0.001     | 0.03       |
| 0 time                                          | 57 (34.8)  | 107 (65.2) | 119 (72.6) | 45 (27.4)  |
| 1-2 times                                       | 453 (51.8) | 421 (48.2) | 714 (81.7) | 160 (18.3) |
| 3 times or more                                 | 162 (50.5) | 159 (49.5) | 260 (81.0) | 61 (19.0)  |
| Amount of margarine/butter/meat fat consumption |            |            | 0.02       | <0.001     |
| None/very little                                | 296 (52.4) | 269 (47.6) | 471 (83.4) | 94 (16.6)  |
| Some                                            | 339 (48.7) | 357 (51.3) | 558 (80.2) | 138 (19.8) |
| A lot                                           | 37 (37.8)  | 61 (62.2)  | 64 (65.3)  | 34 (34.7)  |
| Self-perception about body size                 |            |            | <0.001     | <0.001     |
| About right                                     | 275 (55.4) | 221 (44.6) | 428 (86.3) | 68 (13.7)  |
| Very overweight                                 | 27 (34.2)  | 52 (65.8)  | 55 (69.6)  | 24 (30.4)  |
| Slightly overweight                             | 161 (48.9) | 168 (51.1) | 247 (75.1) | 82 (24.9)  |
| Slightly underweight                            | 191 (49.6) | 194 (50.4) | 319 (82.9) | 66 (17.1)  |

Very underweight      18 (25.7)    52 (74.3)                      44 (62.9)    26 (37.1)

276 *Abbreviations: STI, sexually transmitted infections.*

277 *Values are numbers of subjects (%).*

278 *\*Defined by a Center for Epidemiology Studies Depression Scale (CES-D) score of  $\geq 16$ .*

279 *†Defined by a CES-D score of  $\geq 23$ .*

280 *‡Chi-square test was used or Fisher's exact test was used as appropriate.*

281

## 282 **Self-rated health (SF-12)**

283 Table 3 shows that significantly higher proportion of students with depressive symptoms  
 284 perceived that their general health status was poor ( $p < 0.001$  for both depressive symptoms  
 285 and severe depressive symptoms). A significantly higher proportion of students with depressive  
 286 symptoms reported higher levels of limitation in several daily activities, such as limitation in  
 287 moderate activities ( $p < 0.001$  for depressive symptoms;  $p = 0.02$  for severe depressive  
 288 symptoms), climbing several flights of stairs ( $p < 0.001$  for depressive symptoms), or other kinds  
 289 of activities in the past four weeks as a result of their physical or emotional health problems ( $p <$   
 290  $0.001$  for both depressive symptoms and severe depressive symptoms). Further, they reported  
 291 higher levels of problems in several other physical and emotional health aspects in the past four  
 292 weeks, such as a feeling that they had accomplished less than they would like ( $p < 0.001$  for  
 293 both depressive symptoms and severe depressive symptoms), pain interferes with their normal  
 294 work ( $p < 0.001$  for both depressive symptoms and severe depressive symptoms), having less  
 295 energy ( $p < 0.001$  for both depressive symptoms and severe depressive symptoms), down-  
 296 hearted and blue ( $p < 0.001$  for both depressive symptoms and severe depressive symptoms),  
 297 and that their physical health interferes with their social acts ( $p < 0.001$  for both depressive  
 298 symptoms and severe depressive symptoms).

299

300 **Table 3** Comparisons of self-rated health (SF-12) among university students with and without depressive  
 301 symptoms

| Self-rated health (SF-12)                | Depressive symptoms* |            |          | Severe depressive symptoms† |           |          |
|------------------------------------------|----------------------|------------|----------|-----------------------------|-----------|----------|
|                                          | No                   | Yes        | P-value‡ | No                          | Yes       | P-value‡ |
| Self-perception on general health status |                      |            | <0.001   |                             |           | <0.001   |
| Very good                                | 106 (64.2)           | 59 (35.8)  |          | 147 (89.1)                  | 18 (10.9) |          |
| Good                                     | 380 (58.5)           | 270 (41.5) |          | 566 (87.1)                  | 84 (12.9) |          |

|                                                                                       |            |            |        |            |            |        |
|---------------------------------------------------------------------------------------|------------|------------|--------|------------|------------|--------|
| Neither good nor poor                                                                 | 176 (38.0) | 287 (62.0) |        | 351 (75.8) | 112 (24.2) |        |
| Poor                                                                                  | 10 (12.3)  | 71 (87.7)  |        | 29 (35.8)  | 52 (64.2)  |        |
| Limitation in moderate activities on a typical day                                    |            |            | <0.001 |            |            | 0.02   |
| Greatly limited                                                                       | 20 (28.2)  | 51 (71.8)  |        | 50 (70.4)  | 21 (29.6)  |        |
| Mildly limited                                                                        | 291 (45.6) | 347 (54.4) |        | 505 (79.2) | 133 (20.8) |        |
| Not limited                                                                           | 361 (55.5) | 289 (44.5) |        | 538 (82.8) | 112 (17.2) |        |
| Limitation in climbing several flights of stairs                                      |            |            | <0.001 |            |            | 0.24   |
| Greatly limited                                                                       | 64 (35.8)  | 115 (64.2) |        | 140 (78.2) | 39 (21.8)  |        |
| Mildly limited                                                                        | 323 (47.8) | 353 (52.2) |        | 536 (79.3) | 140 (20.7) |        |
| Not limited                                                                           | 285 (56.5) | 219 (43.5) |        | 417 (82.7) | 87 (17.2)  |        |
| Limitation in other kinds of activities in past 4 weeks                               | 271 (37.8) | 446 (62.2) | <0.001 | 516 (72.0) | 201 (28.0) | <0.001 |
| Accomplished less than you would like in past 4 weeks as a result of emotional health | 377 (61.9) | 232 (38.1) | <0.001 | 553 (50.6) | 197 (26.3) | <0.001 |
| Accomplished less than you would like in past 4 weeks as a result of physical health  | 304 (67.3) | 148 (32.7) | <0.001 | 675 (74.4) | 232 (25.6) | <0.001 |
| Did activities less carefully than usual in past 4 weeks                              | 378 (41.8) | 526 (58.2) | <0.001 | 677 (74.9) | 227 (25.1) | <0.001 |
| Pain interferes with your normal work in past 4 weeks                                 |            |            | <0.001 |            |            | <0.001 |
| Not at all                                                                            | 141 (75.8) | 45 (24.2)  |        | 176 (94.6) | 10 (5.4)   |        |
| A little bit                                                                          | 401 (57.6) | 295 (42.4) |        | 635 (91.2) | 61 (8.8)   |        |
| Moderately                                                                            | 106 (32.9) | 216 (31.4) |        | 216 (67.1) | 106 (32.9) |        |
| Quite a bit                                                                           | 23 (16.5)  | 116 (83.5) |        | 62 (44.6)  | 77 (55.4)  |        |
| Extremely                                                                             | 1 (6.3)    | 15 (93.8)  |        | 4 (25.0)   | 12 (75.0)  |        |
| Feeling calm and peaceful in past 4 weeks                                             |            |            | 0.33   |            |            | 0.06   |
| A lot of the time                                                                     | 22 (42.3)  | 30 (57.7)  |        | 38 (73.1)  | 14 (26.9)  |        |
| Most of the time                                                                      | 68 (53.5)  | 59 (46.5)  |        | 92 (72.9)  | 35 (27.6)  |        |
| A good bit of time                                                                    | 115 (50.9) | 111 (49.1) |        | 188 (83.2) | 38 (16.2)  |        |

|                                                       |            |            |            |            |
|-------------------------------------------------------|------------|------------|------------|------------|
| Some of the time                                      | 278 (46.8) | 316 (53.2) | 477 (80.3) | 117 (17.7) |
| A little of the time                                  | 170 (51.8) | 158 (48.2) | 274 (83.5) | 54 (16.5)  |
| None of the time                                      | 19 (59.4)  | 13 (40.6)  | 24 (75.0)  | 8 (25.0)   |
| Having a lot of energy in past 4 weeks                |            |            | <0.001     | <0.001     |
| A lot of the time                                     | 46 (61.3)  | 29 (38.7)  | 66 (88.0)  | 9 (12.0)   |
| Most of the time                                      | 111 (68.9) | 50 (31.1)  | 149 (92.5) | 12 (7.5)   |
| A good bit of time                                    | 245 (56.8) | 186 (43.2) | 383 (88.9) | 48 (11.1)  |
| Some of the time                                      | 207 (41.5) | 292 (58.5) | 364 (72.9) | 135 (27.1) |
| A little of the time                                  | 57 (33.7)  | 112 (66.3) | 116 (68.6) | 53 (31.4)  |
| None of the time                                      | 6 (25.0)   | 18 (75.0)  | 15 (62.5)  | 9 (37.5)   |
| Feeling down-hearted and blue in past 4 weeks         |            |            | <0.001     | <0.001     |
| A lot of the time                                     | 7 (21.9)   | 25 (78.1)  | 14 (43.8)  | 18 (56.3)  |
| Most of the time                                      | 8 (8.3)    | 88 (91.7)  | 36 (37.5)  | 60 (62.5)  |
| A good bit of the time                                | 42 (17.9)  | 171 (80.3) | 117 (54.9) | 96 (45.1)  |
| Some of the time                                      | 222 (46.7) | 253 (53.3) | 412 (86.7) | 63 (13.3)  |
| A little of the time                                  | 354 (71.5) | 141 (28.5) | 469 (94.7) | 26 (5.3)   |
| None of the time                                      | 39 (81.3)  | 9 (18.8)   | 45 (93.8)  | 3 (6.3)    |
| Physical health interferes social act in past 4 weeks |            |            | <0.001     | <0.001     |
| A lot of the time                                     | 4 (33.3)   | 8 (66.7)   | 6 (50.0)   | 6 (50.0)   |
| Most of the time                                      | 10 (23.3)  | 33 (76.7)  | 18 (41.9)  | 58 (58.1)  |
| Some of the time                                      | 146 (38.1) | 237 (61.9) | 275 (71.8) | 108 (28.2) |
| A little of the time                                  | 355 (53.7) | 306 (46.3) | 568 (85.9) | 93 (14.1)  |
| None of the time                                      | 157 (60.4) | 103 (39.6) | 226 (26.9) | 34 (13.2)  |

302 *Values are numbers of subjects (%) for categorical variables.*

303 *\*Defined by a Center for Epidemiology Studies Depression Scale (CES-D) score of  $\geq 16$ .*

304 *†Defined by a CES-D score of  $\geq 23$ .*

305 *‡Chi-square test was used for categorical variables or Fisher's exact test was used as appropriate.*

306

### 307 **Adverse childhood experiences (ACEs)**

308 As shown in Table 4, a significantly higher proportion of students with depressive symptoms  
 309 reported having been hit, slapped, or kicked by a parent or guardian ( $p < 0.001$  for both  
 310 depressive symptoms and severe depressive symptoms); that people in their family had said  
 311 hurtful or insulting things to them ( $p < 0.001$  for both depressive symptoms and severe

312 depressive symptoms); and that someone had tried to touch them or make them touch  
 313 him/her in a sexual way ( $p= 0.001$  for depressive symptoms;  $p< 0.001$  for severe depressive  
 314 symptoms). In contrast, significantly lower proportion of students with depressive symptoms  
 315 reported that there had been someone to take care of them and take them to medical care  
 316 when they got sick ( $p= 0.04$  for depressive symptoms;  $p= 0.03$  for severe depressive symptoms),  
 317 and someone who helped them feel that they were loved and important ( $p= 0.03$  for depressive  
 318 symptoms;  $p< 0.001$  for severe depressive symptoms).

319

320 **Table 4** Comparisons of adverse childhood experiences among university students with and without  
 321 depressive symptoms

| Adverse childhood experiences                                                      | Depressive symptoms* |            |                      | Severe depressive symptoms <sup>†</sup> |            |                      |
|------------------------------------------------------------------------------------|----------------------|------------|----------------------|-----------------------------------------|------------|----------------------|
|                                                                                    | No                   | Yes        | P-value <sup>‡</sup> | No                                      | Yes        | P-value <sup>‡</sup> |
| Had been hit, slapped, kicked, by a parent/guardian                                | 200 (38.2)           | 323 (61.8) | <0.001               | 384 (73.4)                              | 139 (26.6) | <0.001               |
| People in my family had said hurtful or insulting things to me                     | 297 (39.0)           | 464 (61.0) | <0.001               | 558 (73.3)                              | 203 (26.7) | <0.001               |
| Someone had tried to touch me or make me touch them in a sexual way                | 87 (39.2)            | 135 (60.8) | 0.001                | 159 (71.6)                              | 63 (28.4)  | <0.001               |
| There had been someone to take care me and take me to medical care when I got sick | 636 (50.2)           | 632 (49.8) | 0.04                 | 1028 (81.1)                             | 240 (18.9) | 0.03                 |
| There had been someone who helped me feel that I was loved and important           | 647 (50.1)           | 644 (49.9) | 0.03                 | 1050 (81.3)                             | 266 (19.6) | <0.001               |

322 *Values are numbers of subjects (%).*

323 *\*Defined by a Center for Epidemiology Studies Depression Scale (CES-D) score of  $\geq 16$ .*

324 *<sup>†</sup>Defined by a CES-D score of  $\geq 23$ .*

325 *<sup>‡</sup>Chi-square test was used.*

326

**327 Risk factors of depressive symptoms**

328 Results of multivariate logistic analyses are shown in Table 5. After controlling for potential  
329 confounding factors, the odds of depressive symptoms increased significantly with self-  
330 reported poor academic performance (depressive symptoms: AOR=7.31, 95% CI=2.24-23.86;  
331 severe depressive symptoms: AOR=7.38, 95% CI=1.75-10.94) and high consumption of  
332 unhealthy food, including high-fat snack, margarine, butter, or meat fat (depressive symptoms:  
333 AOR=1.72, 95% CI=1.08-2.76; severe depressive symptoms: AOR=2.13, 95% CI=1.15-3.95). The  
334 odds decreased significantly with the perception that their body size was slightly underweight  
335 compared to the perception that their body size was very overweight (depressive symptoms:  
336 AOR= 0.54, 95% CI= 0.29-0.99; severe depressive symptoms: AOR= 0.37, 95% CI= 0.18-0.77).

337 Regarding self-rated health, the odds of depressive symptoms increased significantly  
338 with the perception that their general health status was poor (depressive symptoms: AOR=  
339 2.99, 95% CI=1.28-7.00; severe depressive symptoms: AOR=5.43, 95% CI=2.19-13.46) and the  
340 report of higher level of limitation in moderate activities (depressive symptoms: AOR= 0.30  
341 (95% CI= 0.16-0.58), higher level of pain interference with their normal work (depressive  
342 symptoms: AOR= 10.43, 95% CI= 1.05-10.94; severe depressive symptoms: AOR= 10.02, 95% CI=  
343 1.99-9.28), and higher level of feeling down-hearted and blue (depressive symptoms: AOR=  
344 6.69, 95% CI= 1.87-23.90; severe depressive symptoms: AOR= 8.72, 95% CI= 1.69-14.86).

345 For ACEs, the odds of depressive symptoms increased significantly with the report of  
346 having been hit, slapped, or kicked by a parent or guardian (depressive symptoms: AOR= 1.39,  
347 95% CI= 1.04-1.86) and that people in their family had said hurtful or insulting things to them  
348 (depressive symptoms: AOR= 1.82, 95% CI= 1.37-2.42; severe depressive symptoms: AOR= 2.18,  
349 95% CI=1.46-3.24) during their childhood. In contrast, the odds of depressive symptoms  
350 decreased significantly with the report that there had been someone to take care of them and  
351 take them to medical care when they got sick (depressive symptoms: AOR= 0.51, 95% CI= 0.30-  
352 0.86; severe depressive symptoms: AOR= 0.26, 95% CI= 0.13-0.52).

353

**354 Table 5** Factors associated with depressive symptoms and severe depressive symptoms



| Variables in the final model                       | Depressive symptoms <sup>†</sup> |         | Severe depressive symptoms <sup>‡</sup> |         |
|----------------------------------------------------|----------------------------------|---------|-----------------------------------------|---------|
|                                                    | AOR (95% CI)                     | P-value | AOR (95% CI)                            | P-value |
| Perceived academic performance                     |                                  |         |                                         |         |
| Very good                                          | Reference                        |         | Reference                               |         |
| Good                                               | 2.28 (1.01-5.15)                 | 0.04    | 1.22 (0.35-4.19)                        | 0.76    |
| Fairly good                                        | 3.51 (1.58-7.78)                 | 0.002   | 2.15 (0.65-7.11)                        | 0.21    |
| Fair                                               | 5.30 (2.35-11.93)                | <0.001  | 2.52 (0.75-8.43)                        | 0.13    |
| Poor                                               | 7.31 (2.24-23.86)                | 0.001   | 7.38 (1.75-10.94)                       | 0.006   |
| Frequency of weekly high-fat snack consumption     |                                  |         |                                         |         |
| 0 time                                             | Reference                        |         | Reference                               |         |
| 1-2 times                                          | 0.99 (0.72-1.37)                 | 0.95    | 1.25 (0.78-1.99)                        | 0.36    |
| 3 times or more                                    | 1.72 (1.08-2.76)                 | 0.02    | 2.13 (1.15-3.95)                        | 0.02    |
| Frequency of weekly lean protein consumption       |                                  |         |                                         |         |
| 0 time                                             | Reference                        |         | Reference                               |         |
| 1-2 times                                          | 0.52 (0.34-0.79)                 | 0.002   | 0.69 (0.41-1.18)                        | 0.17    |
| 3 times or more                                    | 0.62 (0.38-0.96)                 | 0.04    | 0.80 (0.44-1.47)                        | 0.48    |
| Amount of margarine/butter/meat fat consumption    |                                  |         |                                         |         |
| None/very little                                   |                                  |         | Reference                               |         |
| Some                                               |                                  |         | 0.98 (0.66-1.46)                        | 0.91    |
| A lot                                              |                                  |         | 1.92 (1.02-3.64)                        | 0.04    |
| Self-perception about body shape                   |                                  |         |                                         |         |
| Very overweight                                    | Reference                        |         |                                         |         |
| Slightly overweight                                | 0.56 (0.31-1.07)                 | 0.08    | 0.65 (0.32-1.14)                        | 0.25    |
| About right                                        | 0.58 (0.32-1.05)                 | 0.07    | 0.45 (0.22-0.93)                        | 0.03    |
| Slightly underweight                               | 0.54 (0.29-0.99)                 | 0.04    | 0.37 (0.18-0.77)                        | 0.008   |
| Very underweight                                   | 0.92 (0.38-2.25)                 | 0.86    | 0.38 (0.14-0.99)                        | 0.04    |
| Self-perception on general health status           |                                  |         |                                         |         |
| Very good                                          |                                  |         |                                         |         |
| Good                                               | 1.05 (0.68-1.64)                 | 0.82    | 1.19 (0.60-2.38)                        | 0.62    |
| Fair                                               | 1.58 (0.99-2.51)                 | 0.05    | 1.47 (0.73-2.96)                        | 0.28    |
| Poor                                               | 2.99 (1.28-7.00)                 | 0.01    | 5.43 (2.19-13.46)                       | <0.001  |
| Limitation in moderate activities on a typical day |                                  |         |                                         |         |

|    |                                                                                       |                    |        |                   |        |
|----|---------------------------------------------------------------------------------------|--------------------|--------|-------------------|--------|
| 1  |                                                                                       |                    |        |                   |        |
| 2  |                                                                                       |                    |        |                   |        |
| 3  | Greatly limited                                                                       | Reference          |        | Reference         |        |
| 4  |                                                                                       |                    |        |                   |        |
| 5  | Mildly limited                                                                        | 0.39 (0.20-0.74)   | 0.004  | 0.64 (0.29-1.34)  | 0.23   |
| 6  |                                                                                       |                    |        |                   |        |
| 7  | Not limited                                                                           | 0.30 (0.16-0.58)   | <0.001 | 0.63 (0.30-1.36)  | 0.24   |
| 8  | Pain interferes with your normal work in past 4 weeks                                 |                    |        |                   |        |
| 9  |                                                                                       |                    |        |                   |        |
| 10 | Not at all                                                                            | Reference          |        | Reference         |        |
| 11 |                                                                                       |                    |        |                   |        |
| 12 | A little bit                                                                          | 1.68 (1.08-2.61)   | 0.02   | 1.01 (0.46-2.22)  | 0.99   |
| 13 |                                                                                       |                    |        |                   |        |
| 14 | Moderately                                                                            | 3.10 (1.89-5.10)   | <0.001 | 3.69 (1.68-7.11)  | 0.001  |
| 15 |                                                                                       |                    |        |                   |        |
| 16 | Quite a bit                                                                           | 4.14 (2.13-8.05)   | <0.001 | 4.68 (2.01-10.92) | <0.001 |
| 17 |                                                                                       |                    |        |                   |        |
| 18 | Extremely                                                                             | 10.43 (1.05-10.94) | 0.04   | 10.02 (1.99-9.28) | 0.005  |
| 19 | Feeling down-hearted and blue in past 4 weeks                                         |                    |        |                   |        |
| 20 |                                                                                       |                    |        |                   |        |
| 21 | None of the time                                                                      | Reference          |        | Reference         |        |
| 22 |                                                                                       |                    |        |                   |        |
| 23 | A little of the time                                                                  | 0.52 (0.63-3.66)   | 0.35   | 1.02 (0.24-4.29)  | 0.98   |
| 24 |                                                                                       |                    |        |                   |        |
| 25 | Some of the time                                                                      | 3.42 (1.42-8.23)   | 0.006  | 1.83 (0.45-7.45)  | 0.40   |
| 26 |                                                                                       |                    |        |                   |        |
| 27 | A good bit of the time                                                                | 7.70 (3.02-19.66)  | <0.001 | 6.01 (1.45-4.85)  | 0.01   |
| 28 |                                                                                       |                    |        |                   |        |
| 29 | Most of the time                                                                      | 20.71 (6.47-66.37) | <0.001 | 9.04 (2.31-13.71) | 0.002  |
| 30 |                                                                                       |                    |        |                   |        |
| 31 | A lot of the time                                                                     | 6.69 (1.87-23.90)  | 0.003  | 8.72 (1.69-14.86) | 0.01   |
| 32 | Had been hit, slapped, kicked, by a parent/guardian                                   |                    |        |                   |        |
| 33 |                                                                                       |                    |        |                   |        |
| 34 | No                                                                                    | Reference          |        | Reference         |        |
| 35 |                                                                                       |                    |        |                   |        |
| 36 | Yes                                                                                   | 1.39 (1.04-1.86)   | 0.03   | 1.11 (0.75-1.65)  | 0.59   |
| 37 | People in my family had said hurtful or insulting things to me                        |                    |        |                   |        |
| 38 |                                                                                       |                    |        |                   |        |
| 39 | No                                                                                    | Reference          |        | Reference         |        |
| 40 |                                                                                       |                    |        |                   |        |
| 41 | Yes                                                                                   | 1.82 (1.37-2.42)   | <0.001 | 2.18 (1.46-3.24)  | <0.001 |
| 42 | There had been someone to take care of me and take me to medical care when I got sick |                    |        |                   |        |
| 43 |                                                                                       |                    |        |                   |        |
| 44 | No                                                                                    | Reference          |        | Reference         |        |
| 45 |                                                                                       |                    |        |                   |        |
| 46 | Yes                                                                                   | 0.51 (0.30-0.86)   | 0.01   | 0.26 (0.13-0.52)  | <0.001 |

355 Abbreviations: AOR, adjusted odds ratio; CI, confidence interval.

356 \*Variables in the table were the ones that remained statistically significant in the final multivariate  
357 logistic regression model after several steps of model fitting.

358 † Defined by a Center for Epidemiology Studies Depression Scale (CES-D) score of  $\geq 16$ .

359 ‡ Defined by a CES-D score of  $\geq 23$ .

360

## 361 DISCUSSION

1  
2  
3 362 This study explored the prevalence of depressive symptoms and unearthed a number of social  
4  
5 363 and behavioral factors correlated with the symptoms among university students in Cambodia.  
6  
7 364 The proportion of students with depressive symptoms and severe depressive symptoms was  
8  
9 365 50.6% and 19.6%, respectively. The salient factors comprised cultural and socio-economic  
10  
11 366 dimensions (socio-economic background and lack of general and medical care by family during  
12  
13 367 their childhood), individual behaviors and attitudes (poor academic accomplishment,  
14  
15 368 consumption of unhealthy food, negative perception about their body and their general health  
16  
17 369 status, and limited physical activeness), and nurture-related facets (physical violence and  
18  
19 370 psychological abuse by family during their childhood).

20 371 The bivariate outcomes display that students from the provincial university (UB) and a  
21  
22 372 poorer family were more susceptible to depressive symptoms. Albeit not manifesting in the  
23  
24 373 multivariate model, these factors are corroborated by the existing scholarship. Various studies  
25  
26 374 revealed that university students from rural areas and low socio-economic backgrounds were  
27  
28 375 predisposed to higher depression.<sup>1 16 28 55 56</sup> This could be explained by an economic situation  
29  
30 376 where students with a rural background tended to stipulate a poorer family status. Plus,  
31  
32 377 financial vulnerability could further exacerbate depression in students from low-income  
33  
34 378 families. A meta-analysis of 60 studies unveiled that people in the lowest socio-economic  
35  
36 379 quintile had 1.81 the probability of depression compared with those in the highest socio-  
37  
38 380 economic quintile.<sup>57</sup> A global study on 17,348 university students from 23 high-, middle-, and  
39  
40 381 low-income countries also uncovered that higher depressive symptoms were recorded among  
41  
42 382 students in low-income countries and economies with greater income inequality.<sup>16</sup> The  
43  
44 383 Cambodian economy has been growing rapidly in terms of income per capita; yet, income gaps  
45  
46 384 between the rich and the poor and between rural and urban areas remain large.<sup>58</sup> The gaps in  
47  
48 385 income and material growth, which typify economic conditions, may induce people's mental  
49  
50 386 health problems. In another word, poor economic status may bring about low self-esteem and  
51  
52 387 self-confidence, which would lead to depression.

53 388 Our multivariate results depict that students with depressive symptoms, regardless of  
54  
55 389 severity, tended to report poor academic performance and higher consumption of unhealthy  
56  
57 390 food. These findings conform to a systematic review of 24 studies<sup>6</sup> and studies in Asia, such as

1  
2  
3 391 China,<sup>7</sup> which pinpoint low scholastic merit and suicidal ideation as consistent correlates of  
4  
5 392 depression in university students probably as a culmination of poor concentration and solitude.  
6  
7 393 On the consumption of unhealthy food, the transition from adolescence to adulthood, and thus  
8  
9 394 the changes in lifestyle such as living arrangements and independence, might have rendered  
10  
11 395 university students to indulge in unhealthy food, as pinpointed by a meta-analysis of 39 studies  
12  
13 396 in China.<sup>7</sup> As afore-mentioned, more than half of our sample were not living with their parents;  
14  
15 397 therefore, it might have been hard for them to maintain healthy daily food. Conversely,  
16  
17 398 depression might have made students care-free about themselves and consequently eat  
18  
19 399 unhealthily.<sup>17</sup> This implies that nutrition education for both physical and mental health,  
20  
400 stressing healthy food for the body and mind, is imperative for university students.

21  
401 Students with depressive symptoms, regardless of magnitude, also tended to have a  
22  
23 402 negative perception about their body and their general health status. These findings confirms  
24  
25 403 the general perception among depressed people who are not gratified with their body and  
26  
27 404 health,<sup>17</sup> although these relationships require a cautious interpretation given that CES-D also  
28  
29 405 measures some aspects of negative self-perception. Further, depressed students were more  
30  
31 406 likely to have limited physical activeness, more pain interference with their normal work, and  
32  
33 407 more dismay or sorrow. These findings are consistent with findings from previous studies in  
34  
35 408 different populations and settings.<sup>59 60</sup> However, the interpretation of these complex  
36  
37 409 relationships must be made with caution given that the nature of the data does not allow  
38  
39 410 causal relationship to be established.

40  
411 Finally, students with depressive symptoms, disregard of severity, were more likely to  
41  
42 412 encounter physical violence by their parent or guardian, psychological abuse by their family  
43  
44 413 members, and lack of general and medical care by their family when they were growing up. As  
45  
46 414 for the physical violence and psychological abuse, this finding tends to acquiesce with a study in  
47  
48 415 Cambodia that postulates that exposure to violence within family is associated with depression  
49  
50 416 in high school students.<sup>38 39</sup> On the lack of general and medical care by family, a Chinese study  
51  
52 417 on 5,245 students at six universities found that students who had a poor parental relationship  
53  
54 418 were more vulnerable to depression.<sup>61</sup> Also, a global study on 17,348 university students from  
55  
56 419 23 high, middle-, and low-income countries iterated that university students with less

1  
2  
3 420 individualistic cultures, particularly in Asia, reported higher extents of depressive symptoms.<sup>16</sup>  
4  
5 421 Students of these cultures longed for more familial and societal ties and assistance, and thus  
6  
7 422 felt depressed once this social capital was unavailable.<sup>16</sup> This highlights a significant role of  
8  
9 423 family bonds and scaffolding in association with depression among university students. The lack  
10  
11 424 of social support from the family presumably would only be a factor for students living  
12  
13 425 independently. But, for those living with relatives, friends, or spouse, they would still have such  
14  
15 426 support.

16 427         A study on a sample of 2,671 respondents in nine provinces and a capital city in 2012  
17  
18 428 revealed that Cambodia greatly needs more and better counseling and mental health services.<sup>62</sup>  
19  
20 429 The study also pointed out the shortage of skilled professionals in the field of mental health,  
21  
22 430 particularly those with high clinical and counseling skills to treat mental disorders. In 2012,  
23  
24 431 Cambodia had only 49 trained psychiatrists and 45 psychiatric nurses working in mental health  
25  
26 432 facilities and private practices for a population of approximately 15 million.<sup>62 63</sup> This number  
27  
28 433 equates to approximately 0.2 psychiatrists per 100,000 population, which is similar to the  
29  
30 434 average in Southeast Asia.<sup>63</sup> Many health staff lack training, supervision, and experience in  
31  
32 435 these areas. Only about 300 doctors completed basic mental healthcare training.<sup>64</sup> At university  
33  
34 436 level, the 2012 study called for more awareness raising for self-care and burnout prevention  
35  
36 437 and mental health counseling services for staff and students.<sup>62</sup> Given the paucity of mental  
37  
38 438 health services in general, let alone at universities, our findings fuel the needs for more and  
39  
40 439 better mental healthcare in Cambodia. Further to medical care, universities should provide  
41  
42 440 measures, such as student loans and healthy canteens, to mitigate some key predictors of  
43  
44 441 depression among students, such as financial hardship and poor diets.

45 442         This study contains certain limitations. First, it examined students at only two public  
46  
47 443 universities, one in the capital city and the other in a province. Hence, its findings cannot be  
48  
49 444 generalized at a national level. Second, the cross-sectional design did not enable an  
50  
51 445 establishment of the causal linkages between depressive symptoms and the related factors.  
52  
53 446 Given the temporal order and the cross-sectional nature of the data, causal relationships  
54  
55 447 between the variables could not be derived. Potential bi-directionality of the associations could  
56  
57 448 occur either way. For instance, physical inactivity could cause depression. Nonetheless, the

1  
2  
3 449 reverse could also be true—that depression could lead to inactivity, and of course both could  
4  
5 450 be true simultaneously, where depressive symptoms worsen with physical inactivity, making  
6  
7 451 physical activity less likely. Third, this study employed self-reported data, which might have  
8  
9 452 been subject to over-reporting and under-reporting caused by the negative cognitive biases  
10  
11 453 associated with depression as well as possible recall bias. Future studies should attempt to use  
12  
13 454 more objective data (e.g., linking participants' responses to university records of academic  
14  
15 455 performance) to increase validity of the information. Nonetheless, the quality of the data was  
16  
17 456 ensured by thorough training of the enumerators and field supervisors on the study protocols  
18  
19 457 and data collection method. Finally, the main outcome measure (CES-D) and some other  
20  
21 458 measures, such as ACEs and SF-12, were modified from other research and have not been  
22  
23 459 validated in the Cambodian settings. Therefore, the interpretation of the findings must be  
24  
25 460 made with caution. Notwithstanding these malfeasances, the findings of this study offer first  
26  
27 461 and foremost implications for policy development and future research in the Cambodian  
28  
29 462 context.

30 463

### 31 464 **CONCLUSIONS**

32 465 This study identified social and behavioral factors associated with depressive symptoms among  
33  
34 466 Cambodian students at two universities. While causation could not be drawn between these  
35  
36 467 factors and depression, we surmise that these factors were inter-twined, and thus need to be  
37  
38 468 addressed in an integrated and holistic fashion.

39  
40 469 These findings render three major implications. First, given the current educational  
41  
42 470 reform and labor market that demand better quality and ergo more competition among  
43  
44 471 university students, the correlates of depressive symptoms could not be more critical for  
45  
46 472 tackling for the time being. Failure to ameliorate these factors would jeopardize the  
47  
48 473 qualification and career development of this populace and finally the human capital for nation-  
49  
50 474 building. Second, these findings warrant an acceleration of on-campus counseling services for  
51  
52 475 university students throughout the course of studentship. Efforts should be invested in  
53  
54 476 comprehensive screening and intervention programs to diagnose those susceptible students  
55  
56 477 early, offer immediate treatment, and cater appropriate support. Universities could play very

1  
2  
3 478 important roles in taking this research forwards by providing future research outputs to  
4  
5 479 improve mental health of the students that would in turn improve their academic outcomes.  
6  
7 480 Ultimately, the jurisdiction of refining students' mental state should go beyond universities to  
8  
9 481 families and pertinent governmental bodies at large, provided we are to assist the young to  
10  
11 482 overcome their academic challenges and enjoy a prosperous post-graduation life. Further  
12  
13 483 research could delve into changing lifestyles and their associations with depressive symptoms  
14  
15 484 among a larger sample of university students. Furthermore, validation studies are required to  
16  
17 485 develop and validate reliable instruments for use in Cambodian populations.  
18  
19 486

20 487 **Acknowledgements** The authors thank research assistants; representatives of students, faculty  
21  
22 488 members, and school administrators who supported the development of the study design and  
23  
24 489 tools; and the study participants for their contribution to this study.  
25  
26 490

27 491 **Contributions** SY, KP and TS conceived research questions, designed the study and developed  
28  
29 492 the research protocol and tools. SY and CN analyzed the data and interpreted the results and  
30  
31 493 drafted the manuscript. KP, PC and RY supported the protocol and tools development and were  
32  
33 494 responsible for training and data collection. All authors contributed to the writing and approved  
34  
35 495 the final manuscript.  
36  
37 496

38 497 **Funding** Data used for this analysis were collected as part of a larger study funded by the  
39  
40 498 United States Agency for International Development (USAID). The funder had no role in study  
41  
42 499 design, data collection and analyses, decision to publish, or preparation of the manuscript.  
43  
44 500

45 501 **Disclaimer** Content of this paper is the responsibility of the authors and does not reflect the  
46  
47 502 view of USAID or our respective institutions  
48  
49 503

50  
51 504 **Competing interests** None declared  
52  
53 505

1  
2  
3 506 **Ethics approval** The National Ethics Committee for Health Research of the Ministry of Health,  
4 507 Cambodia approved this study (Reference no. 082NECHR), and a written informed consent was  
5 508 obtained from each participant.  
6  
7  
8

9 509  
10 510 **Data sharing statement** Data used for this analysis are available upon request from the  
11 511 Principal Investigator (Dr. Siyan Yi) at [siyan@doctor.com](mailto:siyan@doctor.com). The data cannot be made publicly  
12 512 available due to ethical restriction.  
13  
14  
15

16 513

## 17 514 **REFERENCES**

- 18  
19 515 1. Bayram N, Bilgel N. The prevalence and socio-demographic correlations of depression,  
20 516 anxiety and stress among a group of university students. *Soc Psychiatry Psychiatr*  
21 517 *Epidemiol* 2008;43(8):667-672.  
22  
23 518 2. Stewart-Brown S, Evans J, Patterson J, et al. The health of students in institutes of higher  
24 519 education: an important and neglected public health problem? *J Public Health Med*  
25 520 2000;22(4):492-9.  
26  
27 521 3. Tomoda A, Mori K, Kimura M, et al. One-year prevalence and incidence of depression  
28 522 among first-year university students in Japan: a preliminary study. *Psychiatry Clin*  
29 523 *Neurosci* 2000;54(5):583-8.  
30  
31 524 4. Voelker R. Mounting student depression taxing campus mental health services. *JAMA*  
32 525 2003;289(16):2055-6.  
33  
34 526 5. Wong JG, Cheung EP, Chan KK, et al. Web-based survey of depression, anxiety and stress  
35 527 in first-year tertiary education students in Hong Kong. *Aust N Z J Psychiatry*  
36 528 2006;40(9):777-82.  
37  
38 529 6. Ibrahim AK, Kelly SJ, Adams CE, et al. A systematic review of studies of depression  
39 530 prevalence in university students. *J Psychiatr Res* 2013;47:391-400.  
40  
41 531 7. Lei XY, Xiao LM, Liu YN, et al. Prevalence of Depression among Chinese University  
42 532 Students: A Meta-Analysis. *PLoS One*. 2016;11(4):e0153454.  
43  
44 533 8. Goebert D, Thompson D, Takeshita J, et al. Depressive symptoms in medical students  
45 534 and residents: a multischool study. *Acad Med* 2009;84(2):236-41.  
46  
47  
48  
49  
50  
51  
52  
53  
54  
55  
56  
57  
58  
59  
60



- 1  
2  
3 535 9. Vazquez F, Blanco V. Symptoms of depression and related factors among Spanish  
4  
5 536 university students. *Psychol Rep* 2006;99(2):583-90.  
6
- 7 537 10. Vazquez F, Blanco V. Prevalence of DSM-IV major depression among Spanish university  
8  
9 538 students. *J Am Coll Health* 2008;57(2):165-71.
- 10  
11 539 11. Chen L, Wang L, Qiu XH, et al. Depression among Chinese university students:  
12  
13 540 prevalence and socio-demographic correlates. *PLoS One*. 2013;8(3):e58379.
- 14  
15 541 12. Shamsuddin K, Fadzil F, Ismail WS, et al. Correlates of depression, anxiety and stress  
16  
17 542 among Malaysian university students. *Asian J Psychiatr* 2013;6(4):318-23.
- 18  
19 543 13. Bayati A, Beigi M, Salehi M. Depression prevalence and related factors in Iranian  
20  
21 544 students. *Pak J Biol Sci* 2009;12(20):1371-5.
- 22  
23 545 14. Garlow S, Rosenberg J, Moore J, et al. Depression, desperation, and suicidal ideation in  
24  
25 546 college students: results from the American Foundation for Suicide Prevention College  
26  
27 547 screening project at Emory University. *Depress Anxiety* 2008;25(6):482-8.
- 28  
29 548 15. Khan M, Mahmood S, Badshah A, et al. Prevalence of depression, anxiety and their  
30  
31 549 associated factors among medical students in Karachi, Pakistan. *J Pak Med Assoc* 2006  
32  
33 550 56(12):583-6.
- 34  
35 551 16. Steptoe A, Tsuda A, Tanaka Y. Depressive symptoms, socio-economic background, sense  
36  
37 552 of control, and cultural factors in university students from 23 countries. *Int J Behav Med*  
38  
39 553 2007;14:97-107.
- 40  
41 554 17. National Collaborating Centre for Mental Health (UK). *Depression: The Treatment and*  
42  
43 555 *Management of Depression in Adults (Updated Edition)*. Leicester (UK): British  
44  
45 556 Psychological Society; 2010.
- 46  
47 557 18. Hysenbegasi A, Hass S, Rowland C. The impact of depression on the academic  
48  
49 558 productivity of university students. *J Ment Health Policy Econ* 2005;8:145-51.
- 50  
51 559 19. Heiligenstein E, Guenther G, Hsu K, et al. Depression and academic impairment in  
52  
53 560 college students. *J Am Coll Health* 1996;45:59-64.
- 54  
55 561 20. Meilman PW, Manley C, Gaylor MS, et al. Medical withdrawals from college for mental  
56  
57 562 health reasons and their relation to academic performance. *J Am Coll Health*  
58  
59 563 1992;40:217-23.

- 1  
2  
3 564 21. Whitton S, Whisman M. Relationship satisfaction, instability and depression. *J Fam*  
4  
5 565 Psychol 2010;24:791-4.  
6  
7 566 22. Jeon H. Depression and suicide. *J Korean Med Ass* 2011;54:370-5.  
8  
9 567 23. Furr S, Westefeld J, McConnell G, et al. Suicide and depression among college students:  
10  
11 568 A decade later. *Profess Psychol* 2001;32(1):97-100.  
12  
13 569 24. Harvey S, Glozier N, Henderson M, et al. Depression and work performance: an  
14  
15 570 ecological study using web-based screening. *Occup Med* 2011;61:209-11.  
16  
17 571 25. Mushquash AR, Stewart SH, Sherry SB, et al. Depressive symptoms are a vulnerability  
18  
19 572 factor for heavy episodic drinking: A short-term, four-wave longitudinal study of  
20  
21 573 undergraduate women. *Addict Behav* 2013;38:2180-6.  
22  
23 574 26. Buckner JD, Keough ME, Schmidt NB. Problematic alcohol and cannabis use among  
24  
25 575 young adults: The roles of depression and discomfort and distress tolerance. *Addict*  
26  
27 576 *Behav* 2007;32:1957-63.  
28  
29 577 27. Adams TB, Wharton CM, Quilter L, et al. The association between mental health and  
30  
31 578 acute infectious illness among a national sample of 18-to 24-year-old college students. *J*  
32  
33 579 *Am Coll Health* 2008;56:657-64.  
34  
35 580 28. Bostanci M, Ozdel O, Oguzhanoglu NK, et al. Depressive symptomatology among  
36  
37 581 university students in Denizli, Turkey: Prevalence and sociodemographic correlates.  
38  
39 582 *Croat Med J* 2005;46:96-100.  
40  
41 583 29. Eller T, Aluoja A, Vasar V, et al. Symptoms of anxiety and depression in Estonian medical  
42  
43 584 students with sleep problems. *Depress Anxiety* 2006;23:250-6.  
44  
45 585 30. Denise L, Terrie M, Avshalom C, et al. Psychiatric disorder in a birth cohort of young  
46  
47 586 adults: Prevalence, comorbidity, clinical significance, and new case incidence from ages  
48  
49 587 11-21. *J Consult Clin Psychol* 1996;64:552-62.  
50  
51 588 31. Aalto-Setälä T, Marttunen M, Tuulio-Henriksson A, et al. One-month prevalence of  
52  
53 589 depression and other DSM-IV disorders among young adults. *Psychol Med* 2001;31:791-  
54  
55 590 801.  
56  
57  
58  
59  
60

- 1  
2  
3 591 32. Kessler RC, Berglund P, Demler O, et al. Lifetime prevalence and age-of-onset  
4 592 distributions of DSM-IV disorders in the National Comorbidity Survey Replication. Arch  
5 593 Gen Psychiatry 2005;62(6):593-602.  
6  
7 594 33. Kessler RC, Walters EE. Epidemiology of DSM-III-R major depression and minor  
8 595 depression among adolescents and young adults in the National Comorbidity Survey.  
9 596 Depress Anxiety 1998;7(1):3-14.  
10  
11 597 34. Vinas Poch F, Villar E, Caparros B, et al. Feelings of hopelessness in a Spanish university  
12 598 population: Descriptive analysis and its relationship to adapting to university, depressive  
13 599 symptomatology and suicidal ideation. Soc Psychiatry Psychiatr Epidemiol  
14 600 2004;39(4):326-34.  
15  
16 601 35. Kaplan G, Shema S, Leite C. Socioeconomic determinants of psychological wellbeing: The  
17 602 role of income, income change, and income sources during the course of 29 years. Ann  
18 603 Epidemiol 2008;18:531-7.  
19  
20 604 36. Weissman M, Bland R, Canino G, et al. Cross-national epidemiology of major depression  
21 605 and bipolar disorder. JAMA 1996;276:293-9.  
22  
23 606 37. Marsella A. Thoughts on cross-cultural studies on the epidemiology of depression. Cult  
24 607 Medicine Psychiatry 1978;2:343-57.  
25  
26 608 38. Yi S, Poudel KC, Yasuoka J, et al. Sibling care, school performance, and depression  
27 609 among adolescent caretakers in Cambodia. Asian J Psychiatr 2012;5(2):132-6.  
28  
29 610 39. Yi S, Poudel KC, Yasuoka J, et al. Exposure to violence in relation to depressive symptoms  
30 611 among male and female adolescent students in Cambodia. Soc Psychiatry Psychiatr  
31 612 Epidemiol 2013;48(3):397-405.  
32  
33 613 40. Nou L. Investigating stress symptomatology among Cambodian university students. Int  
34 614 Rev Mod Sociol 2013;39(1):133-64.  
35  
36 615 41. Kwok KW, Chan S, Heng C, Kim S, Neth B, Thon V. Scoping Study: Research Capacities of  
37 616 Cambodia's Universities. Phnom Penh: Development Research Forum in Cambodia;  
38 617 2010.  
39  
40 618 42. Radloff LS. The CES-D scale: A self-report depression scale for research in the general  
41 619 population. Appl Psychol Meas 1977;1:385-401.  
42  
43  
44  
45  
46  
47  
48  
49  
50  
51  
52  
53  
54  
55  
56  
57  
58  
59  
60

- 1  
2  
3 620 43. Shima S, Shikano T, Kitamura T, et al. New self-rated scale for depression (in Japanese).  
4  
5 621 Japanese J Clin Psychiatry 1985;27:717-23.  
6  
7 622 44. Wada K, Tanaka K, Theriault G, et al. Validity of the Center for Epidemiologic Studies  
8  
9 623 Depression Scale as a screening instrument of major depressive disorder among  
10  
11 624 Japanese workers. Am J Ind Med 2007;50:8-12.  
12  
13 625 45. National Institute of Statistics, Directorate General for Health, and ORC Macro.  
14  
15 626 Cambodia Demographic and Health Survey 2014. Phnom Penh: National Institute of  
16  
17 627 Statistics and ORC Macro; 2014.  
18  
19 628 46. Ministry of Education, Youth, and Sport. Examining life experiences and HIV risks of  
20  
21 629 young entertainment workers in four Cambodian cities. Phnom Penh: 46. Ministry of  
22  
23 630 Education, Youth, and Sport; 2012.  
24  
25 631 47. Yi S, Poudel KC, Yasuoka J, et al. Role of risk and protective factors in risky sexual  
26  
27 632 behavior among high school students in Cambodia. BMC Public Health 2010;10:477.  
28  
29 633 48. Yi S, Poudel KC, Yasuoka J, et al. Risk vs. protective factors for substance use among  
30  
31 634 adolescents in Cambodia. J Subst Use 2011;16(1):14-26.  
32  
33 635 49. Steptoe A, Wardle J. The European health and behaviour survey: The development of an  
34  
35 636 international study in health psychology. Psychol Health 1996;11:49-73.  
36  
37 637 50. Center for Disease Control (CDC). Youth Risk Behavior Surveillance: National College  
38  
39 638 Health Risk Behavior Survey – United States, 1995. MMWR 1997;46(SS-6):1-54.  
40  
41 639 51. Center for Disease Control (CDC)/World Health Organization (WHO). The Global School-  
42  
43 640 based Student Health Survey (GSHS). Atlanta, GA: CDC/WHO; 2012.  
44  
45 641 52. Bernstein DP, Stein JA, Newcomb MD, et al. Development and validation of a brief  
46  
47 642 screening version of the Childhood Trauma Questionnaire. Child Abuse Negl  
48  
49 643 2003;27(2):169-190.  
50  
51 644 53. Gandek BL, Ware JE, Aaronson NK, et al. Cross-validation of item selection and scoring  
52  
53 645 for the SF-12 Health Survey in nine countries: Results from the IQOLA Project.  
54  
55 646 International Quality of Life Assessment. J Clin Epidemiol 1998;51(11):1171-8.  
56  
57 647 54. Ware JE, Kosinski MA, Keller SD. SF-36 Physical and Mental Health Summary Scales: A  
58  
59 648 User Manual. Boston: Health Institute, New England Medical Center; 1994.  
60

- 1  
2  
3 649 55. Andrews B, Wilding JM. The relation of depression and anxiety to life-stress and  
4  
5 650 achievement in students. *Br J Psychol* 2004;95:509-21.  
6  
7 651 56. Eisenberg D, Gollust SE, Golberstein E, et al. Prevalence and correlates of depression,  
8  
9 652 anxiety, and suicidality among university students. *Am J Orthopsychiatry*  
10  
11 653 2007;77(4):534-2.  
12  
13 654 57. Lorant V, Deliege D, Eaton W, et al. Socioeconomic inequalities in depression: A meta-  
14  
15 655 analysis. *Am J Epidemiol* 2003;157(2):98-112.  
16  
17 656 58. World Bank. Improving Macroeconomic and Financial Resilience: Cambodia Economic  
18  
19 657 Update April 2016. Washington DC: World Bank; 2016.  
20  
21 658 59. Teychenne M, Ball K, Salmon J. Physical activity and likelihood of depression in adults: A  
22  
23 659 review. *Prev Med* 2008;46(5):397-411.  
24  
25 660 60. Azar D, Ball K, Salmon J, et al. The association between physical activity and depressive  
26  
27 661 symptoms in young women: A review. *Ment Health Physic Act* 2008;1(2):82-8.  
28  
29 662 61. Chen L, Wang L, Qiu XH, et al. Depression among Chinese University Students:  
30  
31 663 Prevalence and Socio-Demographic Correlates. *PLoS One* 2013;8(3):e58379.  
32  
33 664 62. Schunert T, Khann S, Kao S, et al. Cambodian Mental Health Survey 2012. Phnom Penh:  
34  
35 665 Royal University of Phnom Penh; 2012.  
36  
37 666 63. McLaughlin D, Wickeri E (2012) Special Report: Mental Health and Human Rights in  
38  
39 667 Cambodia. New York: Leitner Center for International Law and Justice; 2012.  
40  
41 668 64. Aberdein C, Zimmerman C. Access to mental health and psychosocial services in  
42  
43 669 Cambodia by survivors of trafficking and exploitation: a qualitative study. *Int J Ment*  
44  
45 670 *Health Syst* 2015;9:16.  
46  
47 671  
48  
49 672  
50  
51 673  
52  
53 674  
54  
55 675  
56  
57 676  
58  
59 677  
60

1  
2  
3  
4  
5  
6  
7  
8  
9  
10  
11  
12  
13  
14  
15  
16  
17  
18  
19  
20  
21  
22  
23  
24  
25  
26  
27  
28  
29  
30  
31  
32  
33  
34  
35  
36  
37  
38  
39  
40  
41  
42  
43  
44  
45  
46  
47  
48  
49  
50  
51  
52  
53  
54  
55  
56  
57  
58  
59  
60

678

For peer review only

STROBE Statement—Checklist of items that should be included in reports of *cross-sectional studies*

|                              | <b>Item No</b> | <b>Recommendation</b>                                                                                                                                                                                                                                                                                                                                                                                                                        |
|------------------------------|----------------|----------------------------------------------------------------------------------------------------------------------------------------------------------------------------------------------------------------------------------------------------------------------------------------------------------------------------------------------------------------------------------------------------------------------------------------------|
| <b>Title and abstract</b>    | 1              | (a) Indicate the study's design with a commonly used term in the title or the abstract Confirmed (Lines 1-54)<br>(b) Provide in the abstract an informative and balanced summary of what was done and what was found. Confirmed (Lines 30-54)                                                                                                                                                                                                |
| <b>Introduction</b>          |                |                                                                                                                                                                                                                                                                                                                                                                                                                                              |
| Background/rationale         | 2              | Explain the scientific background and rationale for the investigation being reported. Confirmed (Lines 67-108)                                                                                                                                                                                                                                                                                                                               |
| Objectives                   | 3              | State specific objectives, including any prespecified hypotheses. Confirmed (Lines 107-108)                                                                                                                                                                                                                                                                                                                                                  |
| <b>Methods</b>               |                |                                                                                                                                                                                                                                                                                                                                                                                                                                              |
| Study design                 | 4              | Present key elements of study design early in the paper. Confirmed (Line 112)                                                                                                                                                                                                                                                                                                                                                                |
| Setting                      | 5              | Describe the setting, locations, and relevant dates, including periods of recruitment, exposure, follow-up, and data collection. Confirmed (Line 112-114)                                                                                                                                                                                                                                                                                    |
| Participants                 | 6              | (a) Give the eligibility criteria, and the sources and methods of selection of participants. Confirmed (Lines 130-138)                                                                                                                                                                                                                                                                                                                       |
| Variables                    | 7              | Clearly define all outcomes, exposures, predictors, potential confounders, and effect modifiers. Give diagnostic criteria, if applicable. Confirmed (Lines 157-202)                                                                                                                                                                                                                                                                          |
| Data sources/<br>measurement | 8*             | For each variable of interest, give sources of data and details of methods of assessment (measurement). Describe comparability of assessment methods if there is more than one group. Confirmed (Lines 157-202)                                                                                                                                                                                                                              |
| Bias                         | 9              | Describe any efforts to address potential sources of bias. Confirmed (Lines 130-138)                                                                                                                                                                                                                                                                                                                                                         |
| Study size                   | 10             | Explain how the study size was arrived at. Confirmed (114-120)                                                                                                                                                                                                                                                                                                                                                                               |
| Quantitative variables       | 11             | Explain how quantitative variables were handled in the analyses. If applicable, describe which groupings were chosen and why. Confirmed (Lines 204-218)                                                                                                                                                                                                                                                                                      |
| Statistical methods          | 12             | (a) Describe all statistical methods, including those used to control for confounding. Confirmed (Lines 213-217)<br>(b) Describe any methods used to examine subgroups and interactions. (Not applicable)<br>(c) Explain how missing data were addressed (Not applicable)<br>(d) If applicable, describe analytical methods taking account of sampling strategy. (Not applicable)<br>(e) Describe any sensitivity analyses. (Not applicable) |
| <b>Results</b>               |                |                                                                                                                                                                                                                                                                                                                                                                                                                                              |
| Participants                 | 13*            | (a) Report numbers of individuals at each stage of study—eg numbers potentially eligible, examined for eligibility, confirmed eligible, included in the study, completing follow-up, and analysed. Confirmed (Lines 232)<br>(b) Give reasons for non-participation at each stage (Not applicable)<br>(c) Consider use of a flow diagram (Not applicable)                                                                                     |
| Descriptive data             | 14*            | (a) Give characteristics of study participants (eg demographic, clinical, social) and information on exposures and potential confounders. Confirmed (Lines 231-244)<br>(b) Indicate number of participants with missing data for each variable of interest. (Not applicable)                                                                                                                                                                 |
| Outcome data                 | 15*            | Report numbers of outcome events or summary measures. Confirmed (238-239)                                                                                                                                                                                                                                                                                                                                                                    |
| Main results                 | 16             | (a) Give unadjusted estimates and, if applicable, confounder-adjusted estimates and                                                                                                                                                                                                                                                                                                                                                          |

|                          |    |                                                                                                                                                                                                       |
|--------------------------|----|-------------------------------------------------------------------------------------------------------------------------------------------------------------------------------------------------------|
|                          |    | their precision (eg, 95% confidence interval). Make clear which confounders were adjusted for and why they were included. Confirmed (213-217, 240-355)                                                |
|                          |    | (b) Report category boundaries when continuous variables were categorized. (Not applicable)                                                                                                           |
|                          |    | (c) If relevant, consider translating estimates of relative risk into absolute risk for a meaningful time period. (Not applicable)                                                                    |
| Other analyses           | 17 | Report other analyses done—eg analyses of subgroups and interactions, and sensitivity analyses. (Not applicable)                                                                                      |
| <b>Discussion</b>        |    |                                                                                                                                                                                                       |
| Key results              | 18 | Summarise key results with reference to study objectives. Confirmed (Lines 358-366)                                                                                                                   |
| Limitations              | 19 | Discuss limitations of the study, taking into account sources of potential bias or imprecision. Discuss both direction and magnitude of any potential bias. Confirmed (Lines 436-455)                 |
| Interpretation           | 20 | Give a cautious overall interpretation of results considering objectives, limitations, multiplicity of analyses, results from similar studies, and other relevant evidence. Confirmed (Lines 367-435) |
| Generalisability         | 21 | Discuss the generalisability (external validity) of the study results. Confirmed (Lines 436-438)                                                                                                      |
| <b>Other information</b> |    |                                                                                                                                                                                                       |
| Funding                  | 22 | Give the source of funding and the role of the funders for the present study and, if applicable, for the original study on which the present article is based. Confirmed (Lines 490-492)              |

\*Give information separately for exposed and unexposed groups.

**Note:** An Explanation and Elaboration article discusses each checklist item and gives methodological background and published examples of transparent reporting. The STROBE checklist is best used in conjunction with this article (freely available on the Web sites of PLoS Medicine at <http://www.plosmedicine.org/>, Annals of Internal Medicine at <http://www.annals.org/>, and Epidemiology at <http://www.epidem.com/>). Information on the STROBE Initiative is available at [www.strobe-statement.org](http://www.strobe-statement.org).
